# Supplementary material for: Mechanistic insights into the oxidation of copper(i) species during NH3-SCR over Cu-CHA zeolites: a DFT study
Source: Royal Society of Chemistry journal article supplement (doi:10.1039/d0cy00379d), 2020-01-01
Supplement: d0cy00379d1.pdf [file d0cy00379d1.pdf]

ELECTRONIC SUPPLEMENTARY INFORMATION

**Mechanistic insights into the oxidation of copper(I) species  
during NH<sub>3</sub>–SCR over Cu-CHA zeolites: a DFT study**

Chong Liu,<sup>\*a</sup> Hiroe Kubota,<sup>a</sup> Takashi Toyao,<sup>ab</sup> Zen Maeno<sup>a</sup> and Ken-ichi Shimizu<sup>\*ab</sup>

<sup>a</sup> Institute for Catalysis, Hokkaido University, N-21, W-10, Sapporo 001-0021, Japan

<sup>b</sup> Elements Strategy Initiative for Catalysts and Batteries, Kyoto University, Katsura, Kyoto 615-8520, Japan

Corresponding authors:

\*Chong Liu (chongliu@cat.hokudai.ac.jp)

\*Ken-ichi Shimizu (kshimizu@cat.hokudai.ac.jp)

**Scheme S1** SCR reaction with exclusive O<sub>2</sub> activation for the oxidation half cycle*Oxidation half cycle*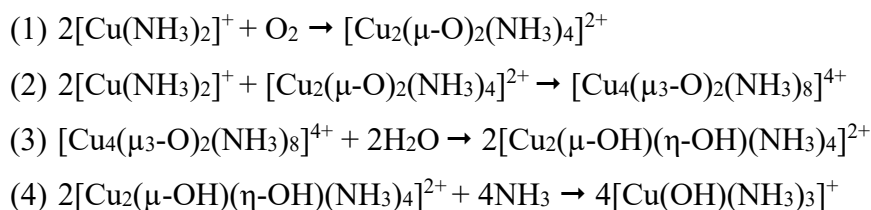

The oxidation half-reaction can be obtained as

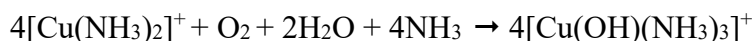*Reduction half cycle*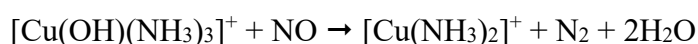*Overall reaction (Standard SCR mechanism)*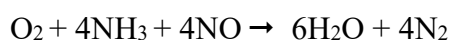**Scheme S2** SCR reaction with both O<sub>2</sub> and NO activation for the oxidation half cycle*Oxidation half cycle<sup>a</sup>*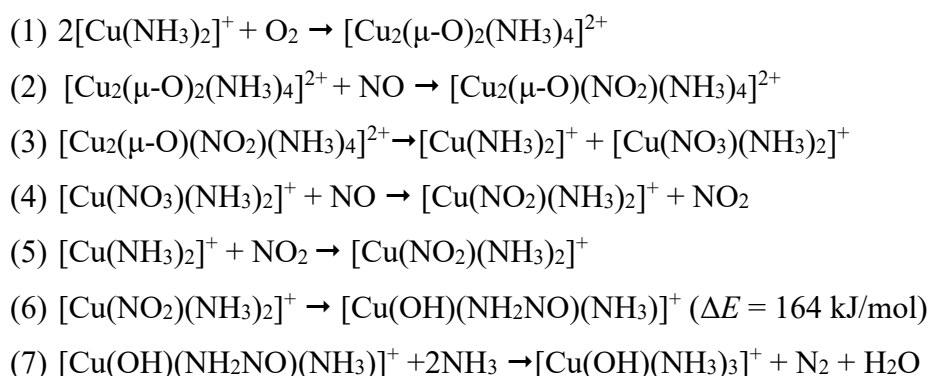

The oxidation half-reaction can be obtained as

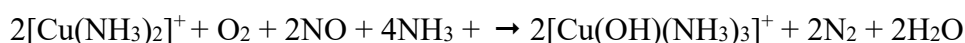

<sup>a</sup>The conversion pathways of Cu nitrite species via nitrosamine (NH<sub>2</sub>NO) and ammonium nitrite (NH<sub>4</sub>NO<sub>2</sub>) intermediates give same stoichiometry of the oxidation half cycle, and only the NH<sub>2</sub>NO-involved mechanism is described.

*Reduction half cycle*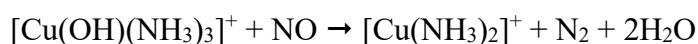*Overall reaction (Standard SCR mechanism)*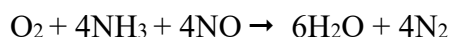

## Spin states of the transition states and intermediates

During the geometry optimizations of DFT calculations, the electronic configurations with different spin states were evaluated, and the most stable ones were chosen to describe the minimum-energy reaction pathways. The spin-transition reaction was studied using the minimum energy crossing point (MECP) approach for the two potential energy surfaces.

The detailed information of the spin state for the reaction pathways described in the manuscript was summarized in the following Table S1 and additional supporting Fig. S1-S3.

**Table S1** Summary of the spin transition information for the optimized structures along the minimum-energy reaction pathways.

| Reaction pathways in manuscript | Spin transition | Spin states | Remarks                                                                                                                                                                                                                                                                                                               |
|---------------------------------|-----------------|-------------|-----------------------------------------------------------------------------------------------------------------------------------------------------------------------------------------------------------------------------------------------------------------------------------------------------------------------|
| Fig. 2                          | Yes             | Fig. S1     | The spin-transition occurs with O <sub>2</sub> dissociation.                                                                                                                                                                                                                                                          |
| Fig. 3                          | No              | Singlet     |                                                                                                                                                                                                                                                                                                                       |
| Fig. 4                          | No              | Singlet     |                                                                                                                                                                                                                                                                                                                       |
| Fig. 5a                         | No              | Singlet     | The “2[Cu(OH)] <sup>+</sup> ” intermediate is antiferromagnetic with two unpaired electrons with opposite spin directions. Each Cu center possesses one unpaired electron.                                                                                                                                            |
| Fig. 5b                         | No              | Doublet     |                                                                                                                                                                                                                                                                                                                       |
| Fig. 6                          | No              | Singlet     |                                                                                                                                                                                                                                                                                                                       |
| Fig. 7                          | Yes             | Fig. S2     | The change of spin state is due to the release of gaseous NO <sub>2</sub> .                                                                                                                                                                                                                                           |
| Fig. 8a                         | Yes             | Fig. S3     | The change of spin state is due to the adsorption of gaseous NO. The “[Cu(NO <sub>2</sub> )] <sup>+</sup> + NO <sub>2</sub> ” intermediate is antiferromagnetic with two unpaired electrons with opposite spin directions, which are located on the Cu center and the neutral NO <sub>2</sub> molecule, respectively. |
| Fig. 8b                         | No              | Doublet     |                                                                                                                                                                                                                                                                                                                       |

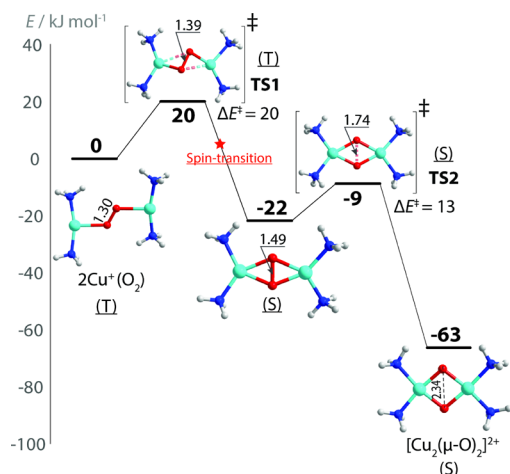

**Fig. S1** Spin states of the reaction pathways (Fig. 2 in the main text) for the oxidative activation of Cu(I) into Cu(II) species in CHA zeolite via O<sub>2</sub> dissociation and oxidation of two mononuclear [Cu(NH<sub>3</sub>)<sub>2</sub>]<sup>+</sup>. The singlet and triplet spin states are denoted by (S) and (T), respectively.

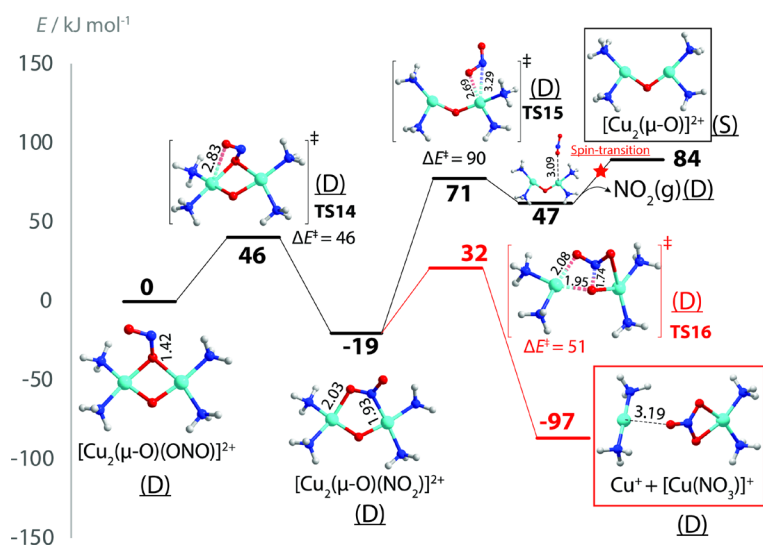

**Fig. S2** Spin states of the reaction pathways (Fig. 7 in the main text) for the NO-assisted activation of Cu(I) into Cu(II) species in CHA zeolite. The singlet and doublet spin states are denoted by (S) and (D), respectively.

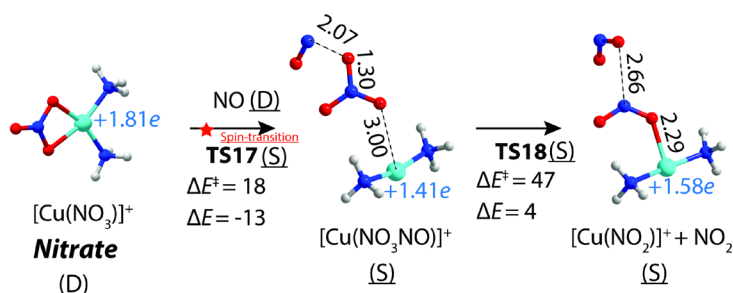

**Fig. S3** Spin states of the reaction pathways (Fig. 8a in the main text) for the conversion from Cu nitrate to nitrite species. The singlet and doublet spin states are denoted by (S) and (D), respectively.

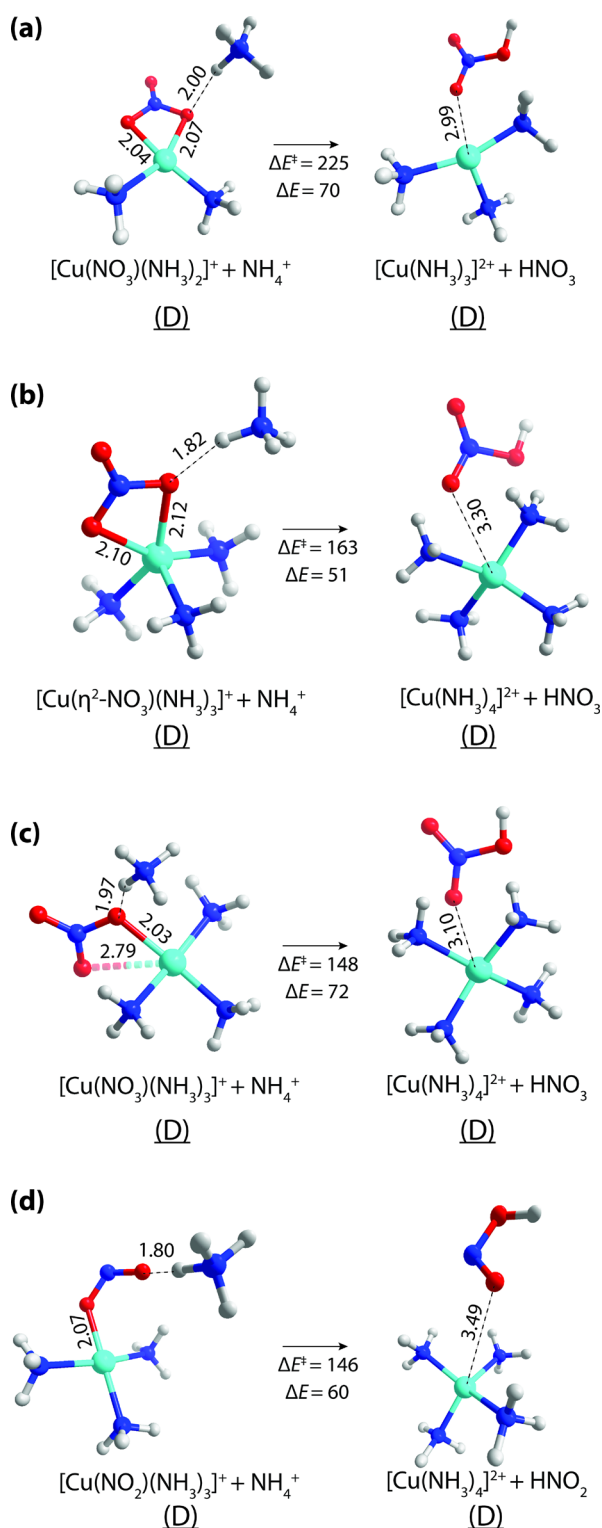

**Fig. S4** Reactions of Cu(II) nitrate/nitrate species with Brønsted acid sites (in the form of  $\text{NH}_4^+$ ) to release  $\text{HNO}_3/\text{HNO}_2$ . Cu nitrate (a) is in bidentate configuration with two  $\text{NH}_3$  ligands; (b) and (c) are Cu nitrates with three  $\text{NH}_3$  ligands (*Ref.* C. Negri et al., *ChemCatChem*, 2019, **11**, 3828–3838); Cu nitrite (d) is a structural analog of Cu nitrate (c). Activation and reaction energies ( $\Delta E^\ddagger$  and  $\Delta E$ ) are in kJ/mol. Zeolite frameworks are omitted for clarity. The doublet spin states are denoted by (D).

# Geometric parameters of the transition states and intermediates and their absolute energies

2Cu<sup>+</sup>, Fig.1, E= -952.241 eV

| 1.0           |               |               |  |
|---------------|---------------|---------------|--|
| 13.6750001907 | 0.0000000000  | 0.0000000000  |  |
| -6.8375000954 | 11.8428975619 | 0.0000000000  |  |
| 0.0000000000  | 0.0000000000  | 14.7670001984 |  |

| H  | Al | Si | O  | N | Cu |
|----|----|----|----|---|----|
| 14 | 4  | 32 | 72 | 4 | 2  |

|             |             |             |  |  |  |
|-------------|-------------|-------------|--|--|--|
| Direct      |             |             |  |  |  |
| 0.758640230 | 0.768444598 |             |  |  |  |
| 0.746626794 | 0.668122351 | 0.591197968 |  |  |  |
| 0.747655749 | 0.649472594 | 0.660548985 |  |  |  |
| 0.353853434 | 0.521105707 | 0.548480272 |  |  |  |
| 0.377860874 | 0.513360202 | 0.576818526 |  |  |  |
| 0.392854601 | 0.630356073 | 0.685620368 |  |  |  |
| 0.210024476 | 0.401399910 | 0.644527614 |  |  |  |
| 0.181892961 | 0.350811481 | 0.210869521 |  |  |  |
| 0.239421248 | 0.487506986 | 0.317644119 |  |  |  |
| 0.498086631 | 0.333892703 | 0.298348397 |  |  |  |
| 0.557748795 | 0.449868351 | 0.275715053 |  |  |  |
| 0.571919203 | 0.456945509 | 0.215029672 |  |  |  |
| 0.284945518 | 0.163334101 | 0.536229551 |  |  |  |
| 0.736426890 | 0.853284836 | 0.426785019 |  |  |  |
| 0.243176565 | 0.536368049 | 0.226785019 |  |  |  |
| 0.704830229 | 0.767078638 | 0.352629551 |  |  |  |
| 0.130350307 | 0.107397623 | 0.226785019 |  |  |  |
| 0.801498711 | 0.983187199 | 0.226785019 |  |  |  |
| 0.251582831 | 0.321209788 | 0.226785019 |  |  |  |
| 0.695899308 | 0.544143081 | 0.226785019 |  |  |  |
| 0.359184086 | 0.872344017 | 0.226785019 |  |  |  |
| 0.372285038 | 0.106053509 | 0.226785019 |  |  |  |
| 0.902930558 | 0.640956759 | 0.226785019 |  |  |  |
| 0.480343550 | 0.767005622 | 0.226785019 |  |  |  |
| 0.475809455 | 0.759664357 | 0.226785019 |  |  |  |
| 0.582863986 | 0.978570342 | 0.226785019 |  |  |  |
| 0.235705927 | 0.303446174 | 0.226785019 |  |  |  |
| 0.578133404 | 0.206502438 | 0.226785019 |  |  |  |
| 0.911795139 | 0.875947927 | 0.226785019 |  |  |  |
| 0.041773625 | 0.441634268 | 0.226785019 |  |  |  |
| 0.697307885 | 0.767500758 | 0.226785019 |  |  |  |
| 0.811819017 | 0.980052769 | 0.226785019 |  |  |  |
| 0.044041604 | 0.216458187 | 0.226785019 |  |  |  |
| 0.806347728 | 0.432593048 | 0.226785019 |  |  |  |
| 0.475342125 | 0.318393081 | 0.226785019 |  |  |  |
| 0.911415040 | 0.870223403 | 0.226785019 |  |  |  |
| 0.467749119 | 0.313036740 | 0.226785019 |  |  |  |
| 0.578517139 | 0.209763259 | 0.226785019 |  |  |  |
| 0.137749687 | 0.656692624 | 0.226785019 |  |  |  |
| 0.031394646 | 0.442231864 | 0.226785019 |  |  |  |
| 0.377082914 | 0.105238065 | 0.226785019 |  |  |  |
| 0.246243268 | 0.545648456 | 0.226785019 |  |  |  |
| 0.798905015 | 0.443611592 | 0.226785019 |  |  |  |
| 0.039470538 | 0.219758615 | 0.226785019 |  |  |  |
| 0.706709743 | 0.544483721 | 0.226785019 |  |  |  |
| 0.365684301 | 0.870485663 | 0.226785019 |  |  |  |
| 0.574989438 | 0.978682995 | 0.226785019 |  |  |  |
| 0.902307034 | 0.631064717 | 0.226785019 |  |  |  |
| 0.132182091 | 0.654765010 | 0.226785019 |  |  |  |
| 0.144933596 | 0.088132910 | 0.226785019 |  |  |  |
| 0.711496174 | 0.299608052 | 0.226785019 |  |  |  |
| 0.118944779 | 0.542696335 | 0.226785019 |  |  |  |
| 0.386061758 | 0.629573345 | 0.226785019 |  |  |  |
| 0.029950149 | 0.973257482 | 0.226785019 |  |  |  |
| 0.715927362 | 0.019158786 | 0.226785019 |  |  |  |
| 0.361565351 | 0.328094006 | 0.226785019 |  |  |  |
| 0.029395511 | 0.675632834 | 0.226785019 |  |  |  |
| 0.011948271 | 0.313043535 | 0.226785019 |  |  |  |
| 0.676504195 | 0.644768715 | 0.226785019 |  |  |  |
| 0.326611072 | 0.973231733 | 0.226785019 |  |  |  |
| 0.917557836 | 0.110047162 | 0.226785019 |  |  |  |
| 0.231272876 | 0.790437043 | 0.226785019 |  |  |  |
| 0.904750168 | 0.424858958 | 0.226785019 |  |  |  |
| 0.568186224 | 0.730914176 | 0.226785019 |  |  |  |
| 0.250580907 | 0.066936128 | 0.226785019 |  |  |  |
| 0.916471958 | 0.755004287 | 0.226785019 |  |  |  |
| 0.576047719 | 0.446780026 | 0.226785019 |  |  |  |
| 0.805690110 | 0.894015014 | 0.226785019 |  |  |  |
| 0.790564060 | 0.505331193 | 0.226785019 |  |  |  |
| 0.794207573 | 0.539758503 | 0.226785019 |  |  |  |
| 0.443375975 | 0.845067918 | 0.226785019 |  |  |  |
| 0.131579861 | 0.218551680 | 0.226785019 |  |  |  |
| 0.499620199 | 0.880692184 | 0.226785019 |  |  |  |
| 0.144791678 | 0.180021882 | 0.226785019 |  |  |  |
| 0.808252394 | 0.547202170 | 0.226785019 |  |  |  |
| 0.612283885 | 0.113081418 | 0.226785019 |  |  |  |
| 0.145306274 | 0.229655217 | 0.226785019 |  |  |  |
| 0.463159502 | 0.905634701 | 0.226785019 |  |  |  |
| 0.498669386 | 0.228549525 | 0.226785019 |  |  |  |
| 0.804091811 | 0.879567146 | 0.226785019 |  |  |  |
| 0.145056695 | 0.531571686 | 0.226785019 |  |  |  |
| 0.814577579 | 0.866311967 | 0.226785019 |  |  |  |
| 0.475390971 | 0.186621010 | 0.226785019 |  |  |  |
| 0.165169761 | 0.569188654 | 0.226785019 |  |  |  |
| 0.468760401 | 0.222771774 | 0.226785019 |  |  |  |
| 0.281273067 | 0.449897587 | 0.226785019 |  |  |  |
| 0.930788040 | 0.450171530 | 0.226785019 |  |  |  |
| 0.250911385 | 0.760650158 | 0.226785019 |  |  |  |
| 0.267048925 | 0.125331804 | 0.226785019 |  |  |  |

|             |             |             |  |  |  |
|-------------|-------------|-------------|--|--|--|
| 0.563171387 | 0.084455386 | 0.727400005 |  |  |  |
| 0.214391783 | 0.398847103 | 0.079718463 |  |  |  |
| 0.934554577 | 0.095266230 | 0.710102856 |  |  |  |
| 0.581023335 | 0.426734835 | 0.073506773 |  |  |  |
| 0.674655974 | 0.962993801 | 0.459232509 |  |  |  |
| 0.352745086 | 0.667861164 | 0.802253485 |  |  |  |
| 0.359307945 | 0.308233082 | 0.791855991 |  |  |  |
| 0.014677712 | 0.635423422 | 0.129234478 |  |  |  |
| 0.029191138 | 0.329623193 | 0.459807754 |  |  |  |
| 0.731884062 | 0.660577416 | 0.789509058 |  |  |  |
| 0.032459572 | 0.969854474 | 0.125118598 |  |  |  |
| 0.683066368 | 0.331562042 | 0.474532992 |  |  |  |
| 0.402544916 | 0.003068029 | 0.150863171 |  |  |  |
| 0.793713808 | 0.475914866 | 0.610792220 |  |  |  |
| 0.488870382 | 0.794071496 | 0.937253714 |  |  |  |
| 0.887503684 | 0.750394285 | 0.386197805 |  |  |  |
| 0.131756321 | 0.637923062 | 0.271214902 |  |  |  |
| 0.597925127 | 0.788705885 | 0.086705074 |  |  |  |
| 0.542764187 | 0.935539424 | 0.603729606 |  |  |  |
| 0.152809203 | 0.127220094 | 0.250749499 |  |  |  |
| 0.879024446 | 0.592457831 | 0.273819566 |  |  |  |
| 0.089746818 | 0.235213622 | 0.591534317 |  |  |  |
| 0.727353215 | 0.552000880 | 0.944173098 |  |  |  |
| 0.389497906 | 0.853763759 | 0.269583464 |  |  |  |
| 0.536229551 | 0.214422166 | 0.605440378 |  |  |  |
| 0.226785019 | 0.295161426 | 0.928405285 |  |  |  |
| 0.884362221 | 0.892148674 | 0.261181861 |  |  |  |
| 0.078946307 | 0.475350320 | 0.596007168 |  |  |  |
| 0.707354903 | 0.769342542 | 0.942726433 |  |  |  |
| 0.395858556 | 0.151323035 | 0.265777320 |  |  |  |
| 0.795842946 | 0.925574303 | 0.604556918 |  |  |  |
| 0.207205459 | 0.530112684 | 0.931495190 |  |  |  |
| 0.465440035 | 0.285508722 | 0.936607547 |  |  |  |
| 0.720200717 | 0.681738734 | 0.598448873 |  |  |  |
| 0.406505197 | 0.564893484 | 0.629283845 |  |  |  |
| 0.238771886 | 0.415847545 | 0.277322024 |  |  |  |
| 0.516172111 | 0.416490465 | 0.275126576 |  |  |  |
| 0.562791646 | 0.621509373 | 0.611009479 |  |  |  |
| 0.379590154 | 0.421143621 | 0.278238326 |  |  |  |

2Cu<sup>+</sup>(O<sub>2</sub>), Fig. 2, E = -962.702 eV

| 1.0           |               |               |  |
|---------------|---------------|---------------|--|
| 13.6750001907 | 0.0000000000  | 0.0000000000  |  |
| -6.8375000954 | 11.8428975619 | 0.0000000000  |  |
| 0.0000000000  | 0.0000000000  | 14.7670001984 |  |

| H  | Al | Si | O  | N | Cu |
|----|----|----|----|---|----|
| 14 | 4  | 32 | 74 | 4 | 2  |

|              |             |             |  |
|--------------|-------------|-------------|--|
| Direct       |             |             |  |
| 0.756222248  | 0.770046651 | 0.591802239 |  |
| 0.740018249  | 0.666631520 | 0.659241498 |  |
| 0.751069009  | 0.654500484 | 0.547122538 |  |
| 0.348380536  | 0.534319580 | 0.574589789 |  |
| 0.374655008  | 0.515825510 | 0.681050360 |  |
| 0.396382600  | 0.638549507 | 0.469162948 |  |
| 0.213040665  | 0.401177496 | 0.215728074 |  |
| 0.180502221  | 0.349105626 | 0.321821928 |  |
| 0.231028855  | 0.484826565 | 0.303184003 |  |
| 0.499153167  | 0.338762820 | 0.275274038 |  |
| 0.553783236  | 0.453107208 | 0.213415712 |  |
| 0.579367638  | 0.462590009 | 0.324054688 |  |
| 0.289783061  | 0.166975498 | 0.467390805 |  |
| 0.736644089  | 0.852833867 | 0.382757068 |  |
| 0.245850071  | 0.531699061 | 0.047012698 |  |
| 0.701581597  | 0.764267504 | 0.825847626 |  |
| 0.131926268  | 0.107209325 | 0.364928812 |  |
| 0.802078426  | 0.983891964 | 0.500172794 |  |
| 0.250751942  | 0.320818782 | 0.823160648 |  |
| 0.693999231  | 0.542386413 | 0.048933458 |  |
| 0.360020012  | 0.872415602 | 0.371389002 |  |
| 0.375461012  | 0.108076148 | 0.365798265 |  |
| 0.902026474  | 0.640147567 | 0.735220835 |  |
| 0.477986425  | 0.765665710 | 0.829671264 |  |
| 0.476695567  | 0.759609461 | 0.044690609 |  |
| 0.580194771  | 0.976576090 | 0.707670212 |  |
| 0.238113388  | 0.303249389 | 0.040678408 |  |
| 0.575306892  | 0.204667076 | 0.706452012 |  |
| 0.912008107  | 0.875524879 | 0.363441199 |  |
| 0.040258471  | 0.440312475 | 0.704406559 |  |
| 0.697249949  | 0.766302586 | 0.047893059 |  |
| 0.809255242  | 0.978929222 | 0.706461787 |  |
| 0.042083047  | 0.214604750 | 0.699224710 |  |
| 0.803962052  | 0.430730611 | 0.712237835 |  |
| 0.4736652095 | 0.316329896 | 0.827309489 |  |
| 0.912239552  | 0.869380057 | 0.156456739 |  |
| 0.469276637  | 0.310390353 | 0.041584011 |  |
| 0.580425739  | 0.209987029 | 0.501932502 |  |
| 0.137409061  | 0.652409973 | 0.162817299 |  |
| 0.034085680  | 0.442911476 | 0.497426987 |  |
| 0.377242357  | 0.103955992 | 0.157122329 |  |
| 0.245339707  | 0.543180823 | 0.830528677 |  |
| 0.800803304  | 0.443551272 | 0.506513119 |  |
| 0.041523542  | 0.219377086 | 0.491722256 |  |
| 0.703350544  | 0.541927278 | 0.832420588 |  |
| 0.365200102  | 0.868088603 | 0.163911819 |  |
| 0.574633777  | 0.977316916 | 0.499723941 |  |
| 0.901478827  | 0.629912317 | 0.166461974 |  |
| 0.132815734  | 0.653308868 | 0.378395379 |  |





|             |              |             |             |             |             |             |             |             |
|-------------|--------------|-------------|-------------|-------------|-------------|-------------|-------------|-------------|
| 0.897684813 | 0.622213483  | 0.162938446 | 0.547655940 | 0.715873361 | 0.627443314 | 0.338545889 | 0.649495900 | 0.801779091 |
| 0.129983768 | 0.639278531  | 0.374657273 | 0.458904475 | 0.584738731 | 0.657794714 | 0.340697199 | 0.289843976 | 0.803029656 |
| 0.138921916 | 0.079012632  | 0.150032088 | 0.593136072 | 0.635899246 | 0.674951077 | 0.016806807 | 0.633885682 | 0.129971638 |
| 0.690995097 | 0.284309745  | 0.720020533 | 0.227489710 | 0.410381794 | 0.266115338 | 0.037444934 | 0.324721217 | 0.482311457 |
| 0.120327130 | 0.530256748  | 0.428630561 | 0.192806602 | 0.334936470 | 0.362798810 | 0.695047319 | 0.641097963 | 0.774816215 |
| 0.380127043 | 0.624608755  | 0.073791720 | 0.221172184 | 0.468666673 | 0.363303512 | 0.025009133 | 0.961864054 | 0.125638664 |
| 0.039219953 | 0.960488021  | 0.399566472 | 0.358522743 | 0.293754786 | 0.265914351 | 0.678425372 | 0.314648420 | 0.466634274 |
| 0.691169620 | 0.999012172  | 0.739546537 | 0.393981189 | 0.402611703 | 0.197999477 | 0.391698360 | 0.986831307 | 0.150441140 |
| 0.360791981 | 0.314712256  | 0.058976047 | 0.492297351 | 0.390509903 | 0.255103201 | 0.792348385 | 0.457010210 | 0.601569712 |
| 0.023093766 | 0.655203044  | 0.399994284 | 0.594235063 | 0.929373264 | 0.214778468 | 0.453978896 | 0.783855259 | 0.941150784 |
| 0.021102108 | 0.311587632  | 0.702289402 | 0.652376771 | 0.960421562 | 0.319386959 | 0.885916829 | 0.737238407 | 0.374103040 |
| 0.667015672 | 0.630427122  | 0.071598738 | 0.733331800 | 0.001444019 | 0.226635367 | 0.130612046 | 0.619815707 | 0.271472812 |
| 0.312468916 | 0.961829007  | 0.363410681 | 0.610265315 | 0.605394781 | 0.317559183 | 0.596799254 | 0.779353261 | 0.063500471 |
| 0.896428466 | 0.107117236  | 0.454691410 | 0.630224764 | 0.619434416 | 0.202879280 | 0.540203214 | 0.914442301 | 0.604894519 |
| 0.235837221 | 0.768240035  | 0.140460491 | 0.737665057 | 0.674548209 | 0.272783667 | 0.146120772 | 0.120517008 | 0.253003091 |
| 0.903125584 | 0.408060193  | 0.476159692 | 0.300920695 | 0.527882338 | 0.666867667 | 0.868059397 | 0.573606670 | 0.264645249 |
| 0.561340928 | 0.729471803  | 0.802554011 | 0.317698985 | 0.535700083 | 0.553035140 | 0.050542235 | 0.181074679 | 0.593010306 |
| 0.243500695 | 0.056110308  | 0.128793210 | 0.191602483 | 0.469450384 | 0.600740731 | 0.704844415 | 0.533002138 | 0.928335369 |
| 0.907621980 | 0.744891644  | 0.165255919 | 0.376140386 | 0.230072111 | 0.606868863 | 0.388632327 | 0.845328808 | 0.275554717 |
| 0.562383115 | 0.425268620  | 0.792317033 | 0.242464453 | 0.166149735 | 0.637500703 | 0.524676085 | 0.205537573 | 0.594876826 |
| 0.794452786 | 0.875539124  | 0.761793613 | 0.277923495 | 0.183632493 | 0.201415554 | 0.281788170 | 0.281788170 | 0.930486381 |
| 0.780840158 | 0.948505473  | 0.776756644 | 0.240259230 | 0.520466328 | 0.051964097 | 0.882716715 | 0.889301717 | 0.266423076 |
| 0.798277915 | 0.450471494  | 0.093005270 | 0.697306931 | 0.760448098 | 0.823500574 | 0.055865668 | 0.480784118 | 0.601176143 |
| 0.456927776 | 0.844367683  | 0.106344067 | 0.136536270 | 0.096633390 | 0.369251788 | 0.737620711 | 0.775270045 | 0.935403228 |
| 0.119771935 | 0.201165855  | 0.424372464 | 0.791182697 | 0.969150305 | 0.486623049 | 0.394731194 | 0.144136220 | 0.260640919 |
| 0.471911758 | 0.862564862  | 0.737390930 | 0.232538402 | 0.305287391 | 0.824521780 | 0.786831558 | 0.950215518 | 0.601488769 |
| 0.141354442 | 0.169407949  | 0.077652194 | 0.689544559 | 0.530271709 | 0.037014805 | 0.205063030 | 0.518339276 | 0.938597334 |
| 0.806148291 | 0.532930315  | 0.439670146 | 0.348854780 | 0.866662323 | 0.374373972 | 0.478112608 | 0.274883538 | 0.927723949 |
| 0.616313219 | 0.101802282  | 0.505155396 | 0.360514849 | 0.096715830 | 0.364730358 | 0.405600071 | 0.532050788 | 0.468060046 |
| 0.129747838 | 0.209239095  | 0.761232853 | 0.897666216 | 0.626334548 | 0.366644472 | 0.546337724 | 0.513134778 | 0.401394576 |
| 0.450029135 | 0.904562831  | 0.445082068 | 0.458884209 | 0.757523060 | 0.834004521 | 0.710907042 | 0.651612997 | 0.530340672 |
| 0.471586972 | 0.204213902  | 0.763228416 | 0.468087494 | 0.752535045 | 0.045071770 | 0.535791576 | 0.635575891 | 0.628760040 |
| 0.815190434 | 0.866496682  | 0.437664092 | 0.564082265 | 0.961981475 | 0.709628582 | 0.244121000 | 0.414818615 | 0.334346344 |
| 0.128056765 | 0.517545521  | 0.773286939 | 0.232219368 | 0.291984260 | 0.037936430 | 0.412532866 | 0.379256040 | 0.258966297 |
| 0.804026961 | 0.850761414  | 0.103468366 | 0.557695627 | 0.190981165 | 0.699188352 | 0.660104036 | 0.938448787 | 0.253962010 |
| 0.479667187 | 0.160251647  | 0.421451837 | 0.909132361 | 0.867889404 | 0.371779084 | 0.656982243 | 0.659507692 | 0.264274269 |
| 0.145297468 | 0.544083178  | 0.108030185 | 0.025263285 | 0.432374626 | 0.272637665 | 0.484705836 | 0.484705836 | 0.606984258 |
| 0.460389763 | 0.191733941  | 0.088486597 | 0.701100349 | 0.759928405 | 0.038013685 | 0.299086899 | 0.221366823 | 0.591313243 |
| 0.262590528 | 0.429458737  | 0.791647375 | 0.795233190 | 0.976306915 | 0.707759976 | 0.549974084 | 0.583188176 | 0.508895874 |
| 0.911059618 | 0.419470280  | 0.731263757 | 0.024871020 | 0.197354466 | 0.698293746 | 0.400127977 | 0.459664553 | 0.363442063 |
| 0.244252712 | 0.750291228  | 0.407719523 | 0.790077448 | 0.417100728 | 0.706885934 | 0.661223829 | 0.800130367 | 0.259855539 |
| 0.274714589 | 0.130347863  | 0.402184755 | 0.461354017 | 0.299733609 | 0.823241889 | 0.288714379 | 0.354880184 | 0.595916688 |
| 0.541001081 | 0.066172987  | 0.714355171 | 0.907046676 | 0.863025665 | 0.163482055 |             |             |             |
| 0.224036604 | 0.3911175836 | 0.088118926 | 0.469110936 | 0.297216654 | 0.034308746 |             |             |             |
| 0.909175336 | 0.093732886  | 0.737992764 | 0.573674500 | 0.193311095 | 0.496833831 |             |             |             |
| 0.580494463 | 0.410802931  | 0.069860162 | 0.133604005 | 0.639164269 | 0.161891967 |             |             |             |
| 0.658188820 | 0.941908836  | 0.449054003 | 0.024605719 | 0.433479607 | 0.497225136 |             |             |             |
| 0.342828721 | 0.647712290  | 0.795973420 | 0.370802581 | 0.092640176 | 0.157666042 |             |             |             |
| 0.341763079 | 0.288260430  | 0.794847906 | 0.231362239 | 0.529998850 | 0.833882272 |             |             |             |
| 0.015789701 | 0.634227574  | 0.132018313 | 0.793726623 | 0.426204979 | 0.495371491 |             |             |             |
| 0.043026071 | 0.326039523  | 0.487458050 | 0.020591604 | 0.197015151 | 0.487363905 |             |             |             |
| 0.704999804 | 0.642103374  | 0.777328908 | 0.685065627 | 0.529541373 | 0.818947256 |             |             |             |
| 0.025317276 | 0.960927010  | 0.126299143 | 0.365036070 | 0.858885944 | 0.168240517 |             |             |             |
| 0.682445765 | 0.314893186  | 0.467233688 | 0.567658246 | 0.965463579 | 0.502027214 |             |             |             |
| 0.391390741 | 0.986634851  | 0.147390381 | 0.899003983 | 0.623055577 | 0.160280496 |             |             |             |
| 0.793282807 | 0.455710888  | 0.604088843 | 0.128954038 | 0.640874326 | 0.377881318 |             |             |             |
| 0.458103210 | 0.777922928  | 0.937892616 | 0.139338449 | 0.078509986 | 0.150722116 |             |             |             |
| 0.887420475 | 0.737943888  | 0.375427246 | 0.687334955 | 0.288128316 | 0.720040441 |             |             |             |
| 0.132431462 | 0.615211248  | 0.268657774 | 0.118681952 | 0.531264365 | 0.431334466 |             |             |             |
| 0.597064137 | 0.778860331  | 0.066000819 | 0.380171716 | 0.625283837 | 0.072495259 |             |             |             |
| 0.541309893 | 0.913642943  | 0.603256285 | 0.035731900 | 0.959069252 | 0.399172455 |             |             |             |
| 0.144377500 | 0.122978032  | 0.251618415 | 0.692228377 | 0.999993086 | 0.738646150 |             |             |             |
| 0.865625679 | 0.571880221  | 0.266933143 | 0.360891968 | 0.312477112 | 0.053122388 |             |             |             |
| 0.046196900 | 0.172104120  | 0.593833029 | 0.021352984 | 0.655724049 | 0.402957708 |             |             |             |
| 0.705809593 | 0.530280769  | 0.929852784 | 0.013810408 | 0.309588373 | 0.707119107 |             |             |             |
| 0.392518640 | 0.848258018  | 0.722636294 | 0.666338742 | 0.630411267 | 0.071713187 |             |             |             |
| 0.526285887 | 0.205162510  | 0.595093310 | 0.308844358 | 0.960017622 | 0.364027619 |             |             |             |
| 0.209623680 | 0.283681035  | 0.928917408 | 0.896246970 | 0.104506873 | 0.626652837 |             |             |             |
| 0.884404957 | 0.890897632  | 0.268040299 | 0.236075625 | 0.768289387 | 0.140678078 |             |             |             |
| 0.066971511 | 0.487540096  | 0.601224482 | 0.898364544 | 0.406564236 | 0.471454322 |             |             |             |
| 0.735271513 | 0.776926637  | 0.935520113 | 0.558073580 | 0.731675684 | 0.810753286 |             |             |             |
| 0.400639266 | 0.145184696  | 0.258632183 | 0.243149012 | 0.054944012 | 0.127585784 |             |             |             |
| 0.786979496 | 0.954501450  | 0.601600051 | 0.908954501 | 0.745728195 | 0.162218213 |             |             |             |
| 0.214557230 | 0.516635418  | 0.934749186 | 0.558935463 | 0.425054938 | 0.793424606 |             |             |             |
| 0.471344888 | 0.277894408  | 0.927159429 | 0.792789459 | 0.875220478 | 0.763065517 |             |             |             |
| 0.395299286 | 0.552577019  | 0.459169418 | 0.778325915 | 0.504263341 | 0.727771120 |             |             |             |
| 0.537130892 | 0.518398643  | 0.408810347 | 0.799247384 | 0.541254163 | 0.090463132 |             |             |             |
| 0.693585992 | 0.654797196  | 0.539932013 | 0.457890242 | 0.844104946 | 0.111287065 |             |             |             |
| 0.511315882 | 0.679994583  | 0.606057465 | 0.118535072 | 0.201452032 | 0.422721297 |             |             |             |
| 0.237994984 | 0.415676236  | 0.329719454 | 0.471551806 | 0.865060091 | 0.775467753 |             |             |             |
| 0.411435366 | 0.378944486  | 0.266794860 | 0.142351344 | 0.171068490 | 0.080705814 |             |             |             |
| 0.660959661 | 0.936186492  | 0.252589107 | 0.803808808 | 0.531595767 | 0.435550183 |             |             |             |
| 0.656386435 | 0.656572044  | 0.266635478 | 0.616034329 | 0.102387890 | 0.506255746 |             |             |             |
| 0.278860837 | 0.405069232  | 0.597683549 | 0.131992623 | 0.213971749 | 0.759400606 |             |             |             |
| 0.254092097 | 0.115179025  | 0.603971064 | 0.449524373 | 0.906596601 | 0.446373165 |             |             |             |
| 0.537634373 | 0.603302896  | 0.505638480 | 0.467807591 | 0.205120668 | 0.761287510 |             |             |             |
| 0.393619001 | 0.465815932  | 0.364014834 | 0.810633242 | 0.863732398 | 0.434897572 |             |             |             |
| 0.660471559 | 0.797103345  | 0.259863079 | 0.125356019 | 0.517633200 | 0.772165239 |             |             |             |
| 0.265122056 | 0.259719253  | 0.593730688 | 0.803480387 | 0.851233959 | 0.102556750 |             |             |             |
|             |              |             | 0.477317154 | 0.158113033 | 0.421630800 |             |             |             |
|             |              |             | 0.147326231 | 0.542594969 | 0.115937144 |             |             |             |
|             |              |             | 0.461529583 | 0.192967743 | 0.092391215 |             |             |             |
|             |              |             | 0.261469483 | 0.432757050 | 0.798331022 |             |             |             |
|             |              |             | 0.906618237 | 0.421905071 | 0.733553946 |             |             |             |
|             |              |             | 0.243634805 | 0.750074685 | 0.412560463 |             |             |             |
|             |              |             | 0.272063583 | 0.128723606 | 0.406659156 |             |             |             |
|             |              |             | 0.543098450 | 0.068843707 | 0.716452003 |             |             |             |
|             |              |             | 0.228844285 | 0.393285990 | 0.088885962 |             |             |             |
|             |              |             | 0.911036491 | 0.092701957 | 0.735325277 |             |             |             |
|             |              |             |             |             |             |             |             |             |

|             |             |             |                |              |               |              |             |             |
|-------------|-------------|-------------|----------------|--------------|---------------|--------------|-------------|-------------|
| 0.372599840 | 0.094323941 | 0.157585874 | 0.0000000000   | 0.0000000000 | 14.7670001984 | 0.250267416  | 0.751580894 | 0.409629136 |
| 0.236466333 | 0.531378508 | 0.829673350 | H Al Si O N Cu |              |               | 0.278882176  | 0.132735699 | 0.404084593 |
| 0.795368135 | 0.428492904 | 0.496686190 | 24 4 32 74 8 4 |              |               | 0.549813807  | 0.074268252 | 0.719486058 |
| 0.018590696 | 0.197161138 | 0.486602366 | Direct         |              |               | 0.232646570  | 0.394031972 | 0.086335123 |
| 0.688635468 | 0.528215647 | 0.822209597 |                | 0.740471423  | 0.731192112   | 0.495747447  | 0.918918490 | 0.088454247 |
| 0.365156919 | 0.859617114 | 0.166959047 |                | 0.736825228  | 0.673997939   | 0.596503139  | 0.582904518 | 0.411677092 |
| 0.569316387 | 0.966724813 | 0.501884520 |                | 0.738804102  | 0.608905315   | 0.502102375  | 0.657715440 | 0.934778929 |
| 0.899851263 | 0.623787284 | 0.161719859 |                | 0.522436500  | 0.648626745   | 0.678746045  | 0.341941893 | 0.657198071 |
| 0.131600052 | 0.642302215 | 0.376854151 |                | 0.457421571  | 0.511012971   | 0.682112932  | 0.350382358 | 0.299995661 |
| 0.140156195 | 0.081807941 | 0.152348921 |                | 0.594740033  | 0.586368024   | 0.689307928  | 0.019655636 | 0.630701303 |
| 0.690869391 | 0.289104134 | 0.721118450 |                | 0.218862966  | 0.413653046   | 0.267244786  | 0.030079717 | 0.320812255 |
| 0.123395398 | 0.536237061 | 0.434806734 |                | 0.182025030  | 0.334583014   | 0.360916078  | 0.705864251 | 0.643413663 |
| 0.381055206 | 0.625854611 | 0.073660180 |                | 0.205728650  | 0.465692401   | 0.364909947  | 0.027910598 | 0.968367040 |
| 0.038081508 | 0.959705710 | 0.398937166 |                | 0.330442458  | 0.301561832   | 0.259137064  | 0.688300490 | 0.316513836 |
| 0.695112586 | 0.000994210 | 0.737245023 |                | 0.384449482  | 0.416251034   | 0.196092889  | 0.390335232 | 0.986814797 |
| 0.361458451 | 0.312271982 | 0.052774795 |                | 0.467982322  | 0.377753407   | 0.247711286  | 0.780272305 | 0.457258165 |
| 0.023985332 | 0.657294512 | 0.400466412 |                | 0.571248889  | 0.849580407   | 0.234533101  | 0.466376245 | 0.782503545 |
| 0.007441330 | 0.305116564 | 0.721702874 |                | 0.634077549  | 0.882875264   | 0.336290807  | 0.894332469 | 0.740934491 |
| 0.667248130 | 0.631006420 | 0.073760435 |                | 0.709666848  | 0.911322713   | 0.241904825  | 0.132209212 | 0.614417493 |
| 0.312183350 | 0.962806643 | 0.362982124 |                | 0.619649708  | 0.540144444   | 0.316997141  | 0.599337518 | 0.780100167 |
| 0.896109283 | 0.103667580 | 0.453375250 |                | 0.618297637  | 0.546271086   | 0.201735094  | 0.540651679 | 0.919403374 |
| 0.235724404 | 0.768010318 | 0.141631499 |                | 0.738753855  | 0.604780436   | 0.257377416  | 0.153277054 | 0.136402428 |
| 0.902595818 | 0.411908209 | 0.475654036 |                | 0.327136934  | 0.641385019   | 0.666540027  | 0.876897454 | 0.578732967 |
| 0.559654176 | 0.731089294 | 0.804970086 |                | 0.376645416  | 0.663215458   | 0.560506582  | 0.041793562 | 0.197109461 |
| 0.244633317 | 0.058868401 | 0.130660489 |                | 0.240446270  | 0.608725071   | 0.579225063  | 0.714810193 | 0.532585442 |
| 0.912261069 | 0.747436285 | 0.161886781 |                | 0.360740870  | 0.320884764   | 0.577845752  | 0.395043671 | 0.849299312 |
| 0.562974095 | 0.425571740 | 0.792378783 |                | 0.243873820  | 0.257915467   | 0.639620543  | 0.541666329 | 0.212419778 |
| 0.792258382 | 0.871874213 | 0.761561573 |                | 0.236312777  | 0.268325329   | 0.528350180  | 0.203695551 | 0.287391841 |
| 0.782418132 | 0.503826976 | 0.776654065 |                | 0.244654298  | 0.521127641   | 0.049290188  | 0.877481639 | 0.883258045 |
| 0.799701750 | 0.541628718 | 0.092487246 |                | 0.697696209  | 0.759419620   | 0.822467506  | 0.074680060 | 0.462457836 |
| 0.456829816 | 0.845208645 | 0.108094983 |                | 0.143393114  | 0.101341359   | 0.370363295  | 0.726969481 | 0.775438607 |
| 0.121025734 | 0.198547140 | 0.430144250 |                | 0.794066564  | 0.966703832   | 0.487757146  | 0.405345827 | 0.148047656 |
| 0.475575238 | 0.868002057 | 0.776572585 |                | 0.239413887  | 0.311435431   | 0.820830524  | 0.796545208 | 0.955924392 |
| 0.143046528 | 0.172941521 | 0.080301071 |                | 0.693460941  | 0.530700266   | 0.038643535  | 0.215251446 | 0.519429445 |
| 0.806626439 | 0.534774601 | 0.437896937 |                | 0.355025053  | 0.869965374   | 0.372249633  | 0.484629035 | 0.275549412 |
| 0.619262755 | 0.103873126 | 0.505696177 |                | 0.367634267  | 0.100942001   | 0.364048660  | 0.391445339 | 0.505649328 |
| 0.136053428 | 0.215908095 | 0.756504655 |                | 0.905202448  | 0.630632460   | 0.368432730  | 0.539869487 | 0.540235937 |
| 0.451666415 | 0.907349646 | 0.445277393 |                | 0.465782136  | 0.760687053   | 0.831099749  | 0.706731379 | 0.655084789 |
| 0.470603138 | 0.204834387 | 0.762185156 |                | 0.472763807  | 0.753195107   | 0.405355424  | 0.525906146 | 0.579703450 |
| 0.812474430 | 0.863816917 | 0.434825778 |                | 0.570524931  | 0.967676461   | 0.709678829  | 0.232808679 | 0.415350795 |
| 0.130117923 | 0.519898355 | 0.769511700 |                | 0.235154644  | 0.293412656   | 0.033458602  | 0.396666378 | 0.383538693 |
| 0.806416452 | 0.852369845 | 0.120232594 |                | 0.566733837  | 0.196639419   | 0.698430240  | 0.635771930 | 0.853083193 |
| 0.480792731 | 0.159488395 | 0.421840221 |                | 0.912332594  | 0.868938804   | 0.707676630  | 0.657394528 | 0.588460267 |
| 0.147430375 | 0.543425202 | 0.111534879 |                | 0.032049011  | 0.431098968   | 0.3676717730 | 0.311510444 | 0.609210193 |
| 0.462131470 | 0.191985577 | 0.089734815 |                | 0.701434135  | 0.759967029   | 0.040452007  | 0.281889290 | 0.310774654 |
| 0.266133606 | 0.434266806 | 0.791396618 |                | 0.800521255  | 0.977432489   | 0.709075570  | 0.542626679 | 0.571877658 |
| 0.911858678 | 0.428460896 | 0.730164826 |                | 0.024865160  | 0.200226530   | 0.73769505   | 0.390467077 | 0.463372380 |
| 0.246266350 | 0.752361119 | 0.410575598 |                | 0.794663906  | 0.421494395   | 0.704717875  | 0.641199172 | 0.717164755 |
| 0.276689589 | 0.132606849 | 0.404611975 |                | 0.468982249  | 0.304003090   | 0.821354330  | 0.289969355 | 0.457619756 |
| 0.545712173 | 0.070357524 | 0.716294765 |                | 0.909561217  | 0.863666356   | 0.164774105  |             |             |
| 0.230092585 | 0.394429266 | 0.086282626 |                | 0.472137600  | 0.297611505   | 0.031006135  |             |             |
| 0.915011108 | 0.087104060 | 0.739308894 |                | 0.583469152  | 0.196109802   | 0.493612587  |             |             |
| 0.580980420 | 0.411346436 | 0.071216486 |                | 0.136811614  | 0.637656391   | 0.161530182  |             |             |
| 0.658198595 | 0.942139566 | 0.451114208 |                | 0.030719010  | 0.432001412   | 0.496824324  |             |             |
| 0.342166185 | 0.652324259 | 0.796646237 |                | 0.373885930  | 0.095148087   | 0.158003122  |             |             |
| 0.344692230 | 0.292821944 | 0.799451411 |                | 0.238123015  | 0.534333646   | 0.829386950  |             |             |
| 0.016921932 | 0.632783413 | 0.131847084 |                | 0.796229064  | 0.430377632   | 0.496657372  |             |             |
| 0.036978472 | 0.324420482 | 0.470633566 |                | 0.017369293  | 0.197071493   | 0.485844076  |             |             |
| 0.699457765 | 0.640379727 | 0.779222071 |                | 0.695775986  | 0.531651020   | 0.822605908  |             |             |
| 0.027245117 | 0.964140356 | 0.126629800 |                | 0.367606312  | 0.860803366   | 0.166484356  |             |             |
| 0.682510674 | 0.316082865 | 0.465272486 |                | 0.571749866  | 0.966057718   | 0.501430631  |             |             |
| 0.390009969 | 0.986565948 | 0.148656815 |                | 0.905499101  | 0.625971019   | 0.160661578  |             |             |
| 0.789608479 | 0.457766175 | 0.602712393 |                | 0.134479061  | 0.642229259   | 0.377019614  |             |             |
| 0.457712829 | 0.780047357 | 0.939957380 |                | 0.142854705  | 0.085969947   | 0.153858721  |             |             |
| 0.887570858 | 0.738234222 | 0.374415398 |                | 0.696186125  | 0.292098612   | 0.724502608  |             |             |
| 0.133432075 | 0.616575837 | 0.271177053 |                | 0.125393897  | 0.536016583   | 0.435412735  |             |             |
| 0.597822666 | 0.780548394 | 0.067804433 |                | 0.383052617  | 0.626219332   | 0.071614303  |             |             |
| 0.532926687 | 0.915731966 | 0.604749203 |                | 0.040124595  | 0.962542713   | 0.392707199  |             |             |
| 0.145567805 | 0.124633744 | 0.254381984 |                | 0.699320436  | 0.005547497   | 0.736237586  |             |             |
| 0.667490411 | 0.573736370 | 0.265631407 |                | 0.363666326  | 0.313540608   | 0.043667498  |             |             |
| 0.044956140 | 0.190447196 | 0.594662189 |                | 0.028581450  | 0.658510506   | 0.403846800  |             |             |
| 0.705661416 | 0.531228244 | 0.931339741 |                | 0.007698770  | 0.306087822   | 0.730544806  |             |             |
| 0.391625404 | 0.847976863 | 0.273956001 |                | 0.668860555  | 0.630268633   | 0.069946796  |             |             |
| 0.529919744 | 0.209209993 | 0.594827294 |                | 0.315661073  | 0.963524520   | 0.363533318  |             |             |
| 0.204954103 | 0.284074754 | 0.928065717 |                | 0.896646440  | 0.100636333   | 0.452473223  |             |             |
| 0.885051608 | 0.890196621 | 0.266546845 |                | 0.237407029  | 0.768055439   | 0.143520549  |             |             |
| 0.061718214 | 0.470490545 | 0.601472557 |                | 0.907490134  | 0.418756396   | 0.485281527  |             |             |
| 0.732695997 | 0.775019169 | 0.936911225 |                | 0.558669984  | 0.728835821   | 0.798795879  |             |             |
| 0.401892096 | 0.147052675 | 0.259940475 |                | 0.245235816  | 0.059583593   | 0.133159399  |             |             |
| 0.791932046 | 0.954101741 | 0.601202965 |                | 0.919198036  | 0.750079513   | 0.160624936  |             |             |
| 0.212597623 | 0.519151688 | 0.934634924 |                | 0.568979025  | 0.429901779   | 0.794767082  |             |             |
| 0.479979455 | 0.278407782 | 0.927210927 |                | 0.793825209  | 0.874487817   | 0.763935030  |             |             |
| 0.395310462 | 0.492390454 | 0.488520682 |                | 0.788951576  | 0.507132351   | 0.776102245  |             |             |
| 0.546504378 | 0.514803767 | 0.405678719 |                | 0.800797820  | 0.541769803   | 0.095706105  |             |             |
| 0.710889697 | 0.656346083 | 0.531541765 |                | 0.457082003  | 0.844582617   | 0.106564052  |             |             |
| 0.530844331 | 0.594473779 | 0.648414552 |                | 0.123445883  | 0.199906260   | 0.433598578  |             |             |
| 0.243065566 | 0.410166681 | 0.335913509 |                | 0.479739875  | 0.870971203   | 0.776973069  |             |             |
| 0.418435246 | 0.386865139 | 0.255106956 |                | 0.146193743  | 0.172798201   | 0.077122025  |             |             |
| 0.659325302 | 0.937740505 | 0.254884213 |                | 0.808773696  | 0.535469055   | 0.435391843  |             |             |
| 0.654141724 | 0.658565938 | 0.268203855 |                | 0.624363720  | 0.103599980   | 0.500531375  |             |             |
| 0.300852239 | 0.579646289 | 0.603075564 |                | 0.141522169  | 0.220420942   | 0.753204823  |             |             |
| 0.285505146 | 0.288495362 | 0.586389005 |                | 0.453719348  | 0.905653656   | 0.445548683  |             |             |
| 0.547593892 | 0.566143930 | 0.520569563 |                | 0.474417001  | 0.211831853   | 0.756366611  |             |             |
| 0.398584366 | 0.451581448 | 0.368244827 |                | 0.519528459  | 0.863237798   | 0.571484447  |             |             |
| 0.656035781 | 0.797493637 | 0.262696952 |                | 0.130754963  | 0.523239434   | 0.770813644  |             |             |
| 0.291271895 | 0.433271244 | 0.590518415 |                | 0.809301555  | 0.850926340   | 0.567770123  |             |             |
|             |             |             |                | 0.483761668  | 0.160678849   | 0.421869606  |             |             |
|             |             |             |                | 0.051137978  | 0.543144941   | 0.112375200  |             |             |
|             |             |             |                | 0.461996883  | 0.192846358   | 0.089418940  |             |             |
|             |             |             |                | 0.268897325  |               |              |             |             |

|              |              |             |                                                                                                  |               |               |             |             |             |
|--------------|--------------|-------------|--------------------------------------------------------------------------------------------------|---------------|---------------|-------------|-------------|-------------|
| 0.795417070  | 0.423195601  | 0.706653237 | 0.630817533                                                                                      | 0.593671381   | 0.278674304   | 0.472000003 | 0.216199994 | 0.754199982 |
| 0.469709724  | 0.305242896  | 0.821281850 | 0.295464337                                                                                      | 0.461180389   | 0.584804893   | 0.811500013 | 0.867399991 | 0.432300001 |
| 0.909215748  | 0.864670575  | 0.162253097 |                                                                                                  |               |               | 0.130400002 | 0.525799990 | 0.768700004 |
| 0.471291423  | 0.297258765  | 0.030014550 | [Cu(μ <sub>3</sub> -O) <sub>2</sub> (H <sub>2</sub> O)] <sup>4+</sup> , Fig. 4, E = -1061.342 eV |               |               | 0.813799977 | 0.853699982 | 0.090099998 |
| 0.583469927  | 0.196704969  | 0.493746459 | 1.0                                                                                              |               |               | 0.482400000 | 0.167699993 | 0.420199990 |
| 0.135982126  | 0.638438880  | 0.161757767 | 13.6750001907                                                                                    | 0.0000000000  | 0.0000000000  | 0.153300002 | 0.545799971 | 0.114900000 |
| 0.031124517  | 0.433380604  | 0.497234523 | -6.8375000954                                                                                    | 11.8428975619 | 0.0000000000  | 0.462500006 | 0.194600001 | 0.089500003 |
| 0.373697251  | 0.096947923  | 0.158506513 | 0.0000000000                                                                                     | 0.0000000000  | 14.7670001984 | 0.266400009 | 0.440400004 | 0.789600015 |
| 0.238859713  | 0.535894990  | 0.829268992 | H Al Si O N Cu                                                                                   |               |               | 0.915300012 | 0.433899999 | 0.721300006 |
| 0.797023475  | 0.432495058  | 0.499362200 | 26 4 32 75 8 4                                                                                   |               |               | 0.252099991 | 0.757300019 | 0.407200009 |
| 0.016154258  | 0.198658645  | 0.485754400 | Direct                                                                                           |               |               | 0.274899989 | 0.132599995 | 0.403400004 |
| 0.696551561  | 0.533845127  | 0.825254679 | 0.734300017                                                                                      | 0.726199985   | 0.496100008   | 0.547900021 | 0.078299999 | 0.721800029 |
| 0.367467761  | 0.861877739  | 0.165652156 | 0.731599987                                                                                      | 0.668399990   | 0.595200002   | 0.233700007 | 0.396800011 | 0.083600000 |
| 0.570801616  | 0.964467227  | 0.500672936 | 0.745500028                                                                                      | 0.611400008   | 0.500699997   | 0.919000030 | 0.086599998 | 0.722199976 |
| 0.905192733  | 0.627378106  | 0.161406055 | 0.502099991                                                                                      | 0.612900019   | 0.678399980   | 0.580900013 | 0.412000000 | 0.067199998 |
| 0.133832887  | 0.643682539  | 0.377086669 | 0.462500006                                                                                      | 0.478700012   | 0.680299997   | 0.656599998 | 0.942399979 | 0.450500011 |
| 0.143386409  | 0.089496568  | 0.153596550 | 0.595000029                                                                                      | 0.574899971   | 0.685899973   | 0.341100007 | 0.659500003 | 0.799300015 |
| 0.697589993  | 0.292957634  | 0.723513305 | 0.208299994                                                                                      | 0.421600014   | 0.270200014   | 0.351000011 | 0.305099994 | 0.801500022 |
| 0.125398263  | 0.537587643  | 0.435453624 | 0.176899999                                                                                      | 0.338499993   | 0.360900015   | 0.018500000 | 0.630100012 | 0.130300000 |
| 0.382467657  | 0.627812624  | 0.072724253 | 0.208000004                                                                                      | 0.471300006   | 0.372000009   | 0.027600000 | 0.324699998 | 0.457300007 |
| 0.0399777864 | 0.965750873  | 0.386248827 | 0.331299990                                                                                      | 0.306499988   | 0.242699996   | 0.708800018 | 0.646099985 | 0.177939991 |
| 0.701347709  | 0.007601016  | 0.732454181 | 0.341100007                                                                                      | 0.415199995   | 0.186700001   | 0.028100001 | 0.971199989 | 0.137300000 |
| 0.362207621  | 0.312351465  | 0.041362666 | 0.455700010                                                                                      | 0.408699989   | 0.256599995   | 0.684800029 | 0.326700002 | 0.459600002 |
| 0.027888076  | 0.659055471  | 0.406061441 | 0.588299990                                                                                      | 0.700900018   | 0.212699994   | 0.388399988 | 0.988699973 | 0.149000004 |
| 0.007925801  | 0.307490468  | 0.731864989 | 0.589200020                                                                                      | 0.703100026   | 0.324999988   | 0.783599973 | 0.462099999 | 0.603600025 |
| 0.669122458  | 0.631268144  | 0.435453643 | 0.708999991                                                                                      | 0.767099977   | 0.268099993   | 0.479200006 | 0.784600019 | 0.935299993 |
| 0.320142090  | 0.967425346  | 0.362593919 | 0.557099998                                                                                      | 0.340999991   | 0.263999999   | 0.892700016 | 0.745299995 | 0.377900004 |
| 0.894173980  | 0.100028709  | 0.458332628 | 0.688000023                                                                                      | 0.417499989   | 0.227699995   | 0.130300000 | 0.614099979 | 0.273699997 |
| 0.236486390  | 0.768697500  | 0.144297436 | 0.659699976                                                                                      | 0.401100010   | 0.337300003   | 0.597899973 | 0.780099988 | 0.080700003 |
| 0.908256471  | 0.421656609  | 0.487695903 | 0.314799994                                                                                      | 0.625400007   | 0.659500003   | 0.543099999 | 0.933600008 | 0.602699995 |
| 0.558120787  | 0.726937413  | 0.791315019 | 0.387400001                                                                                      | 0.650500000   | 0.563399971   | 0.156499997 | 0.144500002 | 0.252099991 |
| 0.245435104  | 0.062574401  | 0.133607656 | 0.248699993                                                                                      | 0.598900020   | 0.561399996   | 0.877799988 | 0.583100021 | 0.267500013 |
| 0.919655919  | 0.751510322  | 0.157397255 | 0.367199987                                                                                      | 0.309100002   | 0.577600002   | 0.057200000 | 0.219500005 | 0.593599982 |
| 0.569649994  | 0.432048053  | 0.796881318 | 0.250999987                                                                                      | 0.246800005   | 0.640699983   | 0.717400014 | 0.541400015 | 0.935500026 |
| 0.795556843  | 0.879901767  | 0.773717284 | 0.242500007                                                                                      | 0.257499993   | 0.529699981   | 0.398999989 | 0.853699982 | 0.272000001 |
| 0.788468063  | 0.505459666  | 0.780983329 | 0.588500023                                                                                      | 0.781300008   | 0.580399990   | 0.540099978 | 0.215700001 | 0.592199981 |
| 0.797375202  | 0.538753450  | 0.100018792 | 0.572399974                                                                                      | 0.794000030   | 0.480599999   | 0.201499999 | 0.287900001 | 0.924300015 |
| 0.453762352  | 0.847154319  | 0.100651219 | 0.244200006                                                                                      | 0.524299979   | 0.047600001   | 0.866999984 | 0.875299990 | 0.261999995 |
| 0.120610639  | 0.201308563  | 0.431067586 | 0.693400025                                                                                      | 0.758499980   | 0.820299983   | 0.067100003 | 0.457199991 | 0.601800025 |
| 0.483605951  | 0.78282313   | 0.778891206 | 0.141700000                                                                                      | 0.105899997   | 0.366899997   | 0.705900013 | 0.762399971 | 0.935800016 |
| 0.144854620  | 0.173753262  | 0.075292282 | 0.789300025                                                                                      | 0.966400027   | 0.489100009   | 0.406300008 | 0.155300006 | 0.258899987 |
| 0.808080256  | 0.535330951  | 0.434746534 | 0.238100007                                                                                      | 0.313600004   | 0.819800019   | 0.772800028 | 0.930800021 | 0.602900028 |
| 0.621773601  | 0.102356822  | 0.498007834 | 0.692200005                                                                                      | 0.533200026   | 0.043000001   | 0.210199997 | 0.521300018 | 0.933899999 |
| 0.142946213  | 0.222510785  | 0.751477718 | 0.356599987                                                                                      | 0.875500023   | 0.369300008   | 0.482300013 | 0.272300005 | 0.924300015 |
| 0.452247351  | 0.903311968  | 0.445510119 | 0.365900010                                                                                      | 0.104800001   | 0.362399995   | 0.388500005 | 0.485799998 | 0.480899990 |
| 0.475489378  | 0.213353038  | 0.756145954 | 0.906499982                                                                                      | 0.637099981   | 0.369100004   | 0.537299991 | 0.519200027 | 0.392899990 |
| 0.816282630  | 0.864642322  | 0.434977740 | 0.467999995                                                                                      | 0.761399984   | 0.826600015   | 0.543200016 | 0.735800028 | 0.528900005 |
| 0.131357208  | 0.524871051  | 0.770988047 | 0.474599987                                                                                      | 0.756500006   | 0.043499999   | 0.705200016 | 0.649800003 | 0.529299974 |
| 0.811734974  | 0.853069365  | 0.094142482 | 0.570999980                                                                                      | 0.973500013   | 0.708599985   | 0.520699978 | 0.554199994 | 0.652400017 |
| 0.484968275  | 0.167571485  | 0.421737224 | 0.233899996                                                                                      | 0.294299990   | 0.031300001   | 0.228499994 | 0.419600010 | 0.336800009 |
| 0.150673017  | 0.543578386  | 0.113199487 | 0.564700007                                                                                      | 0.199900001   | 0.698099971   | 0.381099999 | 0.392800003 | 0.235200003 |
| 0.462107003  | 0.193582386  | 0.089299552 | 0.907500029                                                                                      | 0.871500015   | 0.367000014   | 0.629599988 | 0.696200013 | 0.269199997 |
| 0.270224899  | 0.4407272027 | 0.788904190 | 0.029800000                                                                                      | 0.430200011   | 0.708199978   | 0.632399976 | 0.413700014 | 0.275900006 |
| 0.918709993  | 0.437454164  | 0.717026114 | 0.697499990                                                                                      | 0.759000003   | 0.041900001   | 0.312099993 | 0.595399976 | 0.595200002 |
| 0.248953462  | 0.754547417  | 0.407281756 | 0.795300007                                                                                      | 0.974500000   | 0.706300020   | 0.288500011 | 0.299100012 | 0.586499998 |
| 0.277632535  | 0.132951587  | 0.403279990 | 0.027300000                                                                                      | 0.204899997   | 0.701200008   | 0.540300012 | 0.557699978 | 0.516300023 |
| 0.550419211  | 0.074999183  | 0.720001936 | 0.794499993                                                                                      | 0.423900008   | 0.707400024   | 0.385500014 | 0.455700010 | 0.358000010 |
| 0.233836830  | 0.395525634  | 0.084779322 | 0.468100011                                                                                      | 0.306600004   | 0.822200000   | 0.629100025 | 0.554499984 | 0.282700002 |
| 0.920281112  | 0.089611597  | 0.737155914 | 0.908299983                                                                                      | 0.864099979   | 0.160799995   | 0.293199986 | 0.444799989 | 0.587400019 |
| 0.580868244  | 0.411422253  | 0.069041923 | 0.470699996                                                                                      | 0.297600001   | 0.029800000   |             |             |             |
| 0.656583905  | 0.931906581  | 0.455907196 | 0.582300007                                                                                      | 0.203299999   | 0.492100000   |             |             |             |
| 0.342448503  | 0.659006119  | 0.798507512 | 0.136500001                                                                                      | 0.638999999   | 0.164000005   |             |             |             |
| 0.350766242  | 0.300680250  | 0.802694738 | 0.028400000                                                                                      | 0.433999985   | 0.496699989   |             |             |             |
| 0.018727252  | 0.631219923  | 0.128146008 | 0.372999996                                                                                      | 0.097400002   | 0.157800004   |             |             |             |
| 0.026758673  | 0.321212411  | 0.461156487 | 0.236499995                                                                                      | 0.536899984   | 0.829100013   |             |             |             |
| 0.710286915  | 0.645778716  | 0.779599786 | 0.797299981                                                                                      | 0.436100006   | 0.498499990   |             |             |             |
| 0.028379843  | 0.971110165  | 0.136334017 | 0.019300001                                                                                      | 0.204400003   | 0.486900002   |             |             |             |
| 0.689161181  | 0.318569958  | 0.462114066 | 0.697399974                                                                                      | 0.535799980   | 0.826399982   |             |             |             |
| 0.388225555  | 0.987730384  | 0.149111614 | 0.368200004                                                                                      | 0.862999976   | 0.165700004   |             |             |             |
| 0.781130493  | 0.466213559  | 0.603549421 | 0.573000014                                                                                      | 0.977299988   | 0.497999996   |             |             |             |
| 0.475403756  | 0.780616879  | 0.938032329 | 0.904900014                                                                                      | 0.627699971   | 0.161799997   |             |             |             |
| 0.894965529  | 0.742856681  | 0.376141608 | 0.135000005                                                                                      | 0.647199988   | 0.378600001   |             |             |             |
| 0.129740268  | 0.647169101  | 0.271519870 | 0.142800003                                                                                      | 0.089800000   | 0.153200001   |             |             |             |
| 0.597274125  | 0.779025793  | 0.081473552 | 0.693799973                                                                                      | 0.294900000   | 0.723500013   |             |             |             |
| 0.538223803  | 0.919839084  | 0.605499804 | 0.125100002                                                                                      | 0.543200016   | 0.440800011   |             |             |             |
| 0.156167358  | 0.143669680  | 0.252700269 | 0.383300006                                                                                      | 0.629000008   | 0.068000004   |             |             |             |
| 0.879593968  | 0.581114173  | 0.266675860 | 0.035100002                                                                                      | 0.967400013   | 0.384200007   |             |             |             |
| 0.045672413  | 0.203733906  | 0.594246089 | 0.700699985                                                                                      | 0.012200000   | 0.732999980   |             |             |             |
| 0.713132858  | 0.538064718  | 0.934927940 | 0.361699998                                                                                      | 0.312500000   | 0.041700002   |             |             |             |
| 0.395658582  | 0.849461257  | 0.271893978 | 0.030700000                                                                                      | 0.667100012   | 0.403899997   |             |             |             |
| 0.542129099  | 0.212441936  | 0.593311906 | 0.006100000                                                                                      | 0.305900007   | 0.735800028   |             |             |             |
| 0.201623589  | 0.288047969  | 0.923991382 | 0.670199990                                                                                      | 0.632799983   | 0.079099998   |             |             |             |
| 0.872391164  | 0.879152060  | 0.264175624 | 0.316000015                                                                                      | 0.968200028   | 0.358099997   |             |             |             |
| 0.075631507  | 0.462814182  | 0.601306260 | 0.894599974                                                                                      | 0.104000000   | 0.469599992   |             |             |             |
| 0.707622349  | 0.761688352  | 0.938011289 | 0.236399993                                                                                      | 0.769800007   | 0.147100002   |             |             |             |
| 0.407121539  | 0.152463958  | 0.259956151 | 0.904900014                                                                                      | 0.419900000   | 0.482800000   |             |             |             |
| 0.795433879  | 0.944204390  | 0.604813695 | 0.556800008                                                                                      | 0.727400005   | 0.787199974   |             |             |             |
| 0.215442121  | 0.521060765  | 0.934319735 | 0.244900003                                                                                      | 0.062899999   | 0.132499993   |             |             |             |
| 0.486192197  | 0.275783509  | 0.924386561 | 0.920899987                                                                                      | 0.752200007   | 0.155699998   |             |             |             |
| 0.393642247  | 0.507022440  | 0.478877068 | 0.569999993                                                                                      | 0.432999998   | 0.801199973   |             |             |             |
| 0.542689681  | 0.544535995  | 0.390511650 | 0.793399990                                                                                      | 0.882000029   | 0.772599995   |             |             |             |
| 0.708835959  | 0.659611464  | 0.528815269 | 0                                                                                                |               |               |             |             |             |

|              |             |             |                                                                                            |               |               |                                                                                                              |               |               |
|--------------|-------------|-------------|--------------------------------------------------------------------------------------------|---------------|---------------|--------------------------------------------------------------------------------------------------------------|---------------|---------------|
| 0.364547282  | 0.102916807 | 0.363507360 | 0.410260588                                                                                | 0.507087469   | 0.485932887   | 0.919399977                                                                                                  | 0.751900017   | 0.151700005   |
| 0.899798989  | 0.635947108 | 0.373107165 | 0.544951916                                                                                | 0.501051605   | 0.384937853   | 0.572099984                                                                                                  | 0.426200002   | 0.797500014   |
| 0.462151110  | 0.756640136 | 0.827592075 | 0.586022437                                                                                | 0.698957205   | 0.423927575   | 0.775099993                                                                                                  | 0.858399987   | 0.736100018   |
| 0.469907075  | 0.752528489 | 0.043480296 | 0.721493244                                                                                | 0.686819553   | 0.570795417   | 0.790700018                                                                                                  | 0.507900000   | 0.773000002   |
| 0.570805192  | 0.966812789 | 0.706429064 | 0.512856603                                                                                | 0.550708175   | 0.666018963   | 0.793099999                                                                                                  | 0.537999988   | 0.101300001   |
| 0.230733946  | 0.292328447 | 0.031184498 | 0.241545886                                                                                | 0.433143854   | 0.350302786   | 0.447899997                                                                                                  | 0.842199981   | 0.099500000   |
| 0.561514139  | 0.194422022 | 0.698694646 | 0.368157297                                                                                | 0.374799371   | 0.248298362   | 0.124200001                                                                                                  | 0.204999998   | 0.429500014   |
| 0.902701557  | 0.869190872 | 0.367330998 | 0.621245980                                                                                | 0.662036300   | 0.240563124   | 0.480599999                                                                                                  | 0.867999971   | 0.773899972   |
| 0.027951520  | 0.425293475 | 0.709309697 | 0.632542372                                                                                | 0.386250883   | 0.268666029   | 0.141000003                                                                                                  | 0.168699995   | 0.070699997   |
| 0.703398168  | 0.769207656 | 0.031771921 | 0.313862354                                                                                | 0.606717408   | 0.595164478   | 0.805299997                                                                                                  | 0.535700023   | 0.438499987   |
| 0.799049199  | 0.977788866 | 0.701329648 | 0.284556359                                                                                | 0.308318406   | 0.579706550   | 0.617699981                                                                                                  | 0.104500003   | 0.504000008   |
| 0.024203783  | 0.195243493 | 0.702321112 | 0.556124985                                                                                | 0.598278046   | 0.537350476   | 0.142700002                                                                                                  | 0.218199998   | 0.746599972   |
| 0.792009056  | 0.417322725 | 0.707298279 | 0.393937647                                                                                | 0.455301642   | 0.367062896   | 0.447299987                                                                                                  | 0.907800019   | 0.447699994   |
| 0.466841847  | 0.301703662 | 0.822445035 | 0.622083247                                                                                | 0.523568034   | 0.271272361   | 0.469599992                                                                                                  | 0.205400005   | 0.759000003   |
| 0.905684948  | 0.862726092 | 0.161254629 | 0.297131091                                                                                | 0.457236171   | 0.581278205   | 0.814499974                                                                                                  | 0.874300003   | 0.434700012   |
| 0.467191607  | 0.298210174 | 0.031684253 | [Cu <sub>2</sub> (μ <sub>3</sub> -O)(μ-OH)(η-OH)] <sup>4+</sup> , Fig. 4, E = -1060.932 eV |               |               | 0.122100003                                                                                                  | 0.515699983   | 0.774600029   |
| 0.578352809  | 0.199785993 | 0.495320171 | 1.0                                                                                        |               |               | 0.810999990                                                                                                  | 0.854399979   | 0.091399997   |
| 0.133672982  | 0.637179255 | 0.165183038 | 13.6750001907                                                                              | 0.0000000000  | 0.0000000000  | 0.479600012                                                                                                  | 0.163299993   | 0.421799988   |
| 0.029478295  | 0.436173707 | 0.500086308 | -6.8375000954                                                                              | 11.8428975619 | 0.0000000000  | 0.150600001                                                                                                  | 0.546100020   | 0.112599999   |
| 0.372153103  | 0.096554995 | 0.158428818 | 0.0000000000                                                                               | 0.0000000000  | 14.7670001984 | 0.460500002                                                                                                  | 0.195899993   | 0.090200000   |
| 0.234766647  | 0.533779025 | 0.829312921 | H                                                                                          | Al            | Si            | O                                                                                                            | N             | Cu            |
| 0.794872880  | 0.432035118 | 0.498790175 | 26                                                                                         | 4             | 32            | 75                                                                                                           | 8             | 4             |
| 0.019165644  | 0.203116849 | 0.484135091 | Direct                                                                                     |               |               | 0.908900023                                                                                                  | 0.420899987   | 0.721800029   |
| 0.700414240  | 0.530288994 | 0.827087879 | 0.773299992                                                                                | 0.767000020   | 0.528199971   | 0.246299997                                                                                                  | 0.756099999   | 0.405999988   |
| 0.364776343  | 0.860863864 | 0.166137651 | 0.737600029                                                                                | 0.760800004   | 0.636600018   | 0.272899985                                                                                                  | 0.130600005   | 0.400000006   |
| 0.570308387  | 0.970142782 | 0.498557836 | 0.756500006                                                                                | 0.659099996   | 0.592499971   | 0.544200003                                                                                                  | 0.069100000   | 0.711899996   |
| 0.900811732  | 0.628179908 | 0.163458169 | 0.514100015                                                                                | 0.617399991   | 0.701399982   | 0.222700000                                                                                                  | 0.389999986   | 0.080399998   |
| 0.131753564  | 0.645303786 | 0.377918363 | 0.449099988                                                                                | 0.484499991   | 0.664300025   | 0.920000017                                                                                                  | 0.078599997   | 0.739099979   |
| 0.142294005  | 0.090798065 | 0.153917834 | 0.583999991                                                                                | 0.551900029   | 0.689899981   | 0.024800016                                                                                                  | 0.414499998   | 0.064499997   |
| 0.689725161  | 0.290156096 | 0.726582050 | 0.237499997                                                                                | 0.463800013   | 0.287200004   | 0.655799985                                                                                                  | 0.944599986   | 0.443199992   |
| 0.124203205  | 0.544689536 | 0.442937434 | 0.185800001                                                                                | 0.366299987   | 0.367500007   | 0.335299999                                                                                                  | 0.654699981   | 0.792800000   |
| 0.383192420  | 0.625188589 | 0.073191836 | 0.232899994                                                                                | 0.499900013   | 0.363299987   | 0.352699995                                                                                                  | 0.304300010   | 0.793099999   |
| 0.029617343  | 0.535776891 | 0.379163861 | 0.280000001                                                                                | 0.288399994   | 0.256399989   | 0.012600000                                                                                                  | 0.624899983   | 0.136299998   |
| 0.699948728  | 0.006187763 | 0.735306799 | 0.353399992                                                                                | 0.406599998   | 0.198699996   | 0.038500000                                                                                                  | 0.330599993   | 0.463499993   |
| 0.358681351  | 0.312829405 | 0.047645073 | 0.417199999                                                                                | 0.342299998   | 0.243699998   | 0.706799984                                                                                                  | 0.642099977   | 0.788699985   |
| 0.025602473  | 0.662926674 | 0.399654031 | 0.574000001                                                                                | 0.638499975   | 0.190200002   | 0.024800001                                                                                                  | 0.969900012   | 0.140300006   |
| 0.007470089  | 0.300938755 | 0.730357051 | 0.594200015                                                                                | 0.653500021   | 0.303499997   | 0.684700012                                                                                                  | 0.316500008   | 0.458200008   |
| 0.672447205  | 0.638361752 | 0.058331672 | 0.700900018                                                                                | 0.710200012   | 0.233999997   | 0.387699991                                                                                                  | 0.987299979   | 0.148000001   |
| 0.316181660  | 0.967078924 | 0.359135896 | 0.564700007                                                                                | 0.291500002   | 0.246700004   | 0.778500021                                                                                                  | 0.451499999   | 0.602500021   |
| 0.899721146  | 0.111940823 | 0.445116311 | 0.695200026                                                                                | 0.370000005   | 0.207599998   | 0.461499989                                                                                                  | 0.774399996   | 0.935500026   |
| 0.231646135  | 0.769253790 | 0.148805290 | 0.669200003                                                                                | 0.356099993   | 0.318599997   | 0.888000011                                                                                                  | 0.744199991   | 0.112599999   |
| 0.904392719  | 0.417673051 | 0.484564602 | 0.323599994                                                                                | 0.636699975   | 0.661300004   | 0.129299998                                                                                                  | 0.608799994   | 0.274399996   |
| 0.551504672  | 0.719372511 | 0.795826554 | 0.377000004                                                                                | 0.670300007   | 0.557299992   | 0.396200001                                                                                                  | 0.851000011   | 0.272100002   |
| 0.243784726  | 0.062573567 | 0.133817688 | 0.239700004                                                                                | 0.609799981   | 0.573099971   | 0.538200021                                                                                                  | 0.217299998   | 0.593599975   |
| 0.921962082  | 0.753716588 | 0.148437902 | 0.360900015                                                                                | 0.320899993   | 0.562699974   | 0.204500005                                                                                                  | 0.282799989   | 0.920199990   |
| 0.574267566  | 0.425284207 | 0.802309513 | 0.248600006                                                                                | 0.264099985   | 0.630400002   | 0.859300017                                                                                                  | 0.865000010   | 0.262800008   |
| 0.780305147  | 0.860744357 | 0.741076767 | 0.232899994                                                                                | 0.267800003   | 0.519500017   | 0.067699999                                                                                                  | 0.461600006   | 0.604700029   |
| 0.792778432  | 0.508136690 | 0.776571333 | 0.678499997                                                                                | 0.750999987   | 0.425199986   | 0.728600025                                                                                                  | 0.798399985   | 0.926999986   |
| 0.791871369  | 0.537980199 | 0.104090907 | 0.580699980                                                                                | 0.530600011   | 0.405000001   | 0.407099992                                                                                                  | 0.151899993   | 0.258800000   |
| 0.448082209  | 0.848214624 | 0.099977426 | 0.242100000                                                                                | 0.521499991   | 0.048900001   | 0.798600018                                                                                                  | 0.979700029   | 0.592199981   |
| 0.124988787  | 0.206219509 | 0.431329310 | 0.692900002                                                                                | 0.758800030   | 0.816299975   | 0.216399997                                                                                                  | 0.522199988   | 0.933899998   |
| 0.481615454  | 0.869510651 | 0.774302185 | 0.140100002                                                                                | 0.105400003   | 0.364899993   | 0.473100007                                                                                                  | 0.271600008   | 0.924899995   |
| 0.140913561  | 0.170133293 | 0.072727703 | 0.792200029                                                                                | 0.982100010   | 0.476200014   | 0.422800004                                                                                                  | 0.518800020   | 0.488799998   |
| 0.807326615  | 0.535777689 | 0.439352721 | 0.238900006                                                                                | 0.310200006   | 0.815199971   | 0.533200026                                                                                                  | 0.457899988   | 0.373600006   |
| 0.618397474  | 0.107374877 | 0.503184736 | 0.692600012                                                                                | 0.531799972   | 0.032099996   | 0.606899977                                                                                                  | 0.677699983   | 0.421900004   |
| 0.143025920  | 0.218350112 | 0.750111818 | 0.354200006                                                                                | 0.872300029   | 0.369599998   | 0.725300014                                                                                                  | 0.711899996   | 0.579100013   |
| 0.449420989  | 0.910631478 | 0.446824163 | 0.364800006                                                                                | 0.102300003   | 0.362399995   | 0.521799982                                                                                                  | 0.560699999   | 0.658699989   |
| 0.468774378  | 0.206217229 | 0.759154975 | 0.897700012                                                                                | 0.634100020   | 0.373209996   | 0.248300001                                                                                                  | 0.447699994   | 0.353100002   |
| 0.808152437  | 0.870063484 | 0.432179630 | 0.460399985                                                                                | 0.754700005   | 0.827199996   | 0.356599987                                                                                                  | 0.363900006   | 0.254799992   |
| 0.124026269  | 0.518586814 | 0.774125457 | 0.468800008                                                                                | 0.750899971   | 0.043499999   | 0.623499990                                                                                                  | 0.639100015   | 0.242599994   |
| 0.812672853  | 0.856580496 | 0.091286123 | 0.569599986                                                                                | 0.964999974   | 0.705799997   | 0.640200019                                                                                                  | 0.364699990   | 0.256799990   |
| 0.479780346  | 0.167009383 | 0.422546446 | 0.229900002                                                                                | 0.291200012   | 0.029200001   | 0.311100006                                                                                                  | 0.610199988   | 0.594600022   |
| 0.151413769  | 0.546929955 | 0.112502493 | 0.561399996                                                                                | 0.193100005   | 0.697799981   | 0.283499986                                                                                                  | 0.313300014   | 0.574000018   |
| 0.462279737  | 0.196813077 | 0.092218235 | 0.904799998                                                                                | 0.869700015   | 0.367100000   | 0.566900015                                                                                                  | 0.618900001   | 0.535899997   |
| 0.265060574  | 0.438046753 | 0.789470315 | 0.026200000                                                                                | 0.423200011   | 0.709100008   | 0.393299997                                                                                                  | 0.451999992   | 0.372399986   |
| 0.909753919  | 0.421266079 | 0.712500278 | 0.702300012                                                                                | 0.768400013   | 0.030999999   | 0.626299977                                                                                                  | 0.499100000   | 0.258199990   |
| 0.247561023  | 0.756410956 | 0.406521410 | 0.797500014                                                                                | 0.978999972   | 0.699599981   | 0.298099995                                                                                                  | 0.462599993   | 0.576799989   |
| 0.271635205  | 0.129334420 | 0.401979119 | 0.023200000                                                                                | 0.193700001   | 0.699800014   | [Cu <sub>2</sub> (μ <sub>3</sub> -O)(μ-OH)(η-OH)(H <sub>2</sub> O)] <sup>4+</sup> , Fig. 4, E = -1075.939 eV |               |               |
| 0.546257317  | 0.071538724 | 0.714268267 | 0.790600002                                                                                | 0.415300012   | 0.705999970   | 1.0                                                                                                          | 13.6750001907 | 0.0000000000  |
| 0.226556823  | 0.392725259 | 0.082849309 | 0.466399997                                                                                | 0.301899999   | 0.820100009   | -6.8375000954                                                                                                | 11.8428975619 | 0.0000000000  |
| 0.919802248  | 0.080922924 | 0.740693688 | 0.904600024                                                                                | 0.862299979   | 0.161400005   | 0.0000000000                                                                                                 | 0.0000000000  | 14.7670001984 |
| 0.578226030  | 0.415024072 | 0.064728931 | 0.466699988                                                                                | 0.298799992   | 0.030800000   | H                                                                                                            | Al            | Si            |
| 0.658369660  | 0.948210895 | 0.445402384 | 0.578299999                                                                                | 0.197500005   | 0.494599998   | 28                                                                                                           | 4             | 32            |
| 0.336803883  | 0.656063735 | 0.794533312 | 0.133399993                                                                                | 0.636799991   | 0.165299997   | O                                                                                                            | N             | Cu            |
| 0.8136378462 | 0.307544768 | 0.797038555 | 0.028999999                                                                                | 0.435699999   | 0.499500006   | Direct                                                                                                       | 28            | 4             |
| 0.012445392  | 0.624546230 | 0.136539450 | 0.371499985                                                                                | 0.095500000   | 0.157100007   | 0.776199996                                                                                                  | 0.763800025   | 0.529399991   |
| 0.036841951  | 0.329586148 | 0.465291560 | 0.234200001                                                                                | 0.531899989   | 0.828299999   | 0.739199996                                                                                                  | 0.758899987   | 0.637099981   |
| 0.706517398  | 0.641224086 | 0.787796319 | 0.793600023                                                                                | 0.429699987   | 0.496800005   | 0.757099986                                                                                                  | 0.655900002   | 0.594799995   |
| 0.025829887  | 0.972443819 | 0.145668671 | 0.018100001                                                                                | 0.202800006   | 0.481000006   | 0.515200019                                                                                                  | 0.618300021   | 0.701399982   |
| 0.684515893  | 0.320044130 | 0.460323513 | 0.698800027                                                                                | 0.529100001   | 0.825399995   | 0.446999997                                                                                                  | 0.485300004   | 0.664300025   |
| 0.387506783  | 0.987844467 | 0.148315370 | 0.364899993                                                                                | 0.860300004   | 0.165999994   | 0.581200004                                                                                                  | 0.548300028   | 0.691200018   |
| 0.780745506  | 0.456068426 | 0.604261816 | 0.569199979                                                                                | 0.967400014   | 0.498100013   | 0.239099994                                                                                                  | 0.457500011   | 0.292100012   |
| 0.463131666  | 0.776620209 | 0.935872972 | 0.899900019                                                                                | 0.626699984   | 0.163399994   | 0.184000000                                                                                                  | 0.357899994   | 0.372500000   |
| 0.891417682  | 0.746549428 | 0.389747739 | 0.130199999                                                                                | 0.645200014   | 0.377900004   | 0.237399995                                                                                                  | 0.494399995   | 0.397100002   |
| 0.129966229  |             |             |                                                                                            |               |               |                                                                                                              |               |               |

|             |             |             |             |             |             |             |             |              |
|-------------|-------------|-------------|-------------|-------------|-------------|-------------|-------------|--------------|
| 0.240700006 | 0.607599974 | 0.569800019 | 0.541599989 | 0.914699972 | 0.602100015 | 0.900358856 | 0.621195734 | 0.164287731  |
| 0.358799994 | 0.316599995 | 0.561600029 | 0.153300002 | 0.145500004 | 0.250200003 | 0.130356357 | 0.641520441 | 0.377625674  |
| 0.247299999 | 0.261799991 | 0.630200028 | 0.865000010 | 0.586000025 | 0.268999994 | 0.137399033 | 0.075920142 | 0.146047994  |
| 0.230299994 | 0.264099985 | 0.519400001 | 0.033700000 | 0.190300003 | 0.590799987 | 0.688953936 | 0.285863817 | 0.724224746  |
| 0.678600013 | 0.753600001 | 0.426099986 | 0.720399976 | 0.520699978 | 0.933099985 | 0.120894782 | 0.535033345 | 0.435294956  |
| 0.581600010 | 0.522099972 | 0.408199996 | 0.394800007 | 0.850799978 | 0.271899998 | 0.380103648 | 0.616289616 | 0.067471743  |
| 0.494100004 | 0.690400004 | 0.363900006 | 0.537000000 | 0.217199996 | 0.594200015 | 0.041148182 | 0.960901737 | 0.393367350  |
| 0.438100010 | 0.732500017 | 0.291999996 | 0.203999996 | 0.282400012 | 0.920199990 | 0.700691581 | 0.003657337 | 0.734129906  |
| 0.241400003 | 0.520900011 | 0.048599999 | 0.859399974 | 0.862900019 | 0.263300002 | 0.359784722 | 0.316084355 | 0.046255417  |
| 0.693400025 | 0.759400010 | 0.817600012 | 0.068099998 | 0.461899996 | 0.604600012 | 0.024119595 | 0.657146811 | 0.404201776  |
| 0.138999999 | 0.104800001 | 0.365099996 | 0.730599999 | 0.802999973 | 0.927500010 | 0.016118271 | 0.300099015 | 0.708626807  |
| 0.790499985 | 0.980300009 | 0.476399988 | 0.406800002 | 0.151899993 | 0.258599997 | 0.675397754 | 0.633108854 | 0.047106542  |
| 0.237499997 | 0.309199989 | 0.814999998 | 0.797900021 | 0.977299988 | 0.592199981 | 0.312275589 | 0.960991204 | 0.359577239  |
| 0.691299975 | 0.531400025 | 0.037200000 | 0.215800002 | 0.521799982 | 0.933499992 | 0.899295628 | 0.109254397 | 0.440802664  |
| 0.352100015 | 0.871800005 | 0.370000005 | 0.471700013 | 0.272899985 | 0.925100029 | 0.231854826 | 0.767872989 | 0.145200521  |
| 0.364300013 | 0.102600001 | 0.362300009 | 0.424499989 | 0.515900016 | 0.488799989 | 0.899769247 | 0.403937668 | 0.467196703  |
| 0.897000015 | 0.633199990 | 0.372700006 | 0.533800006 | 0.453099996 | 0.373299986 | 0.557654023 | 0.720337093 | 0.806232512  |
| 0.460200012 | 0.754400015 | 0.827400029 | 0.605199993 | 0.681900024 | 0.422600001 | 0.242864877 | 0.052343048 | 0.132312030  |
| 0.468300015 | 0.749899983 | 0.043200001 | 0.431600004 | 0.664600015 | 0.319599996 | 0.916458428 | 0.745299459 | 0.155769497  |
| 0.568599999 | 0.964399993 | 0.705900013 | 0.727100015 | 0.709299982 | 0.580100000 | 0.576503634 | 0.423299104 | 0.796675205  |
| 0.227899998 | 0.290399998 | 0.029500000 | 0.521300018 | 0.560199976 | 0.659300029 | 0.780485272 | 0.858567178 | 0.739750266  |
| 0.560800016 | 0.192800000 | 0.698300004 | 0.247500002 | 0.438600004 | 0.357699990 | 0.792947829 | 0.507779121 | 0.768162668  |
| 0.904600024 | 0.868799984 | 0.367599994 | 0.358900011 | 0.363599986 | 0.254599988 | 0.791776359 | 0.532895505 | 0.103940323  |
| 0.025900001 | 0.423200011 | 0.708899975 | 0.633400023 | 0.630999982 | 0.242899999 | 0.448533058 | 0.833421588 | 0.103845701  |
| 0.702899992 | 0.770299971 | 0.030999999 | 0.642799973 | 0.353599995 | 0.258300006 | 0.123446621 | 0.202444285 | 0.420741469  |
| 0.796700001 | 0.977800012 | 0.699699998 | 0.311800003 | 0.607800007 | 0.591799974 | 0.482102454 | 0.863877237 | 0.771544516  |
| 0.021700000 | 0.193000004 | 0.700100005 | 0.281899989 | 0.309899986 | 0.573300004 | 0.144619986 | 0.164284721 | 0.069564737  |
| 0.789900005 | 0.414999992 | 0.706099987 | 0.568099976 | 0.617799997 | 0.536199987 | 0.805507243 | 0.531941772 | 0.4392660423 |
| 0.465299994 | 0.301800013 | 0.819899976 | 0.394499987 | 0.448599994 | 0.372500002 | 0.620271206 | 0.102667131 | 0.501192868  |
| 0.904500008 | 0.862100005 | 0.161500007 | 0.631500006 | 0.489300013 | 0.260100007 | 0.145054206 | 0.213297904 | 0.744794727  |
| 0.465200007 | 0.299299985 | 0.031099999 | 0.298299998 | 0.459800005 | 0.575200021 | 0.448926777 | 0.905630946 | 0.445952684  |
| 0.577099979 | 0.196799994 | 0.495400012 |             |             |             | 0.469722450 | 0.201579183 | 0.759349287  |
| 0.132499993 | 0.636300027 | 0.165000007 |             |             |             | 0.818657696 | 0.871036530 | 0.433906823  |
| 0.028600000 | 0.435400009 | 0.499599993 |             |             |             | 0.127757281 | 0.514424562 | 0.766192198  |
| 0.371399999 | 0.096100003 | 0.156900004 |             |             |             | 0.800996602 | 0.843909979 | 0.104329892  |
| 0.233500004 | 0.531499982 | 0.828000009 |             |             |             | 0.479644120 | 0.158409610 | 0.420128852  |
| 0.792800009 | 0.428999990 | 0.497299999 |             |             |             | 0.153168082 | 0.544507265 | 0.112702712  |
| 0.015200000 | 0.200900003 | 0.481700003 |             |             |             | 0.458468467 | 0.193009794 | 0.088628337  |
| 0.697799981 | 0.527800024 | 0.826099992 |             |             |             | 0.265422821 | 0.432545006 | 0.785937965  |
| 0.363499999 | 0.860199988 | 0.165299997 |             |             |             | 0.907661676 | 0.408808112 | 0.734698832  |
| 0.567399979 | 0.966199994 | 0.498600006 |             |             |             | 0.245079160 | 0.752033293 | 0.409479797  |
| 0.899100006 | 0.626600027 | 0.163100004 |             |             |             | 0.276383549 | 0.132019326 | 0.395484477  |
| 0.129400000 | 0.643800020 | 0.377700001 |             |             |             | 0.546823621 | 0.066935159 | 0.714264151  |
| 0.140000001 | 0.088299997 | 0.151999995 |             |             |             | 0.214400417 | 0.382753313 | 0.075047404  |
| 0.689300001 | 0.287200004 | 0.726599991 |             |             |             | 0.921122313 | 0.080054842 | 0.737090588  |
| 0.123400003 | 0.544799984 | 0.443599999 |             |             |             | 0.578001320 | 0.411347955 | 0.065161340  |
| 0.381399989 | 0.622399986 | 0.071699999 |             |             |             | 0.657208025 | 0.940859139 | 0.442646533  |
| 0.032900002 | 0.966000021 | 0.380199999 |             |             |             | 0.341655821 | 0.650173903 | 0.791210711  |
| 0.698099971 | 0.400530000 | 0.735499978 |             |             |             | 0.356615216 | 0.304699212 | 0.790280104  |
| 0.356099993 | 0.312299997 | 0.048000000 |             |             |             | 0.012664706 | 0.621458828 | 0.311759152  |
| 0.022500001 | 0.660000026 | 0.400099993 |             |             |             | 0.042433374 | 0.325323045 | 0.476878971  |
| 0.004400000 | 0.298200011 | 0.728799999 |             |             |             | 0.710938811 | 0.641452432 | 0.799325049  |
| 0.674499989 | 0.639199972 | 0.052000001 |             |             |             | 0.023863176 | 0.959047556 | 0.122563884  |
| 0.314799994 | 0.966600001 | 0.357899994 |             |             |             | 0.679991722 | 0.315196753 | 0.460271001  |
| 0.895399988 | 0.112400003 | 0.440800011 |             |             |             | 0.392148256 | 0.984168112 | 0.144118324  |
| 0.230499998 | 0.768800020 | 0.149000004 |             |             |             | 0.795910537 | 0.447880417 | 0.601449847  |
| 0.903699994 | 0.416900009 | 0.483399987 |             |             |             | 0.454736739 | 0.775420487 | 0.935883224  |
| 0.550599992 | 0.718100011 | 0.795899987 |             |             |             | 0.890386939 | 0.740354896 | 0.383723706  |
| 0.243000001 | 0.661700001 | 0.133399993 |             |             |             | 0.130155101 | 0.612661421 | 0.272157103  |
| 0.917999996 | 0.751699984 | 0.149700001 |             |             |             | 0.593578517 | 0.770207107 | 0.062670574  |
| 0.571500003 | 0.425599992 | 0.796400011 |             |             |             | 0.544738114 | 0.915620863 | 0.600627363  |
| 0.775099993 | 0.857699990 | 0.736500025 |             |             |             | 0.138360262 | 0.121808097 | 0.246699095  |
| 0.790199995 | 0.507499993 | 0.773299992 |             |             |             | 0.871269524 | 0.578275561 | 0.762843757  |
| 0.791400015 | 0.537299991 | 0.102100000 |             |             |             | 0.042822149 | 0.173476383 | 0.586279929  |
| 0.446200013 | 0.840099990 | 0.100299999 |             |             |             | 0.726049185 | 0.513005137 | 0.933283508  |
| 0.120800003 | 0.202399999 | 0.430099994 |             |             |             | 0.392096043 | 0.845367789 | 0.272575468  |
| 0.480199993 | 0.867799997 | 0.774500012 |             |             |             | 0.533465564 | 0.207693636 | 0.593211055  |
| 0.138899997 | 0.167799994 | 0.070900001 |             |             |             | 0.206077591 | 0.276438117 | 0.917290926  |
| 0.803699970 | 0.534200013 | 0.438300014 |             |             |             | 0.881972611 | 0.879863262 | 0.264819533  |
| 0.616500000 | 0.103000000 | 0.505200028 |             |             |             | 0.052408263 | 0.471963197 | 0.600324988  |
| 0.141299993 | 0.216900006 | 0.746599972 |             |             |             | 0.745281279 | 0.808051765 | 0.931428015  |
| 0.446099997 | 0.906799972 | 0.447200000 |             |             |             | 0.408164054 | 0.145354375 | 0.256739914  |
| 0.469000012 | 0.204899997 | 0.759599984 |             |             |             | 0.798792124 | 0.970586061 | 0.917134848  |
| 0.813700020 | 0.873300016 | 0.434700012 |             |             |             | 0.212175280 | 0.519295573 | 0.929555893  |
| 0.121500000 | 0.515799999 | 0.774399996 |             |             |             | 0.472373575 | 0.270564139 | 0.924367487  |
| 0.810599983 | 0.855499983 | 0.092699997 |             |             |             | 0.440937519 | 0.536720514 | 0.504780114  |
| 0.479099989 | 0.163100004 | 0.421900004 |             |             |             | 0.502561152 | 0.467364669 | 0.350567341  |
| 0.150500000 | 0.546800017 | 0.111500002 |             |             |             | 0.619070232 | 0.676584363 | 0.428110808  |
| 0.460700005 | 0.196400002 | 0.090099998 |             |             |             | 0.397002518 | 0.627194762 | 0.364125311  |
| 0.262899995 | 0.435499996 | 0.786800027 |             |             |             | 0.745557189 | 0.712801337 | 0.584426761  |
| 0.908299983 | 0.420700014 | 0.721199989 |             |             |             | 0.536249280 | 0.570936382 | 0.666756332  |
| 0.243799999 | 0.756600022 | 0.406100005 |             |             |             | 0.203321368 | 0.417937160 | 0.311816126  |
| 0.272500008 | 0.131099999 | 0.400000006 |             |             |             | 0.337073296 | 0.336079508 | 0.244898364  |
| 0.543699980 | 0.068899997 | 0.712100029 |             |             |             | 0.630218089 | 0.649617076 | 0.240323752  |
| 0.219699994 | 0.388700008 | 0.080399998 |             |             |             | 0.635113895 | 0.370069563 | 0.263449490  |
| 0.918600023 | 0.078000002 | 0.739700019 |             |             |             | 0.299812913 | 0.604523778 | 0.591199458  |
| 0.575699985 | 0.415699985 | 0.065600000 |             |             |             | 0.290836006 | 0.317854047 | 0.562251210  |
| 0.654299974 | 0.943700016 | 0.443599999 |             |             |             | 0.585410714 | 0.625964642 | 0.545271754  |
| 0.335599989 | 0.653800011 | 0.792500019 |             |             |             | 0.359661579 | 0.453434795 | 0.535788661  |
| 0.351500005 | 0.303900003 | 0.792599976 |             |             |             | 0.622886717 | 0.505063951 | 0.258034289  |
| 0.001170000 | 0.624599993 | 0.136299998 |             |             |             | 0.302393526 | 0.465041846 | 0.571630359  |
| 0.035900000 | 0.328799993 | 0.464300007 |             |             |             |             |             |              |
| 0.706799984 | 0.641900003 | 0.792100012 |             |             |             |             |             |              |
| 0.024900001 | 0.969500005 | 0.141200006 |             |             |             |             |             |              |
| 0.684199989 | 0.315200001 | 0.458900005 |             |             |             |             |             |              |
| 0.387600005 | 0.987600029 | 0.148000002 |             |             |             |             |             |              |
| 0.776899993 | 0.451200008 | 0.602699995 |             |             |             |             |             |              |
| 0.461299986 | 0.774699986 | 0.935500026 |             |             |             |             |             |              |
| 0.888199985 | 0.743700027 | 0.389299989 |             |             |             |             |             |              |
| 0.128199995 | 0.608099997 | 0.273900002 |             |             |             |             |             |              |
| 0.596099973 | 0.779100001 | 0.069200002 |             |             |             |             |             |              |

TS6, Fig. 4, E = -1075.116 eV

1.0

13.6750001907

0.0000000000

0.0000000000

-6.8375000954

11.8428975619

0.0000000000

0.0000000000

|             |             |             |             |             |             |             |             |             |
|-------------|-------------|-------------|-------------|-------------|-------------|-------------|-------------|-------------|
| 0.776499987 | 0.761600018 | 0.644900024 | 0.277999997 | 0.132599995 | 0.392600000 | 0.930438936 | 0.882463574 | 0.375266492 |
| 0.795099974 | 0.662699997 | 0.592700005 | 0.550000012 | 0.066399999 | 0.715499997 | 0.038089257 | 0.437867463 | 0.713320851 |
| 0.524500012 | 0.629299998 | 0.703800023 | 0.212200001 | 0.380600005 | 0.071099997 | 0.707824111 | 0.767917931 | 0.043504123 |
| 0.485399991 | 0.498600006 | 0.672599971 | 0.922900021 | 0.080399998 | 0.733500004 | 0.810720325 | 0.985836387 | 0.709517658 |
| 0.612999976 | 0.584599972 | 0.716099977 | 0.579999983 | 0.407999992 | 0.064700000 | 0.034606531 | 0.208560109 | 0.706978261 |
| 0.162799999 | 0.398400009 | 0.211899996 | 0.658999979 | 0.939800022 | 0.441700011 | 0.809401393 | 0.431019098 | 0.713103235 |
| 0.127000004 | 0.327300012 | 0.310900003 | 0.347499996 | 0.647400004 | 0.790199995 | 0.474229723 | 0.307867318 | 0.824593425 |
| 0.157299995 | 0.461800009 | 0.307500005 | 0.358799994 | 0.303600013 | 0.788900018 | 0.915897787 | 0.868176222 | 0.166783094 |
| 0.240600005 | 0.252799988 | 0.239099994 | 0.013800000 | 0.619700015 | 0.128900006 | 0.473495573 | 0.306596696 | 0.038403604 |
| 0.351099998 | 0.351200014 | 0.179700002 | 0.043299999 | 0.322600007 | 0.478199989 | 0.589266419 | 0.206862226 | 0.499388814 |
| 0.370999992 | 0.298700005 | 0.275700003 | 0.716700017 | 0.642099977 | 0.804899991 | 0.137647390 | 0.636118054 | 0.172062799 |
| 0.562300026 | 0.650300026 | 0.196899995 | 0.020900000 | 0.955500007 | 0.113600001 | 0.046482809 | 0.447532803 | 0.498812050 |
| 0.611800015 | 0.683300018 | 0.302399993 | 0.678499997 | 0.315600008 | 0.460399985 | 0.378947765 | 0.096766189 | 0.162170589 |
| 0.697899997 | 0.730799973 | 0.213799998 | 0.393999994 | 0.981999993 | 0.141499996 | 0.249573022 | 0.542139530 | 0.830507994 |
| 0.556599975 | 0.309100002 | 0.251599997 | 0.802699983 | 0.445400000 | 0.600399971 | 0.813620627 | 0.434816599 | 0.498330861 |
| 0.960999985 | 0.388900012 | 0.225099996 | 0.450399995 | 0.775799990 | 0.935400009 | 0.035822581 | 0.217721432 | 0.487979293 |
| 0.650399983 | 0.370700002 | 0.332199991 | 0.891900003 | 0.737999976 | 0.377999991 | 0.702589810 | 0.538839757 | 0.827236533 |
| 0.333099991 | 0.641900003 | 0.648100019 | 0.130799994 | 0.612399995 | 0.270399988 | 0.370611936 | 0.867244303 | 0.171947092 |
| 0.328900009 | 0.648999989 | 0.535700023 | 0.595200002 | 0.769299984 | 0.055000000 | 0.576300502 | 0.966897845 | 0.502809107 |
| 0.210800007 | 0.589100003 | 0.595600009 | 0.547299981 | 0.917100012 | 0.599500000 | 0.906423628 | 0.631246746 | 0.167923868 |
| 0.374300003 | 0.336499989 | 0.544399977 | 0.132499993 | 0.109200001 | 0.245100006 | 0.137727425 | 0.651651800 | 0.380066246 |
| 0.264499992 | 0.264600009 | 0.612299979 | 0.875599980 | 0.573400021 | 0.269499987 | 0.142994225 | 0.092043005 | 0.158036456 |
| 0.244700000 | 0.275599986 | 0.503600001 | 0.046700001 | 0.168200001 | 0.582799971 | 0.708423853 | 0.302806705 | 0.732951971 |
| 0.698000014 | 0.735899985 | 0.425199986 | 0.730799973 | 0.508599997 | 0.933899999 | 0.142735496 | 0.562799096 | 0.450854570 |
| 0.516399980 | 0.537599981 | 0.378199995 | 0.391400009 | 0.844299972 | 0.272000015 | 0.384989887 | 0.628003418 | 0.067184202 |
| 0.435000002 | 0.579200029 | 0.464399993 | 0.533699989 | 0.204099998 | 0.592899978 | 0.063090250 | 0.966949940 | 0.387306154 |
| 0.400900006 | 0.642899990 | 0.338699996 | 0.206799999 | 0.271400005 | 0.915799975 | 0.708641410 | 0.007942498 | 0.745516539 |
| 0.239700004 | 0.516099989 | 0.040300000 | 0.893999994 | 0.887499988 | 0.264400005 | 0.373653114 | 0.333478659 | 0.063509382 |
| 0.709299982 | 0.764999986 | 0.826799989 | 0.044199999 | 0.470299989 | 0.597299993 | 0.031228816 | 0.668694079 | 0.401992649 |
| 0.139400005 | 0.094400004 | 0.363499999 | 0.760599971 | 0.812200010 | 0.934300005 | 0.012553441 | 0.311479092 | 0.733098388 |
| 0.794700027 | 0.973699987 | 0.474599987 | 0.407200009 | 0.140200004 | 0.255499989 | 0.675242245 | 0.636977732 | 0.066091493 |
| 0.242200002 | 0.303499997 | 0.810999990 | 0.798900008 | 0.964600027 | 0.590600014 | 0.343809634 | 0.988398492 | 0.395683438 |
| 0.695400000 | 0.523100019 | 0.035999999 | 0.210500002 | 0.518299997 | 0.908417404 | 0.135926753 | 0.926710016 | 0.456179864 |
| 0.352499992 | 0.865599990 | 0.370999992 | 0.471700013 | 0.268299997 | 0.924000025 | 0.240007445 | 0.766791940 | 0.161990315 |
| 0.365099996 | 0.094999996 | 0.359899998 | 0.450800002 | 0.554600000 | 0.524399996 | 0.922546566 | 0.424045265 | 0.469709873 |
| 0.902300000 | 0.627300024 | 0.371600002 | 0.479000002 | 0.477100015 | 0.331999987 | 0.572784543 | 0.748865247 | 0.814674675 |
| 0.465799987 | 0.753600001 | 0.829599977 | 0.629599988 | 0.660000026 | 0.429699987 | 0.249075770 | 0.069709793 | 0.160729960 |
| 0.466699988 | 0.743399978 | 0.038800001 | 0.356700003 | 0.576300025 | 0.376300007 | 0.930806458 | 0.758880436 | 0.156434238 |
| 0.573400021 | 0.961499989 | 0.704200029 | 0.762799978 | 0.715399981 | 0.585799992 | 0.578419507 | 0.432072639 | 0.801353395 |
| 0.229800001 | 0.285200000 | 0.024700001 | 0.551500022 | 0.579599977 | 0.672699988 | 0.798381269 | 0.872070491 | 0.751678884 |
| 0.562699974 | 0.187800005 | 0.697499990 | 0.176499993 | 0.404500008 | 0.280699998 | 0.795661151 | 0.523883283 | 0.769488156 |
| 0.917200029 | 0.868099988 | 0.369800001 | 0.320499986 | 0.323500007 | 0.243900001 | 0.805630863 | 0.546639740 | 0.101124719 |
| 0.027100001 | 0.420500010 | 0.700699985 | 0.626900017 | 0.662199974 | 0.238900006 | 0.457624316 | 0.841525674 | 0.118017398 |
| 0.707099974 | 0.762600005 | 0.030600000 | 0.629299998 | 0.382299989 | 0.268000007 | 0.131450981 | 0.204121485 | 0.435292840 |
| 0.801999986 | 0.974099994 | 0.697899997 | 0.290100008 | 0.599300027 | 0.591000021 | 0.486266822 | 0.880432010 | 0.779141307 |
| 0.031099999 | 0.187299997 | 0.689400017 | 0.294099987 | 0.319599986 | 0.558700025 | 0.156744674 | 0.178361684 | 0.077156380 |
| 0.798699975 | 0.409900010 | 0.706700027 | 0.602400005 | 0.630900025 | 0.455080005 | 0.815269053 | 0.540143132 | 0.445190907 |
| 0.470800012 | 0.299899995 | 0.818599999 | 0.333200008 | 0.449600011 | 0.311100006 | 0.605475128 | 0.098185040 | 0.497356683 |
| 0.909600019 | 0.856999993 | 0.161799997 | 0.619300008 | 0.518000007 | 0.258500014 | 0.148599118 | 0.229432777 | 0.758880074 |
| 0.466600001 | 0.295700014 | 0.029600000 | 0.295700014 | 0.461199999 | 0.575800002 | 0.455476612 | 0.886430740 | 0.453489721 |
| 0.577499986 | 0.191499993 | 0.493400007 |             |             |             | 0.487220615 | 0.213076279 | 0.768391907 |
| 0.135100007 | 0.634500027 | 0.160500005 |             |             |             | 0.849936187 | 0.904729903 | 0.440226465 |
| 0.023600001 | 0.426899999 | 0.492500007 |             |             |             | 0.147447541 | 0.531903863 | 0.766593277 |
| 0.371699989 | 0.086400002 | 0.153400004 |             |             |             | 0.806983829 | 0.853459001 | 0.112825587 |
| 0.238399997 | 0.527770007 | 0.821399987 |             |             |             | 0.495213032 | 0.200868487 | 0.430378586 |
| 0.798200011 | 0.421799988 | 0.492599994 |             |             |             | 0.153473347 | 0.546151876 | 0.116123043 |
| 0.022900000 | 0.193599999 | 0.478100002 |             |             |             | 0.456928909 | 0.195598960 | 0.091190875 |
| 0.706700027 | 0.523699999 | 0.828299999 |             |             |             | 0.282792181 | 0.447229892 | 0.793483078 |
| 0.366499990 | 0.854200006 | 0.164399996 |             |             |             | 0.928665221 | 0.444618315 | 0.743434191 |
| 0.573000014 | 0.964900017 | 0.495200008 |             |             |             | 0.250112206 | 0.769235373 | 0.398814976 |
| 0.902400017 | 0.619099975 | 0.164700001 |             |             |             | 0.293180078 | 0.153453499 | 0.382186532 |
| 0.132100001 | 0.639299989 | 0.376800001 |             |             |             | 0.566779137 | 0.083394788 | 0.717680037 |
| 0.135399997 | 0.069200002 | 0.142900005 |             |             |             | 0.218800098 | 0.392922819 | 0.083331652 |
| 0.690299988 | 0.285800010 | 0.722899973 |             |             |             | 0.930617869 | 0.093197376 | 0.743806362 |
| 0.118000001 | 0.529699981 | 0.431499988 |             |             |             | 0.592337132 | 0.414746732 | 0.067364015 |
| 0.381199986 | 0.613900006 | 0.064300001 |             |             |             | 0.673542619 | 0.955733538 | 0.450243473 |
| 0.043200001 | 0.958800018 | 0.399300009 |             |             |             | 0.354897349 | 0.665303886 | 0.803379774 |
| 0.702400029 | 0.507200003 | 0.732999980 |             |             |             | 0.360042572 | 0.305014133 | 0.790718734 |
| 0.361799985 | 0.317699999 | 0.046300001 |             |             |             | 0.020122398 | 0.629568160 | 0.142788857 |
| 0.028200001 | 0.658800006 | 0.403899997 |             |             |             | 0.068717227 | 0.348994404 | 0.463446670 |
| 0.019200001 | 0.299299985 | 0.700399995 |             |             |             | 0.704400063 | 0.649663687 | 0.792694986 |
| 0.674399972 | 0.629199982 | 0.043099999 |             |             |             | 0.030695122 | 0.975097060 | 0.130978301 |
| 0.310999990 | 0.958100021 | 0.361400008 |             |             |             | 0.705602705 | 0.317495018 | 0.468437970 |
| 0.900300026 | 0.107000001 | 0.440100014 |             |             |             | 0.380636066 | 0.983030856 | 0.133727387 |
| 0.233799994 | 0.765900016 | 0.142100006 |             |             |             | 0.811286867 | 0.458960682 | 0.605401397 |
| 0.897099972 | 0.395999998 | 0.461199999 |             |             |             | 0.466787785 | 0.797693193 | 0.945754051 |
| 0.565999985 | 0.725899994 | 0.814800024 |             |             |             | 0.893115819 | 0.748818159 | 0.394395262 |
| 0.241200000 | 0.046000000 | 0.130500004 |             |             |             | 0.129428700 | 0.600880325 | 0.279829174 |
| 0.920199990 | 0.744199991 | 0.159600005 |             |             |             | 0.600762367 | 0.781685412 | 0.073089920 |
| 0.579400003 | 0.423299998 | 0.798500001 |             |             |             | 0.558108211 | 0.925360858 | 0.608570278 |
| 0.786400020 | 0.858600020 | 0.741400003 |             |             |             | 0.129477590 | 0.141987994 | 0.254386038 |
| 0.795499980 | 0.507200003 | 0.766300023 |             |             |             | 0.870362818 | 0.591257513 | 0.273226887 |
| 0.792200029 | 0.532299995 | 0.105400003 |             |             |             | 0.056374706 | 0.212600484 | 0.597829928 |
| 0.451499999 | 0.830500007 | 0.105599999 |             |             |             | 0.729449928 | 0.537390530 | 0.934425950 |
| 0.123800002 | 0.202199996 | 0.414499998 |             |             |             | 0.411135703 | 0.883248091 | 0.278242648 |
| 0.483599991 | 0.861400008 | 0.769500017 |             |             |             | 0.555008531 | 0.225255057 | 0.601313591 |
| 0.147400007 | 0.164000005 | 0.070799999 |             |             |             | 0.228663653 | 0.296021521 | 0.927609265 |
| 0.809800029 | 0.531300008 | 0.439500004 |             |             |             | 0.889324188 | 0.885635555 | 0.271038771 |
| 0.622600019 | 0.102799997 | 0.498299986 |             |             |             | 0.066040806 | 0.468738467 | 0.606386364 |
| 0.146300003 | 0.211300001 | 0.743099988 |             |             |             | 0.748963475 | 0.802968860 | 0.942108333 |
| 0.450800002 | 0.905099988 | 0.444900006 |             |             |             | 0.432681233 | 0.137968838 | 0.262660235 |
| 0.472400010 | 0.201399997 | 0.759199977 |             |             |             | 0.807787001 | 0.980100334 | 0.601809978 |
| 0.819299996 | 0.867799997 | 0.431199998 |             |             |             | 0.214171678 | 0.523267508 | 0.933646560 |
| 0.131899998 | 0.513199985 | 0.759800017 |             |             |             |             |             |             |

|                               |               |               |                                                   |               |               |             |             |             |
|-------------------------------|---------------|---------------|---------------------------------------------------|---------------|---------------|-------------|-------------|-------------|
| 0.347630233                   | 0.437247962   | 0.408296138   | 0.156408951                                       | 0.179187447   | 0.076217078   | 0.811130702 | 0.998641491 | 0.488589376 |
| 0.527134657                   | 0.416933894   | 0.525499761   | 0.814821184                                       | 0.540216208   | 0.444438666   | 0.255797416 | 0.325305462 | 0.817338765 |
| 0.298742861                   | 0.406123132   | 0.594955087   | 0.606285751                                       | 0.100083217   | 0.497147232   | 0.700196266 | 0.540743828 | 0.045409516 |
| 0.611855507                   | 0.675433457   | 0.522859514   | 0.150769755                                       | 0.229350224   | 0.757091165   | 0.367987543 | 0.889358342 | 0.378597260 |
| 0.345005572                   | 0.537008573   | 0.509544671   | 0.455303907                                       | 0.888354063   | 0.455006480   | 0.388663679 | 0.125258610 | 0.367470950 |
| TS7, Fig. 5, E = -1055.416 eV |               |               |                                                   |               |               |             |             |             |
| 1.0                           |               |               |                                                   |               |               |             |             |             |
| 13.6750001907                 | 0.0000000000  | 0.0000000000  | 0.146911055                                       | 0.535278440   | 0.768837154   | 0.473027617 | 0.760601878 | 0.050211102 |
| -6.8375000954                 | 11.8428975619 | 0.0000000000  | 0.807111621                                       | 0.854699075   | 0.112863623   | 0.584535778 | 0.979168236 | 0.714549839 |
| 0.0000000000                  | 0.0000000000  | 14.7670001984 | 0.495808035                                       | 0.203510612   | 0.429966569   | 0.245171160 | 0.307504386 | 0.034629982 |
| H                             | Al            | Si            | O                                                 | N             | Cu            |             |             |             |
| 28                            | 4             | 32            | 74                                                | 8             | 2             |             |             |             |
| Direct                        |               |               |                                                   |               |               |             |             |             |
| 0.133440793                   | 0.354538530   | 0.173720643   | 0.249103338                                       | 0.771727800   | 0.399069399   | 0.813596904 | 0.992767453 | 0.710749209 |
| 0.094229512                   | 0.244389027   | 0.247427762   | 0.292641968                                       | 0.154288352   | 0.382038832   | 0.037908491 | 0.215425193 | 0.707650661 |
| 0.999185443                   | 0.284646988   | 0.214986399   | 0.567439914                                       | 0.084895484   | 0.719436288   | 0.809646189 | 0.436759859 | 0.710693598 |
| 0.583760023                   | 0.798739493   | 0.257563263   | 0.217227146                                       | 0.393500417   | 0.082162641   | 0.479586869 | 0.317945391 | 0.824092865 |
| 0.722823262                   | 0.851073563   | 0.274522841   | 0.932238281                                       | 0.095513530   | 0.743187368   | 0.912380278 | 0.873652458 | 0.169450969 |
| 0.631564021                   | 0.745073795   | 0.344107658   | 0.591757715                                       | 0.416297436   | 0.068059154   | 0.474215895 | 0.314864933 | 0.039272081 |
| 0.646165967                   | 0.875038624   | 0.353172183   | 0.673101187                                       | 0.956493258   | 0.450995773   | 0.588747025 | 0.211177781 | 0.499495059 |
| 0.102320425                   | 0.367468864   | 0.285306394   | 0.357386291                                       | 0.666296959   | 0.799803674   | 0.139153734 | 0.641992748 | 0.171132028 |
| 0.804381847                   | 0.793022692   | 0.531965792   | 0.361800313                                       | 0.307950467   | 0.789200544   | 0.053358693 | 0.452473849 | 0.504305720 |
| 0.772264361                   | 0.769014657   | 0.641726017   | 0.020167967                                       | 0.630234957   | 0.143268391   | 0.376493573 | 0.101430260 | 0.161932915 |
| 0.799228847                   | 0.681251049   | 0.583076477   | 0.067118585                                       | 0.348772168   | 0.460029364   | 0.253342062 | 0.548930645 | 0.828550339 |
| 0.541198313                   | 0.684772730   | 0.689241767   | 0.706850767                                       | 0.651528060   | 0.793528855   | 0.812994719 | 0.440266639 | 0.504240990 |
| 0.461647332                   | 0.549699306   | 0.669286549   | 0.029807350                                       | 0.976690412   | 0.133359775   | 0.034251835 | 0.221414387 | 0.488238275 |
| 0.594252348                   | 0.604459703   | 0.699319839   | 0.705842614                                       | 0.318881750   | 0.469295084   | 0.709077835 | 0.544263303 | 0.829622388 |
| 0.357089788                   | 0.659464777   | 0.639606237   | 0.380633771                                       | 0.985338986   | 0.134122998   | 0.372979373 | 0.874457955 | 0.169898867 |
| 0.387520462                   | 0.728217721   | 0.540920794   | 0.806238413                                       | 0.463517725   | 0.605732858   | 0.575361550 | 0.970869958 | 0.503542483 |
| 0.256487340                   | 0.632403910   | 0.565524578   | 0.464477301                                       | 0.795042157   | 0.945365369   | 0.908395350 | 0.640500724 | 0.166964397 |
| 0.350533843                   | 0.457668573   | 0.326989561   | 0.892286301                                       | 0.748272836   | 0.395188749   | 0.139874324 | 0.656047761 | 0.378536969 |
| 0.447745532                   | 0.454985470   | 0.390911877   | 0.129544243                                       | 0.601225197   | 0.280186653   | 0.142388761 | 0.098298565 | 0.158930162 |
| 0.312239528                   | 0.352170140   | 0.400081575   | 0.601356506                                       | 0.783809245   | 0.071569048   | 0.711740375 | 0.307079047 | 0.730847478 |
| 0.697721243                   | 0.652473152   | 0.399867982   | 0.559821784                                       | 0.928110719   | 0.609194517   | 0.141604945 | 0.567321122 | 0.451422990 |
| 0.460098326                   | 0.641817689   | 0.361922771   | 0.130213469                                       | 0.144878760   | 0.254796892   | 0.383780777 | 0.633828461 | 0.081015103 |
| 0.526387453                   | 0.382712692   | 0.476571769   | 0.870219231                                       | 0.592046738   | 0.273294359   | 0.057957556 | 0.970637262 | 0.387222300 |
| 0.625287414                   | 0.474906683   | 0.541007698   | 0.056108277                                       | 0.218560532   | 0.598064363   | 0.712287664 | 0.016882360 | 0.745176256 |
| 0.521810889                   | 0.361734301   | 0.584455252   | 0.730041027                                       | 0.538425386   | 0.935694218   | 0.375138193 | 0.343904793 | 0.061848067 |
| 0.289554417                   | 0.427291751   | 0.640399277   | 0.412389129                                       | 0.886250615   | 0.278553903   | 0.031773698 | 0.671059132 | 0.398755819 |
| 0.244999602                   | 0.340649307   | 0.553012669   | 0.554247439                                       | 0.224916905   | 0.601543725   | 0.016765041 | 0.317337811 | 0.741097391 |
| 0.380584806                   | 0.405040681   | 0.579943359   | 0.230328590                                       | 0.298450172   | 0.926016152   | 0.675867140 | 0.641939938 | 0.717886167 |
| 0.246798784                   | 0.529534936   | 0.047822084   | 0.884888411                                       | 0.883310914   | 0.272053421   | 0.350098848 | 0.996039152 | 0.398428559 |
| 0.712016761                   | 0.775527596   | 0.830954492   | 0.073506691                                       | 0.466070950   | 0.607076883   | 0.908412576 | 0.135509163 | 0.455556571 |
| 0.150869071                   | 0.111420766   | 0.368065953   | 0.751695275                                       | 0.804513693   | 0.942581832   | 0.243285790 | 0.771655619 | 0.160734102 |
| 0.811377823                   | 0.996799231   | 0.487816185   | 0.433167815                                       | 0.140936658   | 0.262602389   | 0.926469445 | 0.432152987 | 0.497545123 |
| 0.254349291                   | 0.320731223   | 0.818748653   | 0.807762384                                       | 0.980474114   | 0.602414012   | 0.575143993 | 0.749446929 | 0.816095173 |
| 0.700638413                   | 0.537195981   | 0.402292040   | 0.220365673                                       | 0.527213931   | 0.933109105   | 0.245485500 | 0.071157381 | 0.162232935 |
| 0.366949707                   | 0.885404069   | 0.380489379   | 0.468815088                                       | 0.281362057   | 0.931267798   | 0.931701720 | 0.767399728 | 0.153021500 |
| 0.387328953                   | 0.120792747   | 0.366963506   | 0.416898847                                       | 0.659325361   | 0.404749513   | 0.585442960 | 0.440376699 | 0.796651125 |
| 0.904269338                   | 0.638746321   | 0.376198232   | 0.622641444                                       | 0.642494559   | 0.409732372   | 0.800428629 | 0.879477859 | 0.754558742 |
| 0.474287868                   | 0.774029851   | 0.838217378   | 0.081904858                                       | 0.313578039   | 0.231255502   | 0.804937780 | 0.524237752 | 0.781030834 |
| 0.474321336                   | 0.758715570   | 0.049144316   | 0.644849598                                       | 0.817476094   | 0.305416733   | 0.808555007 | 0.552894354 | 0.100681625 |
| 0.583770871                   | 0.975825310   | 0.713747561   | 0.762326002                                       | 0.730296254   | 0.579688907   | 0.460844487 | 0.852146327 | 0.113689492 |
| 0.244544461                   | 0.303105354   | 0.035814669   | 0.540223360                                       | 0.616906881   | 0.657861888   | 0.131170884 | 0.206677511 | 0.438261479 |
| 0.581100404                   | 0.206879675   | 0.706265032   | 0.338692218                                       | 0.651538432   | 0.571797073   | 0.492690921 | 0.885828018 | 0.782847583 |
| 0.927092075                   | 0.880780995   | 0.376168489   | 0.365484029                                       | 0.437151760   | 0.390007704   | 0.159452736 | 0.183357835 | 0.075819857 |
| 0.040846322                   | 0.439064652   | 0.713858128   | 0.539558351                                       | 0.423557490   | 0.537387371   | 0.817146719 | 0.538680851 | 0.440557897 |
| 0.708344519                   | 0.769405961   | 0.043503907   | 0.310902506                                       | 0.415317804   | 0.576404154   | 0.600292683 | 0.099999592 | 0.494036943 |
| 0.812191486                   | 0.988078415   | 0.710030973   | 0.599049807                                       | 0.641121447   | 0.534813881   | 0.153075576 | 0.232431620 | 0.755611658 |
| 0.036477350                   | 0.211299777   | 0.707312405   | 0.357870549                                       | 0.541410983   | 0.487946630   | 0.456706554 | 0.886762440 | 0.451018721 |
| 0.809321225                   | 0.432626158   | 0.712361038   | 2[Cu(OH)] <sup>+</sup> , Fig. 5, E = -1056.066 eV |               |               |             |             |             |
| 0.474930227                   | 0.310209155   | 0.824905396   | 1.0                                               |               |               |             |             |             |
| 0.914896905                   | 0.868805766   | 0.167897463   | 13.6750001907                                     | 0.0000000000  | 0.0000000000  | 0.804933786 | 0.860151529 | 0.114010870 |
| 0.472777039                   | 0.308484614   | 0.038589787   | -6.8375000954                                     | 11.8428975619 | 0.0000000000  | 0.497222632 | 0.211114854 | 0.429994762 |
| 0.589096308                   | 0.208130658   | 0.499269456   | 0.0000000000                                      | 0.0000000000  | 14.7670001984 | 0.149964720 | 0.550382495 | 0.112780072 |
| 0.138344705                   | 0.637884736   | 0.172716111   | H                                                 | Al            | Si            | O           | N           | Cu          |
| 0.047942705                   | 0.447685838   | 0.499880672   | 28                                                | 4             | 32            | 74          | 8           | 2           |
| 0.378527611                   | 0.098756947   | 0.162414894   | Direct                                            |               |               |             |             |             |
| 0.251408130                   | 0.544485033   | 0.829047799   | 0.131021068                                       | 0.357151806   | 0.173820958   | 0.933121204 | 0.451005727 | 0.716340423 |
| 0.813218355                   | 0.436387718   | 0.499739408   | 0.094778813                                       | 0.248751998   | 0.248398811   | 0.250011861 | 0.775700033 | 0.398090780 |
| 0.036437090                   | 0.218749166   | 0.487910122   | 0.997396708                                       | 0.286051631   | 0.216222240   | 0.292609096 | 0.157174632 | 0.382701814 |
| 0.703951716                   | 0.540248096   | 0.828727901   | 0.522059262                                       | 0.742633641   | 0.313487232   | 0.567146480 | 0.087723257 | 0.720429957 |
| 0.370749414                   | 0.869446099   | 0.172474027   | 0.653890014                                       | 0.811724842   | 0.260351568   | 0.216572538 | 0.396455586 | 0.082250781 |
| 0.576479435                   | 0.968887508   | 0.503393710   | 0.631492913                                       | 0.735045731   | 0.357481897   | 0.934224427 | 0.099271260 | 0.743914604 |
| 0.906794310                   | 0.632472634   | 0.168190673   | 0.636049986                                       | 0.860613346   | 0.361199558   |             |             |             |

|             |              |             |             |             |             |              |             |             |
|-------------|--------------|-------------|-------------|-------------|-------------|--------------|-------------|-------------|
| 0.431923807 | 0.144197702  | 0.262244850 | 0.926727712 | 0.433245152 | 0.498434812 | 0.695936084  | 0.650936961 | 0.413358599 |
| 0.809013307 | 0.984306335  | 0.603292882 | 0.574115336 | 0.749410987 | 0.816492081 | 0.378322691  | 0.617788613 | 0.201303840 |
| 0.230497703 | 0.534995907  | 0.933969200 | 0.244553730 | 0.073731676 | 0.162223756 | 0.546976566  | 0.403621525 | 0.485632241 |
| 0.476712286 | 0.294567674  | 0.931249022 | 0.931162953 | 0.768854737 | 0.152579382 | 0.620493412  | 0.439647794 | 0.579429030 |
| 0.387442559 | 0.649378479  | 0.327029586 | 0.584618270 | 0.439724386 | 0.797197759 | 0.484134793  | 0.369623303 | 0.585300028 |
| 0.625224411 | 0.620658636  | 0.423296064 | 0.799241364 | 0.879455984 | 0.754753470 | 0.282672167  | 0.426609993 | 0.525876701 |
| 0.080605127 | 0.3116680014 | 0.231770352 | 0.804392815 | 0.525147438 | 0.781475365 | 0.247962952  | 0.322645545 | 0.453534544 |
| 0.612158775 | 0.789308190  | 0.321084708 | 0.807320535 | 0.553950667 | 0.101510264 | 0.379674673  | 0.395192266 | 0.496009022 |
| 0.756493926 | 0.732940316  | 0.586727917 | 0.460405916 | 0.854912698 | 0.112740055 | 0.243930534  | 0.532673955 | 0.051875662 |
| 0.527827799 | 0.593180954  | 0.670393527 | 0.128686339 | 0.206276745 | 0.438807696 | 0.709130228  | 0.774612427 | 0.833795667 |
| 0.372152179 | 0.651539564  | 0.513110161 | 0.491930038 | 0.885885358 | 0.783460855 | 0.145745963  | 0.110630192 | 0.370242804 |
| 0.417444319 | 0.455710322  | 0.333285689 | 0.158291161 | 0.185408145 | 0.076636329 | 0.806880044  | 0.998573065 | 0.492559791 |
| 0.553548336 | 0.434040606  | 0.546587110 | 0.816340327 | 0.538222194 | 0.440521806 | 0.252662987  | 0.324523330 | 0.819962144 |
| 0.310116827 | 0.414936572  | 0.511348724 | 0.599200726 | 0.100006334 | 0.493677765 | 0.697481573  | 0.541189075 | 0.047470566 |
| 0.601609409 | 0.605699062  | 0.551353991 | 0.152164415 | 0.232348219 | 0.756639421 | 0.364097327  | 0.888115346 | 0.382563204 |
| 0.366969407 | 0.540424109  | 0.417682588 | 0.455691397 | 0.886347651 | 0.451146752 | 0.385267437  | 0.127729431 | 0.372427046 |
|             |              |             | 0.489057600 | 0.220199540 | 0.770265400 | 0.896642208  | 0.638755381 | 0.377645403 |
|             |              |             | 0.841580629 | 0.900953352 | 0.444682807 | 0.469652027  | 0.770829737 | 0.839983523 |
|             |              |             | 0.139739498 | 0.536634922 | 0.779096007 | 0.469886482  | 0.759731710 | 0.053075392 |
|             |              |             | 0.803988338 | 0.861265719 | 0.114302911 | 0.580849230  | 0.978088260 | 0.718145788 |
|             |              |             | 0.497464389 | 0.213607743 | 0.430427670 | 0.242261693  | 0.306772560 | 0.037465699 |
|             |              |             | 0.149139360 | 0.550638378 | 0.113516003 | 0.578236461  | 0.208930567 | 0.709525764 |
|             |              |             | 0.450791001 | 0.200581759 | 0.090062186 | 0.918744922  | 0.880065262 | 0.379842907 |
|             |              |             | 0.279354602 | 0.451567441 | 0.789922595 | 0.043802980  | 0.443764031 | 0.714661717 |
|             |              |             | 0.931331635 | 0.450030446 | 0.717060328 | 0.705706716  | 0.771361530 | 0.047124352 |
|             |              |             | 0.249238387 | 0.777190268 | 0.397023618 | 0.809753537  | 0.992242760 | 0.714705288 |
|             |              |             | 0.291125894 | 0.157257140 | 0.384812117 | 0.034454528  | 0.212748036 | 0.710106313 |
|             |              |             | 0.566732585 | 0.088323355 | 0.721764028 | 0.805555284  | 0.434660405 | 0.174253086 |
|             |              |             | 0.218407109 | 0.399213403 | 0.082645379 | 0.475491792  | 0.316433549 | 0.825995207 |
|             |              |             | 0.933049202 | 0.099419393 | 0.745426774 | 0.908975542  | 0.874561548 | 0.172295272 |
|             |              |             | 0.591468215 | 0.420477450 | 0.074986733 | 0.472108513  | 0.314687282 | 0.041690309 |
|             |              |             | 0.671039879 | 0.957540274 | 0.454012990 | 0.586798668  | 0.210019484 | 0.502007186 |
|             |              |             | 0.356843740 | 0.669339895 | 0.794992745 | 0.137765959  | 0.647863746 | 0.172123417 |
|             |              |             | 0.365712076 | 0.317259699 | 0.789935112 | 0.052148476  | 0.454929024 | 0.509210646 |
|             |              |             | 0.022626815 | 0.641333282 | 0.143815041 | 0.375314116  | 0.104348943 | 0.164507891 |
|             |              |             | 0.064320408 | 0.352712810 | 0.460065424 | 0.250681788  | 0.549154937 | 0.830904245 |
|             |              |             | 0.713361204 | 0.655884326 | 0.793268025 | 0.809866428  | 0.438745290 | 0.507801771 |
|             |              |             | 0.024781764 | 0.986643076 | 0.137448922 | 0.028570404  | 0.218714461 | 0.492375195 |
|             |              |             | 0.709262013 | 0.320038050 | 0.473077178 | 0.705365956  | 0.542998016 | 0.831319392 |
|             |              |             | 0.378467500 | 0.990279436 | 0.134328544 | 0.371045649  | 0.874936998 | 0.174087597 |
|             |              |             | 0.789752185 | 0.469942808 | 0.607591033 | 0.569639802  | 0.967337906 | 0.507268786 |
|             |              |             | 0.454762161 | 0.785904944 | 0.903483987 | 0.639463127  | 0.170417681 | 0.748917639 |
|             |              |             | 0.890071571 | 0.749890447 | 0.400096744 | 0.134257481  | 0.657396990 | 0.381309658 |
|             |              |             | 0.128990337 | 0.605457485 | 0.279062808 | 0.1421109871 | 0.098360844 | 0.160544306 |
|             |              |             | 0.599866450 | 0.787127435 | 0.066311307 | 0.707177579  | 0.305443674 | 0.735480130 |
|             |              |             | 0.556616545 | 0.932483733 | 0.610375524 | 0.137908503  | 0.567104101 | 0.451150090 |
|             |              |             | 0.134670049 | 0.155093640 | 0.256550729 | 0.382588595  | 0.632818282 | 0.089339271 |
|             |              |             | 0.869672060 | 0.601474941 | 0.271774828 | 0.051760741  | 0.966565490 | 0.388278842 |
|             |              |             | 0.052658718 | 0.222129777 | 0.599310100 | 0.708820105  | 0.017047929 | 0.748917639 |
|             |              |             | 0.722036898 | 0.539738357 | 0.938704789 | 0.372588307  | 0.342271775 | 0.066399261 |
|             |              |             | 0.412571490 | 0.893793583 | 0.276639432 | 0.024757680  | 0.670098364 | 0.400544792 |
|             |              |             | 0.553533554 | 0.227020383 | 0.602372050 | 0.013318637  | 0.316300005 | 0.737794638 |
|             |              |             | 0.230352700 | 0.301794767 | 0.925508022 | 0.672628820  | 0.641544461 | 0.076543109 |
|             |              |             | 0.880323112 | 0.881452441 | 0.274741888 | 0.352239490  | 0.998415530 | 0.398050984 |
|             |              |             | 0.096648298 | 0.472274005 | 0.610108078 | 0.901674032  | 0.135973319 | 0.459987581 |
|             |              |             | 0.753757477 | 0.802506745 | 0.239484131 | 0.778831601  | 0.778831601 | 0.160417810 |
|             |              |             | 0.429996222 | 0.146417797 | 0.262916267 | 0.925109088  | 0.434154510 | 0.500957906 |
|             |              |             | 0.808703244 | 0.985759139 | 0.603820443 | 0.569684625  | 0.744964480 | 0.820676386 |
|             |              |             | 0.233549997 | 0.538278937 | 0.935208082 | 0.243374780  | 0.067077734 | 0.155250952 |
|             |              |             | 0.476483822 | 0.294628501 | 0.931629360 | 0.925782084  | 0.766240418 | 0.159437567 |
|             |              |             | 0.390811592 | 0.646503389 | 0.303565085 | 0.582593501  | 0.437927723 | 0.798472123 |
|             |              |             | 0.621514082 | 0.617737234 | 0.424889416 | 0.794916630  | 0.878107905 | 0.757851541 |
|             |              |             | 0.095702708 | 0.332495362 | 0.328610595 | 0.802262306  | 0.523405313 | 0.784089625 |
|             |              |             | 0.612881839 | 0.788762093 | 0.322317302 | 0.806670368  | 0.553497553 | 0.101408280 |
|             |              |             | 0.753059566 | 0.733232677 | 0.587848544 | 0.456596404  | 0.850288510 | 0.116566449 |
|             |              |             | 0.523298800 | 0.590707719 | 0.431318769 | 0.121525288  | 0.201522440 | 0.438209087 |
|             |              |             | 0.379954845 | 0.647627175 | 0.490805775 | 0.490391761  | 0.884832680 | 0.787224650 |
|             |              |             | 0.422545493 | 0.452242583 | 0.308520049 | 0.157035425  | 0.182045296 | 0.076979257 |
|             |              |             | 0.551255822 | 0.432484537 | 0.549453080 | 0.811120152  | 0.536853850 | 0.454021182 |
|             |              |             | 0.316013217 | 0.414438456 | 0.487788379 | 0.593199730  | 0.095861547 | 0.495683372 |
|             |              |             | 0.599870622 | 0.603240550 | 0.553313136 | 0.149179652  | 0.231031805 | 0.759417951 |
|             |              |             | 0.372067273 | 0.537512660 | 0.392556280 | 0.451188892  | 0.881673753 | 0.454700321 |
|             |              |             |             |             |             | 0.486035138  | 0.218600169 | 0.772063851 |
|             |              |             |             |             |             | 0.837220430  | 0.899448335 | 0.446428001 |
|             |              |             |             |             |             | 0.135728216  | 0.533552945 | 0.783493161 |
|             |              |             |             |             |             | 0.802686512  | 0.861150503 | 0.115058482 |
|             |              |             |             |             |             | 0.496649295  | 0.213338763 | 0.432668746 |
|             |              |             |             |             |             | 0.152218059  | 0.558890343 | 0.113683105 |
|             |              |             |             |             |             | 0.453856051  | 0.202114418 | 0.092597589 |
|             |              |             |             |             |             | 0.276026130  | 0.450176835 | 0.791693330 |
|             |              |             |             |             |             | 0.928723156  | 0.448714882 | 0.719556987 |
|             |              |             |             |             |             | 0.243848920  | 0.777573049 | 0.403816700 |
|             |              |             |             |             |             | 0.286897629  | 0.153733507 | 0.396176040 |
|             |              |             |             |             |             | 0.561847925  | 0.085729152 | 0.721757352 |
|             |              |             |             |             |             | 0.217143029  | 0.398438573 | 0.082011275 |
|             |              |             |             |             |             | 0.930119991  | 0.098238043 | 0.748663425 |
|             |              |             |             |             |             | 0.590064704  | 0.420515507 | 0.076702334 |
|             |              |             |             |             |             | 0.666932523  | 0.954216301 | 0.456757218 |
|             |              |             |             |             |             | 0.354319572  | 0.668703258 | 0.794880271 |
|             |              |             |             |             |             | 0.363821000  | 0.317140013 | 0.789998293 |
|             |              |             |             |             |             | 0.019363202  | 0.641473651 | 0.148278013 |
|             |              |             |             |             |             | 0.062118530  | 0.350614429 | 0.469955117 |
|             |              |             |             |             |             | 0.710413158  | 0.654309034 | 0.793128669 |
|             |              |             |             |             |             | 0.023807123  | 0.983464777 | 0.140481571 |
|             |              |             |             |             |             | 0.708560050  | 0.317280442 | 0.475308478 |
|             |              |             |             |             |             | 0.389153630  | 0.995991588 | 0.142820731 |
|             |              |             |             |             |             | 0.785440207  | 0.466908008 | 0.610532641 |
|             |              |             |             |             |             | 0.450468153  | 0.781807125 | 0.948032558 |
|             |              |             |             |             |             | 0.882977307  | 0.746735454 | 0.400256664 |
|             |              |             |             |             |             | 0.134506181  | 0.614038765 | 0.280043811 |
|             |              |             |             |             |             | 0.596677065  | 0.783994019 | 0.070946142 |

[Cu(OH)]<sup>+</sup> + NH<sub>4</sub><sup>+</sup>, Fig. 5, E = -1056.0686 eV

|     |               |               |               |
|-----|---------------|---------------|---------------|
| 1.0 | 13.6750001907 | 0.0000000000  | 0.0000000000  |
|     | -6.8375000954 | 11.8428975619 | 0.0000000000  |
|     | 0.0000000000  | 0.0000000000  | 14.7670001984 |

|    |    |    |    |   |    |
|----|----|----|----|---|----|
| H  | Al | Si | O  | N | Cu |
| 28 | 4  | 32 | 74 | 8 | 2  |

Direct

|             |             |             |
|-------------|-------------|-------------|
| 0.140367150 | 0.365839779 | 0.176815838 |
| 0.105068043 | 0.262087107 | 0.255488604 |
| 0.012228928 | 0.307213366 | 0.229485229 |
| 0.524288356 | 0.742514193 | 0.306087852 |
| 0.662869275 | 0.814068377 | 0.265703827 |
| 0.627570152 | 0.732587874 | 0.360866249 |
| 0.632723451 | 0.858567059 | 0.363204330 |
| 0.126405016 | 0.392280370 | 0.288850933 |
| 0.787555754 | 0.791836321 | 0.536115646 |
| 0.759662867 | 0.777227759 | 0.646554291 |
| 0.803619683 | 0.698580027 | 0.596899033 |
| 0.521409094 | 0.660697043 | 0.694735467 |
| 0.444497555 | 0.523074269 | 0.683109045 |
| 0.576077282 | 0.584480524 | 0.718301535 |
| 0.419253767 | 0.649136782 | 0.550096810 |
| 0.417055488 | 0.729247391 | 0.467267007 |
| 0.298226267 | 0.625998616 | 0.505675375 |
| 0.419460922 | 0.466113031 | 0.240698189 |
| 0.506289601 | 0.490974605 | 0.327806026 |
| 0.386364758 | 0.366843253 | 0.318379313 |
| 0.702053010 | 0.647681653 | 0.413904577 |
| 0.378897876 | 0.621086597 | 0.240438998 |
| 0.548357970 | 0.405310780 | 0.484380454 |
| 0.322378400 | 0.440275520 | 0.577457666 |
| 0.487530708 | 0.367065072 | 0.584589660 |
| 0.276708186 | 0.429659635 | 0.540378749 |
| 0.257546723 | 0.334004194 | 0.464277625 |
| 0.383140117 | 0.411223769 | 0.514616907 |
| 0.247665152 | 0.535373753 | 0.056048322 |
| 0.712872505 | 0.777270615 | 0.831614614 |
| 0.148862362 | 0.114820698 | 0.369074732 |
| 0.810244322 | 0.999542224 | 0.489016622 |
| 0.254789293 | 0.325618476 | 0.818047285 |
| 0.699015439 | 0.541642725 | 0.046131328 |
| 0.367826998 | 0.890731215 | 0.378270075 |
| 0.388261020 | 0.127054796 | 0.368556589 |
| 0.903612435 | 0.642352340 | 0.375827223 |
| 0.479283959 | 0.773374200 | 0.837715030 |
| 0.472238034 | 0.762078643 | 0.050781202 |
| 0.583720624 | 0.979557037 | 0.175400100 |
| 0.244905010 | 0.308789879 | 0.035107158 |
| 0.581029296 | 0.210313857 | 0.07467854  |
| 0.923486322 | 0.882038414 | 0.378438056 |
| 0.045622993 | 0.443487674 | 0.371335872 |
| 0.708155453 | 0.773073554 | 0.044425793 |
| 0.812746227 | 0.993196785 | 0.711389661 |
| 0.036907781 | 0.215327159 | 0.708819270 |
| 0.808512270 | 0.437054843 | 0.711402774 |
| 0.478365481 | 0.317593545 | 0.824456990 |
| 0.911520600 | 0.874908566 | 0.169839144 |
| 0.473740011 | 0.314979047 | 0.039556805 |
| 0.588380516 | 0.211158596 | 0.499790281 |
| 0.138202086 | 0.642531097 | 0.171529904 |
| 0.053995967 | 0.454561800 | 0.505924702 |
| 0.375022113 | 0.102611534 | 0.162623420 |
| 0.252452791 | 0.549656689 | 0.829284853 |
| 0.812717021 | 0.440465987 | 0.504813552 |
| 0.033021469 | 0.222446591 | 0.489595711 |
| 0.707887471 | 0.544125378 | 0.830284476 |
| 0.372246802 | 0.875192940 | 0.170475304 |
| 0.574072957 | 0.970879555 | 0.504143178 |
| 0.908131540 | 0.641988610 | 0.167004481 |
| 0.138471290 | 0.657338023 | 0.379053384 |
| 0.411389400 | 0.100912265 | 0.160046607 |
| 0.709976196 | 0.307931870 | 0.732145846 |
| 0.141664654 | 0.569202006 | 0.452037126 |
| 0.383595735 | 0.636204302 | 0.085150443 |
| 0.056287654 | 0.970915973 | 0.387313992 |
| 0.711733985 | 0.016865773 | 0.746008456 |
| 0.374566764 | 0.343852699 | 0.062384699 |
| 0.030969463 | 0.672827482 | 0.400234044 |
| 0.016118750 | 0.317550272 | 0.741704047 |
| 0.674446583 | 0.642717123 | 0.072940916 |
| 0.513586461 | 0.998213828 | 0.399160266 |
| 0.906874597 | 0.137576520 | 0.456510305 |
| 0.242948338 | 0.771861732 | 0.161236852 |

|             |             |             |             |             |             |             |             |             |
|-------------|-------------|-------------|-------------|-------------|-------------|-------------|-------------|-------------|
| 0.554316163 | 0.929601371 | 0.613402069 | 0.135616094 | 0.564261258 | 0.449406415 | 0.756094038 | 0.778455079 | 0.653220773 |
| 0.143108651 | 0.151322678 | 0.257907331 | 0.380169719 | 0.633574307 | 0.089112468 | 0.798666239 | 0.698492825 | 0.603722394 |
| 0.861603677 | 0.595018208 | 0.274214178 | 0.050529182 | 0.963254690 | 0.387120634 | 0.505366206 | 0.662297606 | 0.692363620 |
| 0.050252996 | 0.212807372 | 0.601111531 | 0.706410766 | 0.016116397 | 0.748975694 | 0.436953753 | 0.524252892 | 0.692041039 |
| 0.719952524 | 0.541004956 | 0.939877868 | 0.371557862 | 0.340787590 | 0.069744751 | 0.568492055 | 0.596445739 | 0.728246987 |
| 0.406940967 | 0.881803155 | 0.281243861 | 0.020281777 | 0.660320342 | 0.386742592 | 0.407528073 | 0.603501618 | 0.506989241 |
| 0.553187490 | 0.227779850 | 0.604251027 | 0.012672196 | 0.316656023 | 0.735696554 | 0.405117184 | 0.677542210 | 0.421478331 |
| 0.230879962 | 0.300656617 | 0.927206933 | 0.670954883 | 0.640364707 | 0.077796727 | 0.285642505 | 0.590740919 | 0.471957624 |
| 0.873339772 | 0.880720973 | 0.276642740 | 0.355598450 | 0.999836028 | 0.395298898 | 0.404233277 | 0.420438439 | 0.217694581 |
| 0.097291149 | 0.480300516 | 0.612708032 | 0.897240341 | 0.138665140 | 0.468945742 | 0.494558960 | 0.442346841 | 0.300928324 |
| 0.749301612 | 0.799315214 | 0.945754170 | 0.235774353 | 0.780544877 | 0.152129844 | 0.372732580 | 0.321661621 | 0.294133753 |
| 0.423046559 | 0.152727142 | 0.266066700 | 0.923916459 | 0.431514025 | 0.502451897 | 0.688260078 | 0.627180815 | 0.422193140 |
| 0.804898262 | 0.983126462 | 0.607154727 | 0.567709804 | 0.744528353 | 0.824080110 | 0.401639491 | 0.633944809 | 0.193070531 |
| 0.236537039 | 0.543241203 | 0.937144935 | 0.241558433 | 0.066337898 | 0.153857291 | 0.547989130 | 0.406634182 | 0.501128733 |
| 0.473654032 | 0.294764638 | 0.933474779 | 0.931016743 | 0.768000484 | 0.154324830 | 0.623399854 | 0.438887894 | 0.594073832 |
| 0.356062949 | 0.612644732 | 0.967794073 | 0.580522537 | 0.436710924 | 0.800244033 | 0.485816717 | 0.373531044 | 0.601625025 |
| 0.615853488 | 0.623566210 | 0.424830973 | 0.794050455 | 0.878541946 | 0.761300862 | 0.334533513 | 0.409177214 | 0.538248479 |
| 0.161076173 | 0.394852847 | 0.277865827 | 0.799474418 | 0.522295356 | 0.784699857 | 0.243424803 | 0.308576494 | 0.468512923 |
| 0.623395562 | 0.795894682 | 0.324955970 | 0.807033360 | 0.553837240 | 0.101490423 | 0.372985363 | 0.334165931 | 0.474907815 |
| 0.748982072 | 0.732785642 | 0.589743435 | 0.455261052 | 0.851060629 | 0.118436396 | 0.241789147 | 0.532025278 | 0.054232869 |
| 0.519077539 | 0.589053214 | 0.671681941 | 0.113181449 | 0.195054188 | 0.438170612 | 0.707934737 | 0.776088893 | 0.838616788 |
| 0.375438958 | 0.632452071 | 0.461440742 | 0.487841964 | 0.883263469 | 0.788216531 | 0.143004790 | 0.108335868 | 0.374224395 |
| 0.419604689 | 0.433623433 | 0.291541308 | 0.154795989 | 0.182296425 | 0.087778110 | 0.803566277 | 0.996785045 | 0.494798899 |
| 0.549310088 | 0.433200270 | 0.549816251 | 0.810615361 | 0.533719718 | 0.445604950 | 0.249986142 | 0.324056476 | 0.824210346 |
| 0.313898355 | 0.403025746 | 0.472431004 | 0.589183688 | 0.093730263 | 0.497137934 | 0.694885254 | 0.539883018 | 0.048766192 |
| 0.596407831 | 0.603320241 | 0.553959310 | 0.145546407 | 0.229790390 | 0.766336024 | 0.359137923 | 0.882299423 | 0.385935605 |
| 0.361689717 | 0.514419436 | 0.370360792 | 0.449572623 | 0.879904151 | 0.454307139 | 0.382356467 | 0.126866832 | 0.375310659 |
|             |             |             | 0.483084649 | 0.217436627 | 0.737311383 | 0.891563654 | 0.636545897 | 0.379131347 |
|             |             |             | 0.837529123 | 0.901064336 | 0.446679175 | 0.466381013 | 0.772190213 | 0.843785048 |
|             |             |             | 0.132552564 | 0.532318175 | 0.786426902 | 0.468558937 | 0.763441563 | 0.052774094 |
|             |             |             | 0.801040351 | 0.858459890 | 0.117733657 | 0.578266740 | 0.977535367 | 0.720855176 |
|             |             |             | 0.495201498 | 0.213749647 | 0.434775889 | 0.240781620 | 0.307207972 | 0.042681471 |
|             |             |             | 0.148225367 | 0.559024155 | 0.112795874 | 0.575870991 | 0.207534134 | 0.712899625 |
|             |             |             | 0.453919590 | 0.201639220 | 0.094389051 | 0.917865813 | 0.875376761 | 0.384252071 |
|             |             |             | 0.274877101 | 0.450237006 | 0.792228162 | 0.040669478 | 0.442661881 | 0.717683733 |
|             |             |             | 0.926189363 | 0.447150081 | 0.721591890 | 0.704517186 | 0.771039128 | 0.048648153 |
|             |             |             | 0.237841472 | 0.779954553 | 0.413233012 | 0.807102919 | 0.989879966 | 0.716690481 |
|             |             |             | 0.282438010 | 0.148458496 | 0.403142959 | 0.031489920 | 0.212369710 | 0.714621902 |
|             |             |             | 0.558244050 | 0.083961323 | 0.725612462 | 0.803610146 | 0.435424596 | 0.715715528 |
|             |             |             | 0.218364790 | 0.399856716 | 0.089221545 | 0.471759081 | 0.314493120 | 0.828699350 |
|             |             |             | 0.927621186 | 0.098667718 | 0.750142038 | 0.907391667 | 0.870717585 | 0.174624530 |
|             |             |             | 0.589532375 | 0.419896632 | 0.077562995 | 0.469989330 | 0.311866999 | 0.044461372 |
|             |             |             | 0.665088117 | 0.952975035 | 0.458505690 | 0.583360434 | 0.206156239 | 0.503905118 |
|             |             |             | 0.350881696 | 0.668169916 | 0.798437893 | 0.137705952 | 0.647542715 | 0.174966544 |
|             |             |             | 0.361258626 | 0.316369474 | 0.793025970 | 0.049922936 | 0.452943444 | 0.510661066 |
|             |             |             | 0.014160450 | 0.633558273 | 0.166217953 | 0.371706009 | 0.105114885 | 0.168099716 |
|             |             |             | 0.064747378 | 0.350837618 | 0.475102693 | 0.248111291 | 0.547016799 | 0.833170652 |
|             |             |             | 0.707693934 | 0.653484881 | 0.794640362 | 0.807468891 | 0.435451984 | 0.508104384 |
|             |             |             | 0.020983305 | 0.985554516 | 0.146547288 | 0.024697075 | 0.217743090 | 0.497300267 |
|             |             |             | 0.707253158 | 0.314652354 | 0.476573557 | 0.700867236 | 0.542134345 | 0.833256602 |
|             |             |             | 0.390271604 | 0.998371363 | 0.150169119 | 0.365819782 | 0.871527255 | 0.176526397 |
|             |             |             | 0.782970667 | 0.463409156 | 0.611693740 | 0.565750122 | 0.963787138 | 0.508172631 |
|             |             |             | 0.448526770 | 0.783254921 | 0.949763238 | 0.900148153 | 0.640177310 | 0.172594979 |
|             |             |             | 0.886164129 | 0.746301651 | 0.410512149 | 0.134708941 | 0.657385945 | 0.383409292 |
|             |             |             | 0.161082834 | 0.627098382 | 0.280690730 | 0.140355483 | 0.099720560 | 0.164237618 |
|             |             |             | 0.595251024 | 0.783761263 | 0.071736842 | 0.704157948 | 0.306885332 | 0.737107635 |
|             |             |             | 0.550998807 | 0.929011345 | 0.614521265 | 0.136612386 | 0.565672994 | 0.453130394 |
|             |             |             | 0.147104889 | 0.153683588 | 0.260308862 | 0.380982608 | 0.635609806 | 0.086215645 |
|             |             |             | 0.845805407 | 0.600325584 | 0.275359482 | 0.050594162 | 0.963565111 | 0.387432277 |
|             |             |             | 0.054728933 | 0.210985228 | 0.604212403 | 0.705391586 | 0.102881490 | 0.751108408 |
|             |             |             | 0.718916237 | 0.540669560 | 0.686071596 | 0.369540036 | 0.337146670 | 0.072184511 |
|             |             |             | 0.392308503 | 0.866885364 | 0.282463133 | 0.017738242 | 0.657131732 | 0.391048193 |
|             |             |             | 0.552624047 | 0.226946250 | 0.606501102 | 0.010033404 | 0.315551311 | 0.742675364 |
|             |             |             | 0.231320724 | 0.306177050 | 0.931451917 | 0.668600261 | 0.639727592 | 0.076626472 |
|             |             |             | 0.869205713 | 0.868110120 | 0.278951377 | 0.356590182 | 0.998332977 | 0.391918451 |
|             |             |             | 0.096732400 | 0.485366911 | 0.614272833 | 0.895767731 | 0.137535125 | 0.468520403 |
|             |             |             | 0.748281896 | 0.798358321 | 0.947511673 | 0.234310165 | 0.779409647 | 0.154802799 |
|             |             |             | 0.417973518 | 0.158457652 | 0.268232971 | 0.923241258 | 0.432197183 | 0.499995977 |
|             |             |             | 0.803717911 | 0.979386628 | 0.609164298 | 0.569194138 | 0.749333024 | 0.830930233 |
|             |             |             | 0.232335091 | 0.537688136 | 0.230002856 | 0.066291124 | 0.152851923 | 0.310481939 |
|             |             |             | 0.471158355 | 0.293295115 | 0.935259879 | 0.932407796 | 0.768941104 | 0.151384085 |
|             |             |             | 0.383276016 | 0.629716754 | 0.262968540 | 0.578218281 | 0.436345994 | 0.801543593 |
|             |             |             | 0.617929041 | 0.619593799 | 0.430459440 | 0.793602586 | 0.876433611 | 0.760598838 |
|             |             |             | 0.181583330 | 0.399282873 | 0.289875388 | 0.797606289 | 0.525677025 | 0.782202899 |
|             |             |             | 0.624686480 | 0.788648784 | 0.327893734 | 0.804733634 | 0.553414464 | 0.102864631 |
|             |             |             | 0.747814417 | 0.732637167 | 0.593577325 | 0.455190897 | 0.851871789 | 0.119456902 |
|             |             |             | 0.514718056 | 0.588930130 | 0.674214184 | 0.113093376 | 0.194347888 | 0.442697912 |
|             |             |             | 0.379672557 | 0.626562297 | 0.453065723 | 0.485150307 | 0.882566988 | 0.787097991 |
|             |             |             | 0.428254068 | 0.432849109 | 0.282195956 | 0.151801854 | 0.182416230 | 0.080589756 |
|             |             |             | 0.545520306 | 0.431940764 | 0.554699063 | 0.806004226 | 0.530574143 | 0.443011165 |
|             |             |             | 0.311312795 | 0.396231145 | 0.459480524 | 0.587942362 | 0.091611892 | 0.493625909 |
|             |             |             | 0.595738351 | 0.601402402 | 0.558951735 | 0.144110277 | 0.229085058 | 0.766723573 |
|             |             |             | 0.339183837 | 0.500750661 | 0.354332268 | 0.446745127 | 0.876099885 | 0.456917614 |
|             |             |             |             |             |             | 0.482773602 | 0.217530444 | 0.774007797 |
|             |             |             |             |             |             | 0.837820351 | 0.901029527 | 0.447099864 |
|             |             |             |             |             |             | 0.134478644 | 0.533614159 | 0.784815669 |
|             |             |             |             |             |             | 0.798405588 | 0.856703699 | 0.120851919 |
|             |             |             |             |             |             | 0.494231403 | 0.212736815 | 0.434880078 |
|             |             |             |             |             |             | 0.148791164 | 0.558461607 | 0.114228271 |
|             |             |             |             |             |             | 0.453432232 | 0.199291497 | 0.094883837 |
|             |             |             |             |             |             | 0.274805665 | 0.449349880 | 0.792474866 |
|             |             |             |             |             |             | 0.925952315 | 0.448153257 | 0.724917233 |
|             |             |             |             |             |             | 0.235389978 | 0.779872477 | 0.413782388 |
|             |             |             |             |             |             | 0.281234205 | 0.145545214 | 0.405965239 |
|             |             |             |             |             |             | 0.562557161 | 0.086694747 | 0.713239140 |
|             |             |             |             |             |             | 0.220460668 | 0.400955886 | 0.090050519 |
|             |             |             |             |             |             | 0.926655293 | 0.096676476 | 0.750708282 |
|             |             |             |             |             |             | 0.587703466 | 0.418954283 | 0.078474805 |
|             |             |             |             |             |             | 0.663249075 | 0.950190961 | 0.459012598 |
|             |             |             |             |             |             | 0.352596432 | 0.667195678 | 0.799515128 |
|             |             |             |             |             |             | 0.359179616 | 0.313718438 | 0.793318450 |

[Cu(H<sub>2</sub>O)]<sup>2+</sup>, Fig. 5, E = -1055.9429 eV

|     |               |               |               |
|-----|---------------|---------------|---------------|
| 1.0 | 13.6750001907 | 0.0000000000  | 0.0000000000  |
|     | -6.8375000954 | 11.8428975619 | 0.0000000000  |
|     | 0.0000000000  | 0.0000000000  | 14.7670001984 |

|    |    |    |    |   |    |
|----|----|----|----|---|----|
| H  | Al | Si | O  | N | Cu |
| 28 | 4  | 32 | 74 | 8 | 2  |

|        |             |             |             |
|--------|-------------|-------------|-------------|
| Direct | 0.189846188 | 0.396620184 | 0.220627338 |
|        | 0.142999470 | 0.317279041 | 0.311802447 |
|        | 0.127510771 | 0.428924322 | 0.301691294 |

|             |             |              |
|-------------|-------------|--------------|
| 0.013040436 | 0.631965280 | 0.164451793  |
| 0.061931212 | 0.349979758 | 0.470711857  |
| 0.703600347 | 0.653237998 | 0.7972728300 |
| 0.018941198 | 0.986820459 | 0.149162576  |
| 0.706082523 | 0.312710971 | 0.478752106  |
| 0.388672471 | 0.996922910 | 0.156601980  |
| 0.786435425 | 0.466410905 | 0.610843301  |
| 0.444136977 | 0.788031936 | 0.950074136  |
| 0.887669504 | 0.746176422 | 0.414437920  |
| 0.155130208 | 0.623403072 | 0.282755047  |
| 0.595815420 | 0.786758959 | 0.066273503  |
| 0.551264703 | 0.932213187 | 0.615606189  |
| 0.150063992 | 0.155598715 | 0.262162834  |
| 0.848327339 | 0.605030477 | 0.275371939  |
| 0.050773311 | 0.216531828 | 0.605791986  |
| 0.717741668 | 0.537799716 | 0.941416442  |
| 0.391102105 | 0.859309196 | 0.284340054  |
| 0.548687100 | 0.219944879 | 0.606832147  |
| 0.231347337 | 0.305109233 | 0.932383001  |
| 0.869288445 | 0.863042831 | 0.280225545  |
| 0.091453701 | 0.477316737 | 0.614853621  |
| 0.754794359 | 0.800637662 | 0.949041426  |
| 0.414722681 | 0.160768494 | 0.268717945  |
| 0.802380383 | 0.979499876 | 0.609332502  |
| 0.230502635 | 0.535754740 | 0.939104855  |
| 0.469373524 | 0.292164743 | 0.936142266  |
| 0.413150966 | 0.646778826 | 0.261048526  |
| 0.611867905 | 0.611884117 | 0.435008496  |
| 0.195812881 | 0.417074174 | 0.291214406  |
| 0.803191850 | 0.785781264 | 0.329751194  |
| 0.748070300 | 0.733158588 | 0.594932079  |
| 0.513948441 | 0.593600690 | 0.678157032  |
| 0.361503214 | 0.599614322 | 0.451058149  |
| 0.410610676 | 0.407433212 | 0.285380006  |
| 0.552572370 | 0.434685260 | 0.566061735  |
| 0.327033669 | 0.374347568 | 0.475682974  |
| 0.594687998 | 0.601549745 | 0.563958049  |
| 0.345486522 | 0.477309227 | 0.366171628  |

Cu<sup>2+</sup>+ H<sub>2</sub>O, Fig. 5, E = -1055.966 eV

|                |               |               |               |
|----------------|---------------|---------------|---------------|
| 1.0            | 13.6750001907 | 0.0000000000  | 0.0000000000  |
|                | -6.8375000954 | 11.8428975619 | 0.0000000000  |
|                | 0.0000000000  | 0.0000000000  | 14.7670001984 |
| H Al Si O N Cu |               |               |               |
| 28 4 32 74 8 2 |               |               |               |
| Direct         |               |               |               |
| 0.213374987    | 0.403853238   | 0.226660684   |               |
| 0.133363202    | 0.363367349   | 0.318911016   |               |
| 0.201750144    | 0.497830749   | 0.289424658   |               |
| 0.564420104    | 0.744612217   | 0.294030309   |               |
| 0.709848046    | 0.809841275   | 0.297998875   |               |
| 0.629406691    | 0.713890731   | 0.379066467   |               |
| 0.640638471    | 0.844132245   | 0.374718070   |               |
| 0.408852339    | 0.737618864   | 0.271971703   |               |
| 0.812966670    | 0.789731205   | 0.544887245   |               |
| 0.758259237    | 0.778402448   | 0.656128168   |               |
| 0.799704432    | 0.698356211   | 0.604999602   |               |
| 0.504153073    | 0.666568518   | 0.691882610   |               |
| 0.435596287    | 0.528828800   | 0.695953369   |               |
| 0.566682220    | 0.602056921   | 0.733032525   |               |
| 0.407636851    | 0.598182380   | 0.499744058   |               |
| 0.389392436    | 0.631558895   | 0.394816101   |               |
| 0.282069683    | 0.578525066   | 0.467072099   |               |
| 0.399401188    | 0.407975703   | 0.226807818   |               |
| 0.486630440    | 0.423935711   | 0.310598552   |               |
| 0.371435612    | 0.300076425   | 0.292481154   |               |
| 0.682399750    | 0.608167291   | 0.427880764   |               |
| 0.402121603    | 0.647037327   | 0.202837542   |               |
| 0.545377135    | 0.544454231   | 0.511149943   |               |
| 0.629662037    | 0.442373306   | 0.599272966   |               |
| 0.492974609    | 0.374772102   | 0.615818088   |               |
| 0.355754197    | 0.396827519   | 0.550377429   |               |
| 0.244076237    | 0.291832834   | 0.495611131   |               |
| 0.367377728    | 0.304067135   | 0.483447224   |               |
| 0.242217749    | 0.531439781   | 0.055761725   |               |
| 0.708800554    | 0.776912808   | 0.842022419   |               |
| 0.142415121    | 0.107999288   | 0.374957055   |               |
| 0.803697884    | 0.995777071   | 0.496064991   |               |
| 0.249246508    | 0.323105842   | 0.825152040   |               |
| 0.693822920    | 0.538740575   | 0.050323766   |               |
| 0.358875751    | 0.880126774   | 0.386958778   |               |
| 0.381035894    | 0.123667426   | 0.376247823   |               |
| 0.892443776    | 0.636798978   | 0.380663186   |               |
| 0.466472954    | 0.772192657   | 0.845748246   |               |
| 0.467601001    | 0.762917340   | 0.054283895   |               |
| 0.578290701    | 0.976980805   | 0.271604168   |               |
| 0.239412874    | 0.305804044   | 0.043373954   |               |
| 0.575624049    | 0.206952199   | 0.713513076   |               |
| 0.918959081    | 0.874144793   | 0.386137933   |               |
| 0.039670691    | 0.440924853   | 0.719482660   |               |
| 0.703996837    | 0.771035314   | 0.050646439   |               |
| 0.807134509    | 0.988915384   | 0.718094409   |               |
| 0.030412704    | 0.211615756   | 0.715941787   |               |
| 0.803820491    | 0.435825020   | 0.716901243   |               |
| 0.471372759    | 0.313726246   | 0.829884768   |               |
| 0.906162322    | 0.868948342   | 0.175944090   |               |
| 0.469170153    | 0.310359269   | 0.045431290   |               |
| 0.582618773    | 0.204513669   | 0.504681945   |               |
| 0.135838479    | 0.644605160   | 0.175975338   |               |
| 0.048437715    | 0.450475782   | 0.511310875   |               |

|             |             |             |
|-------------|-------------|-------------|
| 0.369405329 | 0.103708841 | 0.168521374 |
| 0.248467967 | 0.546062946 | 0.834485829 |
| 0.807130396 | 0.434977800 | 0.508639753 |
| 0.023854898 | 0.216478944 | 0.498062789 |
| 0.699761629 | 0.541340470 | 0.835188031 |
| 0.364197820 | 0.870795250 | 0.176700950 |
| 0.565872610 | 0.962698936 | 0.508664846 |
| 0.899884105 | 0.640256703 | 0.173117965 |
| 0.133711889 | 0.654218137 | 0.384230375 |
| 0.138345629 | 0.099383920 | 0.165321350 |
| 0.703596711 | 0.307334274 | 0.737289727 |
| 0.135855198 | 0.564080715 | 0.455324173 |
| 0.380184352 | 0.635887444 | 0.089328632 |
| 0.051211059 | 0.963395000 | 0.387659639 |
| 0.705504179 | 0.012403975 | 0.751824856 |
| 0.367467523 | 0.333785981 | 0.569231212 |
| 0.017792467 | 0.655712366 | 0.392737955 |
| 0.007941606 | 0.313697368 | 0.745514810 |
| 0.667392135 | 0.638898969 | 0.076650150 |
| 0.354821950 | 0.995423317 | 0.392874688 |
| 0.895226419 | 0.136583507 | 0.468783468 |
| 0.23293715  | 0.776714981 | 0.157390073 |
| 0.921794593 | 0.429807454 | 0.467476696 |
| 0.570439935 | 0.750980437 | 0.835018277 |
| 0.238111988 | 0.066251382 | 0.153507680 |
| 0.931478262 | 0.768285692 | 0.149054334 |
| 0.577190518 | 0.435938656 | 0.802829266 |
| 0.793361247 | 0.875675738 | 0.762646019 |
| 0.796383739 | 0.525958657 | 0.782577038 |
| 0.803392231 | 0.552145839 | 0.104824670 |
| 0.454655826 | 0.852664351 | 0.120018646 |
| 0.112907276 | 0.191887036 | 0.446148306 |
| 0.485066473 | 0.881741643 | 0.787696481 |
| 0.149530098 | 0.181283489 | 0.081169285 |
| 0.805193722 | 0.529810905 | 0.463289787 |
| 0.589216232 | 0.091097087 | 0.493568301 |
| 0.143927395 | 0.228927761 | 0.766786695 |
| 0.446260124 | 0.875476480 | 0.458353102 |
| 0.482708395 | 0.217469662 | 0.774060731 |
| 0.838992774 | 0.901309133 | 0.447545379 |
| 0.135625035 | 0.532781959 | 0.784721076 |
| 0.795806170 | 0.85542762  | 0.124739416 |
| 0.492792040 | 0.210311979 | 0.435723245 |
| 0.147178113 | 0.556087792 | 0.114650160 |
| 0.452579409 | 0.197724894 | 0.095930032 |
| 0.275292248 | 0.448684186 | 0.793391168 |
| 0.925817192 | 0.448062956 | 0.727905035 |
| 0.235166088 | 0.776941359 | 0.329649389 |
| 0.280281842 | 0.143020749 | 0.406759083 |
| 0.563091576 | 0.086514965 | 0.731989264 |
| 0.220543534 | 0.400071800 | 0.091672435 |
| 0.926788926 | 0.095339194 | 0.752358615 |
| 0.586048782 | 0.418037146 | 0.080118567 |
| 0.663392901 | 0.948539972 | 0.902114108 |
| 0.353405744 | 0.666232049 | 0.801460207 |
| 0.358233571 | 0.312179297 | 0.794957459 |
| 0.012221246 | 0.631291986 | 0.164371833 |
| 0.061734717 | 0.348713845 | 0.469774365 |
| 0.701564193 | 0.652618647 | 0.801796734 |
| 0.016944738 | 0.986311793 | 0.151774824 |
| 0.704478085 | 0.312594593 | 0.480418622 |
| 0.384731829 | 0.994892955 | 0.156137839 |
| 0.788333118 | 0.467239290 | 0.61620784  |
| 0.442562342 | 0.787550390 | 0.951691151 |
| 0.890401423 | 0.746384978 | 0.418336868 |
| 0.150679290 | 0.617897213 | 0.283492059 |
| 0.595192313 | 0.786872685 | 0.066698179 |
| 0.551384687 | 0.932062626 | 0.616358638 |
| 0.149256542 | 0.155876026 | 0.263209492 |
| 0.849874735 | 0.607531011 | 0.276581645 |
| 0.048584118 | 0.216491580 | 0.606938779 |
| 0.717559934 | 0.535705507 | 0.943106532 |
| 0.393083155 | 0.861206472 | 0.462346464 |
| 0.546869755 | 0.217248410 | 0.607426941 |
| 0.229138613 | 0.303648412 | 0.933171153 |
| 0.869815052 | 0.858307779 | 0.282081455 |
| 0.087927021 | 0.472100407 | 0.615856707 |
| 0.757432103 | 0.803291917 | 0.952030778 |
| 0.412762254 | 0.158132628 | 0.269554585 |
| 0.803333521 | 0.978499770 | 0.610716105 |
| 0.229920849 | 0.533748209 | 0.940390885 |
| 0.469812930 | 0.290938139 | 0.937171996 |
| 0.418652326 | 0.671132505 | 0.267969251 |
| 0.610331178 | 0.603772461 | 0.440660685 |
| 0.207902789 | 0.426091671 | 0.292582750 |
| 0.636153102 | 0.778960288 | 0.334907979 |
| 0.748835206 | 0.732920945 | 0.597639620 |
| 0.512986422 | 0.597343504 | 0.681480289 |
| 0.352068603 | 0.574848294 | 0.446984619 |
| 0.403197408 | 0.385702968 | 0.292464048 |
| 0.555509090 | 0.434942842 | 0.575731814 |
| 0.329713792 | 0.352022946 | 0.491589606 |
| 0.594597042 | 0.600667477 | 0.569422364 |
| 0.323368818 | 0.434124887 | 0.508578548 |

[Cu<sub>2</sub>(μ-O)]<sup>2+</sup>+ ads(H<sub>2</sub>O), Fig. 6, E = -978.235 eV

|                |               |               |               |
|----------------|---------------|---------------|---------------|
| 1.0            | 13.6750001907 | 0.0000000000  | 0.0000000000  |
|                | -6.8375000954 | 11.8428975619 | 0.0000000000  |
|                | 0.0000000000  | 0.0000000000  | 14.7670001984 |
| Al Si O H N Cu |               |               |               |

|             |             |             |    |    |   |   |
|-------------|-------------|-------------|----|----|---|---|
| 4           | 3           | 2           | 75 | 16 | 4 | 2 |
| Direct      |             |             |    |    |   |   |
| 0.246725723 | 0.521957874 | 0.051329367 |    |    |   |   |
| 0.696000093 | 0.757411599 | 0.823220253 |    |    |   |   |
| 0.127553120 | 0.094510615 | 0.363047957 |    |    |   |   |
| 0.807546318 | 0.968573153 | 0.502953470 |    |    |   |   |
| 0.244551614 | 0.313469350 | 0.824306846 |    |    |   |   |
| 0.692828774 | 0.532291055 | 0.043716092 |    |    |   |   |
| 0.355299890 | 0.865017653 | 0.370180905 |    |    |   |   |
| 0.375419617 | 0.103318743 | 0.363055080 |    |    |   |   |
| 0.895114064 | 0.627356708 | 0.369238466 |    |    |   |   |
| 0.469073534 | 0.754456460 | 0.828407943 |    |    |   |   |
| 0.473889023 | 0.748010159 | 0.047231007 |    |    |   |   |
| 0.573823929 | 0.969509900 | 0.717333077 |    |    |   |   |
| 0.242075279 | 0.298232794 | 0.043028977 |    |    |   |   |
| 0.569231212 | 0.198279321 | 0.705471098 |    |    |   |   |
| 0.900231540 | 0.863095641 | 0.367556393 |    |    |   |   |
| 0.037054472 | 0.434957176 | 0.707374632 |    |    |   |   |
| 0.694840610 | 0.754489481 | 0.045580920 |    |    |   |   |
| 0.800668001 | 0.975129008 | 0.712584078 |    |    |   |   |
| 0.037790243 | 0.206007063 | 0.702108562 |    |    |   |   |
| 0.798502207 | 0.423058093 | 0.710452676 |    |    |   |   |
| 0.467476696 | 0.308318585 | 0.824084222 |    |    |   |   |
| 0.906307757 | 0.861225188 | 0.16211789  |    |    |   |   |
| 0.471487999 | 0.302066386 | 0.039931964 |    |    |   |   |
| 0.580731273 | 0.202064499 | 0.500264446 |    |    |   |   |
| 0.137032449 | 0.642334342 | 0.162855923 |    |    |   |   |
| 0.038349673 | 0.438756585 | 0.501753092 |    |    |   |   |
| 0.373337418 | 0.093396865 | 0.156109989 |    |    |   |   |
| 0.2415917   | 0.534745336 | 0.830261588 |    |    |   |   |
| 0.801395535 | 0.430033036 | 0.503555894 |    |    |   |   |
| 0.037068930 | 0.50622947  | 0.495685607 |    |    |   |   |
| 0.696505725 | 0.535623550 | 0.824995041 |    |    |   |   |
| 0.365352541 | 0.859459758 | 0.164640061 |    |    |   |   |
| 0.563711643 | 0.965791821 | 0.505167663 |    |    |   |   |
| 0.900791705 | 0.624328971 | 0.164268866 |    |    |   |   |
| 0.130513042 | 0.642909288 | 0.376608312 |    |    |   |   |
| 0.143620700 | 0.081008995 | 0.149253234 |    |    |   |   |
| 0.700335324 | 0.291787386 | 0.725105166 |    |    |   |   |
| 0.125016183 | 0.538728118 | 0.434122470 |    |    |   |   |
| 0.388279766 | 0.619787872 | 0.077722214 |    |    |   |   |
| 0.029723613 | 0.957567930 | 0.389592123 |    |    |   |   |
| 0.705499709 | 0.014023446 | 0.733018577 |    |    |   |   |
| 0.368661284 | 0.320297948 | 0.072882484 |    |    |   |   |
| 0.022658587 | 0.658339322 | 0.397677916 |    |    |   |   |
| 0.010360625 | 0.306865811 | 0.721109390 |    |    |   |   |
| 0.667508304 | 0.628733337 | 0.083729498 |    |    |   |   |
| 0.329649389 | 0.969951451 | 0.369083494 |    |    |   |   |
| 0.909114718 | 0.106580123 | 0.485833993 |    |    |   |   |
| 0.231683403 | 0.776018679 | 0.145717770 |    |    |   |   |
| 0.911057532 | 0.418857545 | 0.491005599 |    |    |   |   |
| 0.559399128 | 0.753777261 | 0.786696911 |    |    |   |   |
| 0.244206220 | 0.051459365 | 0.128407821 |    |    |   |   |
| 0.921141088 | 0.750916921 | 0.162041962 |    |    |   |   |
| 0.568535209 | 0.433914542 | 0.795938671 |    |    |   |   |
| 0.797221270 | 0.888590515 | 0.785957038 |    |    |   |   |
| 0.787591636 | 0.503675699 | 0.784136295 |    |    |   |   |
| 0.804428399 | 0.543557525 | 0.092503577 |    |    |   |   |
| 0.444128126 | 0.837090909 | 0.097242147 |    |    |   |   |
| 0.123609729 | 0.200411052 | 0.424434781 |    |    |   |   |
| 0.488179773 | 0.872118831 | 0.781953156 |    |    |   |   |
| 0.147942335 | 0.718235991 | 0.075624011 |    |    |   |   |
| 0.807397246 | 0.534226358 | 0.441855699 |    |    |   |   |
| 0.609391749 | 0.099895284 | 0.497164190 |    |    |   |   |
| 0.132830873 | 0.215633601 | 0.773774862 |    |    |   |   |
| 0.457508028 | 0.890500405 | 0.440258920 |    |    |   |   |
| 0.482577145 | 0.213551506 | 0.770151019 |    |    |   |   |
| 0.887856709 | 0.867847681 | 0.433865130 |    |    |   |   |
| 0.129467741 | 0.520245135 | 0.778293729 |    |    |   |   |
| 0.813181341 | 0.850011408 | 0.089916720 |    |    |   |   |
| 0.481259763 | 0.178747416 | 0.428006623 |    |    |   |   |
| 0.158175290 | 0.554868519 | 0.109622851 |    |    |   |   |
| 0.462344644 | 0.511598937 | 0.089319170 |    |    |   |   |
| 0.269251257 | 0.437519014 | 0.789921224 |    |    |   |   |
| 0.920713246 | 0.435963631 | 0.721626520 |    |    |   |   |
| 0.243859500 | 0.756739557 | 0.409350723 |    |    |   |   |
| 0.271093100 | 0.122798122 | 0.407410711 |    |    |   |   |
| 0.549511909 | 0.073707975 | 0.721088290 |    |    |   |   |
| 0.224893123 | 0.392202586 | 0.093204036 |    |    |   |   |
| 0.932838186 | 0.089464555 | 0.716325104 |    |    |   |   |
| 0.588206172 | 0.409799904 | 0.073678605 |    |    |   |   |
| 0.667293489 | 0.947853804 | 0.458658636 |    |    |   |   |
| 0.343427211 | 0.656872451 | 0.796818256 |    |    |   |   |
| 0.350663334 | 0.299517781 | 0.790911734 |    |    |   |   |
| 0.015468172 | 0.967212139 | 0.136227503 |    |    |   |   |
| 0.040136144 | 0.326891392 | 0.471112758 |    |    |   |   |
| 0.715134263 | 0.648833692 | 0.777915030 |    |    |   |   |
| 0.025435256 | 0.967711550 | 0.132774502 |    |    |   |   |
| 0.661778719 | 0.316721401 | 0.469951710 |    |    |   |   |
| 0.397916764 | 0.990214705 | 0.152907029 |    |    |   |   |
| 0.784320235 | 0.461041629 | 0.607714451 |    |    |   |   |
| 0.475067139 | 0.768910050 | 0.938161671 |    |    |   |   |
| 0.882389188 | 0.736778736 | 0.380527198 |    |    |   |   |
| 0.138768077 | 0.618068993 | 0.271653682 |    |    |   |   |
| 0.598893344 | 0.780600071 | 0.084623061 |    |    |   |   |
| 0.561629851 | 0.921684755 | 0.607874751 |    |    |   |   |
| 0.157772645 | 0.129106313 | 0.251027375 |    |    |   |   |
| 0.862762511 | 0.574541807 | 0.267636716 |    |    |   |   |
| 0.086297236 | 0.217169344 | 0.598812521 |    |    |   |   |
| 0.707343876 | 0.575503529 | 0.934678555 |    |    |   |   |
| 0.392309394 | 0.844406366 | 0.271169573 |    |    |   |   |

|             |             |             |             |             |             |             |             |             |
|-------------|-------------|-------------|-------------|-------------|-------------|-------------|-------------|-------------|
| 0.537317336 | 0.211867779 | 0.600353241 | 0.487828016 | 0.873797596 | 0.784938753 | 0.802718580 | 0.973898649 | 0.715435386 |
| 0.234291837 | 0.300929815 | 0.930702150 | 0.150014564 | 0.171421960 | 0.075650074 | 0.037485436 | 0.206932619 | 0.701610863 |
| 0.868981481 | 0.877872705 | 0.263180673 | 0.805355132 | 0.530698597 | 0.440759003 | 0.800290644 | 0.423464924 | 0.710440159 |
| 0.083286017 | 0.477467746 | 0.604388952 | 0.606004298 | 0.094940595 | 0.497646630 | 0.468356162 | 0.306934804 | 0.824321628 |
| 0.698930562 | 0.753415585 | 0.393056575 | 0.133135617 | 0.215750888 | 0.73872674  | 0.906391501 | 0.858198404 | 0.165343046 |
| 0.397008687 | 0.146723002 | 0.260132670 | 0.456261396 | 0.888025045 | 0.442708671 | 0.471212801 | 0.300354987 | 0.040698573 |
| 0.775791764 | 0.921384811 | 0.611639857 | 0.483218580 | 0.213297382 | 0.770322978 | 0.579289615 | 0.198197365 | 0.501428783 |
| 0.223689392 | 0.521113184 | 0.936232626 | 0.809169590 | 0.865832686 | 0.435230821 | 0.137209624 | 0.640825868 | 0.164101154 |
| 0.468746454 | 0.285858691 | 0.931340158 | 0.130853161 | 0.520776510 | 0.778754354 | 0.041466381 | 0.438262254 | 0.502558410 |
| 0.432393432 | 0.686648965 | 0.528500140 | 0.814461768 | 0.850119412 | 0.090399288 | 0.373921067 | 0.092002951 | 0.157563135 |
| 0.381550968 | 0.468970835 | 0.478441954 | 0.481054485 | 0.178730235 | 0.429224193 | 0.245377675 | 0.534273267 | 0.830626845 |
| 0.555863976 | 0.555688381 | 0.406575978 | 0.159122795 | 0.554804742 | 0.110065207 | 0.801510811 | 0.427543461 | 0.504184365 |
| 0.641981721 | 0.892980814 | 0.409246385 | 0.462368548 | 0.191513702 | 0.090078570 | 0.035296530 | 0.206265971 | 0.495720565 |
| 0.292030513 | 0.168627799 | 0.462388843 | 0.270761251 | 0.437805623 | 0.790234625 | 0.696766257 | 0.535191715 | 0.825387359 |
| 0.397680074 | 0.712148130 | 0.573169410 | 0.921309233 | 0.436744124 | 0.722245991 | 0.366502583 | 0.858390927 | 0.167944208 |
| 0.734341935 | 0.610383987 | 0.510255456 | 0.242286563 | 0.755731463 | 0.409537017 | 0.559859514 | 0.956824899 | 0.509143233 |
| 0.715008259 | 0.721972406 | 0.532999337 | 0.270014107 | 0.119472422 | 0.407702625 | 0.900485694 | 0.620569289 | 0.164745882 |
| 0.701084077 | 0.647407949 | 0.626981497 | 0.550955296 | 0.073566578 | 0.721264720 | 0.128617257 | 0.640731514 | 0.377370387 |
| 0.726001441 | 0.607289732 | 0.526187420 | 0.225167677 | 0.391896516 | 0.093273081 | 0.143412322 | 0.078750983 | 0.715097424 |
| 0.390095592 | 0.492029458 | 0.656859457 | 0.923890352 | 0.090462446 | 0.715557933 | 0.704172432 | 0.291858763 | 0.727822721 |
| 0.504271090 | 0.490403801 | 0.691174448 | 0.588510334 | 0.409811318 | 0.073970184 | 0.125433028 | 0.537900865 | 0.434208333 |
| 0.505388021 | 0.611145437 | 0.685861349 | 0.667213082 | 0.945415199 | 0.459143251 | 0.388174385 | 0.618751228 | 0.082510196 |
| 0.243764967 | 0.396023929 | 0.250853688 | 0.346111417 | 0.656873941 | 0.797564864 | 0.031125216 | 0.948806107 | 0.389074564 |
| 0.211545929 | 0.337979794 | 0.354985565 | 0.350658983 | 0.298193306 | 0.790914297 | 0.705031276 | 0.007958452 | 0.740722299 |
| 0.224737808 | 0.463212162 | 0.336693555 | 0.016081693 | 0.626932859 | 0.136155397 | 0.367621750 | 0.318335354 | 0.072812423 |
| 0.545744011 | 0.438494474 | 0.203535729 | 0.038225088 | 0.325092188 | 0.470927238 | 0.019647220 | 0.654367626 | 0.398813933 |
| 0.445214689 | 0.552998338 | 0.190911427 | 0.714011133 | 0.649246633 | 0.778648555 | 0.009936567 | 0.307582438 | 0.722021639 |
| 0.559960186 | 0.560774088 | 0.236590236 | 0.026215775 | 0.966893315 | 0.134815112 | 0.669438243 | 0.627444148 | 0.084735334 |
| 0.683587134 | 0.641617358 | 0.558547199 | 0.692551851 | 0.312658876 | 0.470157743 | 0.343025446 | 0.973411977 | 0.378265977 |
| 0.476521969 | 0.534533143 | 0.652587712 | 0.397833079 | 0.989812255 | 0.153822139 | 0.905956507 | 0.105018772 | 0.489376068 |
| 0.257714838 | 0.412841260 | 0.319226503 | 0.783689022 | 0.459010988 | 0.607141316 | 0.233277604 | 0.774236381 | 0.148506075 |
| 0.473628998 | 0.512455046 | 0.233784944 | 0.474507779 | 0.768694162 | 0.940306902 | 0.914692760 | 0.420119882 | 0.495073378 |
| 0.524456978 | 0.551833451 | 0.526660383 | 0.881207824 | 0.734352529 | 0.380632341 | 0.567509353 | 0.735837579 | 0.791410446 |
| 0.415529937 | 0.486429632 | 0.357806712 | 0.138233557 | 0.616667449 | 0.272003233 | 0.245071605 | 0.051161900 | 0.129664496 |
|             |             |             | 0.599999666 | 0.780985475 | 0.085777067 | 0.918384790 | 0.746312320 | 0.165146157 |
|             |             |             | 0.543157697 | 0.919663250 | 0.610043526 | 0.569320321 | 0.432766259 | 0.796388686 |
|             |             |             | 0.158316433 | 0.130206719 | 0.521493335 | 0.807371020 | 0.889750361 | 0.787445038 |
|             |             |             | 0.862987459 | 0.573067248 | 0.267198622 | 0.788340867 | 0.504961550 | 0.782766461 |
|             |             |             | 0.087177061 | 0.218048111 | 0.598836303 | 0.804825187 | 0.540404558 | 0.092218399 |
|             |             |             | 0.707474589 | 0.537467718 | 0.934657335 | 0.446989626 | 0.836551189 | 0.102098688 |
|             |             |             | 0.393420786 | 0.843486547 | 0.272333354 | 0.116698921 | 0.190563262 | 0.424951881 |
|             |             |             | 0.537929952 | 0.210921928 | 0.600648642 | 0.485376835 | 0.874382973 | 0.788243949 |
|             |             |             | 0.234634414 | 0.301094800 | 0.933116734 | 0.148106515 | 0.168833956 | 0.076833494 |
|             |             |             | 0.868055701 | 0.875878274 | 0.263940752 | 0.803060472 | 0.524755657 | 0.439570487 |
|             |             |             | 0.083261907 | 0.476749569 | 0.604604065 | 0.594871640 | 0.087810785 | 0.496531457 |
|             |             |             | 0.700045168 | 0.754817486 | 0.939904630 | 0.132728830 | 0.216165587 | 0.772956789 |
|             |             |             | 0.397001922 | 0.145636782 | 0.454045922 | 0.454045922 | 0.876147926 | 0.446203540 |
|             |             |             | 0.775306046 | 0.920499861 | 0.612918139 | 0.485043168 | 0.212577000 | 0.771337330 |
|             |             |             | 0.226203889 | 0.522174656 | 0.936662257 | 0.811514258 | 0.865803242 | 0.437511981 |
|             |             |             | 0.469130218 | 0.286036432 | 0.931549966 | 0.133666337 | 0.520358622 | 0.778485835 |
|             |             |             | 0.431783676 | 0.669175744 | 0.521353841 | 0.814946175 | 0.849093139 | 0.092481546 |
|             |             |             | 0.357156128 | 0.475856721 | 0.472775161 | 0.482521623 | 0.186722159 | 0.430401236 |
|             |             |             | 0.543691278 | 0.581311405 | 0.407599121 | 0.158646211 | 0.553754866 | 0.110304952 |
|             |             |             | 0.640008271 | 0.885853946 | 0.462699741 | 0.190244108 | 0.090505950 | 0.090505950 |
|             |             |             | 0.288566619 | 0.160627738 | 0.464984506 | 0.274331808 | 0.437502831 | 0.791427076 |
|             |             |             | 0.407966614 | 0.687794149 | 0.927932596 | 0.924682677 | 0.440690309 | 0.720194638 |
|             |             |             | 0.361546814 | 0.554792881 | 0.489961892 | 0.239629462 | 0.756849170 | 0.409021914 |
|             |             |             | 0.723976791 | 0.719886422 | 0.523109972 | 0.270215929 | 0.118560977 | 0.409183532 |
|             |             |             | 0.704047680 | 0.648660302 | 0.620436072 | 0.554142892 | 0.074193336 | 0.722076595 |
|             |             |             | 0.710935652 | 0.592897475 | 0.520905852 | 0.224009067 | 0.389436185 | 0.090886936 |
|             |             |             | 0.396524221 | 0.510468841 | 0.666879833 | 0.922942102 | 0.090763748 | 0.716314673 |
|             |             |             | 0.512582064 | 0.505810797 | 0.687725425 | 0.587585628 | 0.408747107 | 0.074272051 |
|             |             |             | 0.514305234 | 0.626975715 | 0.697574079 | 0.666589916 | 0.943951309 | 0.462001844 |
|             |             |             | 0.242057681 | 0.395435274 | 0.239884034 | 0.349584669 | 0.655662835 | 0.797255397 |
|             |             |             | 0.209092617 | 0.337156266 | 0.344608307 | 0.350782335 | 0.295832276 | 0.790219724 |
|             |             |             | 0.212703899 | 0.457459658 | 0.234188650 | 0.016529184 | 0.626893401 | 0.135913789 |
|             |             |             | 0.460078001 | 0.449055851 | 0.204959869 | 0.038254336 | 0.324405670 | 0.470821261 |
|             |             |             | 0.447939366 | 0.561737120 | 0.188583165 | 0.712749124 | 0.648387134 | 0.779860198 |
|             |             |             | 0.560771644 | 0.573205590 | 0.242119640 | 0.026190680 | 0.963024676 | 0.136174619 |
|             |             |             | 0.682817698 | 0.640945733 | 0.552819729 | 0.696322381 | 0.307206631 | 0.471524328 |
|             |             |             | 0.482539535 | 0.553734899 | 0.658003986 | 0.397678465 | 0.988296449 | 0.153753653 |
|             |             |             | 0.251800418 | 0.412055999 | 0.308467394 | 0.781904042 | 0.457045972 | 0.607214451 |
|             |             |             | 0.475066245 | 0.523144662 | 0.234926066 | 0.473532498 | 0.767513037 | 0.942752182 |
|             |             |             | 0.520058930 | 0.580523968 | 0.530161262 | 0.875738263 | 0.728545308 | 0.380970210 |
|             |             |             | 0.406425178 | 0.497765243 | 0.354402453 | 0.135685280 | 0.614329278 | 0.272518605 |
|             |             |             |             |             |             | 0.599762976 | 0.777564704 | 0.087935343 |
|             |             |             |             |             |             | 0.544640958 | 0.917705595 | 0.612945497 |
|             |             |             |             |             |             | 0.156935439 | 0.126467526 | 0.252648771 |
|             |             |             |             |             |             | 0.862595677 | 0.56846815  | 0.267387807 |
|             |             |             |             |             |             | 0.086003885 | 0.217812285 | 0.598841786 |
|             |             |             |             |             |             | 0.708022714 | 0.536647618 | 0.935073853 |
|             |             |             |             |             |             | 0.394487292 | 0.844438970 | 0.727463153 |
|             |             |             |             |             |             | 0.540890992 | 0.211924329 | 0.602255285 |
|             |             |             |             |             |             | 0.233041510 | 0.295899004 | 0.932376087 |
|             |             |             |             |             |             | 0.867235124 | 0.874264061 | 0.265925646 |
|             |             |             |             |             |             | 0.089133002 | 0.478316337 | 0.604724348 |
|             |             |             |             |             |             | 0.701990902 | 0.755410254 | 0.941726685 |
|             |             |             |             |             |             | 0.396896809 | 0.142718136 | 0.262344420 |
|             |             |             |             |             |             | 0.774095833 | 0.919224381 | 0.614764333 |
|             |             |             |             |             |             | 0.228022859 | 0.522328019 | 0.936691880 |
|             |             |             |             |             |             | 0.468951941 | 0.284860194 | 0.931875587 |
|             |             |             |             |             |             | 0.394056380 | 0.618318856 | 0.533951223 |
|             |             |             |             |             |             | 0.326049715 | 0.423331738 | 0.456295192 |
|             |             |             |             |             |             | 0.526694715 | 0.596496642 | 0.414018661 |
|             |             |             |             |             |             | 0.643858552 | 0.896923959 | 0.407618970 |
|             |             |             |             |             |             | 0.291362673 | 0.170377016 | 0.460615128 |
|             |             |             |             |             |             | 0.373167694 | 0.629347146 | 0.594834387 |
|             |             |             |             |             |             | 0.324968457 | 0.484695107 | 0.492117614 |
|             |             |             |             |             |             | 0.718894958 | 0.709125757 | 0.507461786 |
|             |             |             |             |             |             | 0.706972480 | 0.649200618 | 0.608880639 |
|             |             |             |             |             |             | 0.690172195 | 0.576484144 | 0.513151646 |

TS10, Fig. 6, E = -977.351 eV

|     |               |               |               |
|-----|---------------|---------------|---------------|
| 1.0 | 13.6750001907 | 0.0000000000  | 0.0000000000  |
|     | -6.8375000954 | 11.8428975619 | 0.0000000000  |
|     | 0.0000000000  | 0.0000000000  | 14.7670001984 |

Al Si O H N Cu  
4 32 75 16 4 2

Direct

|             |             |             |
|-------------|-------------|-------------|
| 0.247940794 | 0.522321582 | 0.051878858 |
| 0.699627757 | 0.760384202 | 0.824261189 |
| 0.127329543 | 0.093550421 | 0.363179505 |
| 0.807674468 | 0.967034042 | 0.504062831 |
| 0.245192841 | 0.313152075 | 0.824261189 |
| 0.693077087 | 0.532167852 | 0.043707911 |
| 0.35866075  | 0.86249648  | 0.371957123 |
| 0.375838071 | 0.101756699 | 0.364112437 |
| 0.894126952 | 0.624950111 | 0.369191140 |
| 0.470139921 | 0.756589770 | 0.830559254 |
| 0.474689215 | 0.748299778 | 0.049284000 |
| 0.574618220 | 0.968897402 | 0.715392470 |
| 0.242443725 | 0.297840357 | 0.042958841 |
| 0.569955707 | 0.197873071 | 0.085851376 |
| 0.900178611 | 0.861322880 | 0.368065298 |
| 0.037705548 | 0.435553521 | 0.707824886 |
| 0.695871830 | 0.754857838 | 0.046392664 |
| 0.802169442 | 0.975237548 | 0.713526666 |
| 0.038552012 | 0.206876576 | 0.701997399 |
| 0.798692644 | 0.422966719 | 0.710385442 |
| 0.467958693 | 0.308152825 | 0.824066043 |
| 0.906839192 | 0.860728443 | 0.163040668 |
| 0.471789867 | 0.301959783 | 0.004223822 |
| 0.580370486 | 0.199119929 | 0.500768185 |
| 0.137395382 | 0.641909838 | 0.163416877 |
| 0.038666312 | 0.437933147 | 0.501912296 |
| 0.373587191 | 0.093232609 | 0.156965554 |
| 0.243056893 | 0.535036981 | 0.030559611 |
| 0.800936878 | 0.430465430 | 0.503177524 |
| 0.373166547 | 0.207929000 | 0.495745867 |
| 0.696294188 | 0.535846651 | 0.824900866 |
| 0.365859270 | 0.859306157 | 0.165981263 |
| 0.562744021 | 0.961331367 | 0.506782830 |
| 0.901176214 | 0.623769999 | 0.164114609 |
| 0.129825771 | 0.641450346 | 0.377067357 |
| 0.144167125 | 0.081364989 | 0.150015190 |
| 0.700856984 | 0.291703612 | 0.725919545 |
| 0.124801442 | 0.537472963 | 0.434051335 |
| 0.389261633 | 0.619945753 | 0.080392785 |
| 0.029839857 | 0.956039250 | 0.389521629 |
| 0.70591497  | 0.012180943 | 0.735856295 |
| 0.368915528 | 0.320843637 | 0.072914915 |
| 0.021248128 | 0.655741215 | 0.398270756 |
| 0.011076458 | 0.307540625 | 0.721953630 |
| 0.667817056 | 0.862669143 | 0.083857701 |
| 0.332973123 | 0.969191432 | 0.371370292 |
| 0.909456313 | 0.104788266 | 0.486714274 |
| 0.232306346 | 0.775579393 | 0.147040023 |
| 0.911608398 | 0.418533891 | 0.490830123 |
| 0.563656092 | 0.730353177 | 0.788252592 |
| 0.244543165 | 0.051652167 | 0.129256219 |
| 0.921449184 | 0.750351151 | 0.625259355 |
| 0.568502724 | 0.433977574 | 0.795918167 |
| 0.803167939 | 0.890482426 | 0.786758363 |
| 0.787445128 | 0.504484832 | 0.783036053 |
| 0.804837584 | 0.543402433 | 0.092155829 |
| 0.445181280 | 0.837526679 | 0.098813675 |
| 0.123182118 | 0.199085996 | 0.424439490 |



|                                                                                   |               |               |              |               |               |              |              |              |
|-----------------------------------------------------------------------------------|---------------|---------------|--------------|---------------|---------------|--------------|--------------|--------------|
| 0.535413027                                                                       | 0.598166049   | 0.546182096   | 0.873104095  | 0.726596177   | 0.387731016   | 0.910042644  | 0.113719530  | 0.481043905  |
| 0.375864893                                                                       | 0.498028964   | 0.329925716   | 0.132101938  | 0.613936901   | 0.236679626   | 0.236674041  | 0.771212161  | 0.142607525  |
| <b>2[Cu(OH)<sub>2</sub>]<sup>+</sup>, Fig. 6, E = -992.643 eV</b>                 |               |               | 0.59111839   | 0.770193577   | 0.084174260   | 0.914182425  | 0.423238963  | 0.493632734  |
| 1.0                                                                               | 13.6750001907 | 0.0000000000  | 0.533690214  | 0.912427306   | 0.608446300   | 0.560142696  | 0.726323426  | 0.790599346  |
|                                                                                   | -6.8375000954 | 0.0000000000  | 0.154124737  | 0.134315968   | 0.255362064   | 0.241574153  | 0.054487005  | 0.131350949  |
|                                                                                   | 0.0000000000  | 0.0000000000  | 0.861708045  | 0.573403299   | 0.266852707   | 0.921193361  | 0.753517687  | 0.158406213  |
| Al Si O H N Cu                                                                    | 11.8428975619 | 0.0000000000  | 0.083075583  | 0.228817212   | 0.598546863   | 0.574864209  | 0.437455714  | 0.803945959  |
| 4 32 76 18 4 2                                                                    | 0.0000000000  | 14.7670001984 | 0.712026060  | 0.536746085   | 0.935461819   | 0.795882761  | 0.888282835  | 0.784140229  |
| Direct                                                                            | 0.391047180   | 0.847448826   | 0.391047180  | 0.847448826   | 0.272534162   | 0.791762888  | 0.506252170  | 0.784100354  |
|                                                                                   | 0.542158544   | 0.214837193   | 0.542158544  | 0.214837193   | 0.601263583   | 0.801917672  | 0.539588332  | 0.100081153  |
|                                                                                   | 0.233081520   | 0.292278707   | 0.233081520  | 0.292278707   | 0.928233266   | 0.453940094  | 0.847643316  | 0.100010596  |
|                                                                                   | 0.868278921   | 0.876025856   | 0.868278921  | 0.876025856   | 0.274864197   | 0.128829315  | 0.203894675  | 0.428420097  |
|                                                                                   | 0.087193273   | 0.462290436   | 0.087193273  | 0.462290436   | 0.600402057   | 0.489132524  | 0.875524514  | 0.780368447  |
|                                                                                   | 0.717347085   | 0.767038584   | 0.717347085  | 0.767038584   | 0.945930481   | 0.149707302  | 0.175884292  | 0.076252840  |
|                                                                                   | 0.397315919   | 0.143725350   | 0.397315919  | 0.143725350   | 0.262200624   | 0.805912614  | 0.531408727  | 0.438264132  |
|                                                                                   | 0.788904607   | 0.920493841   | 0.788904607  | 0.920493841   | 0.6111446023  | 0.595530629  | 0.093644738  | 0.489249259  |
|                                                                                   | 0.213906184   | 0.521471381   | 0.213906184  | 0.521471381   | 0.929853266   | 0.139041469  | 0.222359106  | 0.768490314  |
|                                                                                   | 0.467979759   | 0.285918742   | 0.467979759  | 0.285918742   | 0.931023002   | 0.457287550  | 0.877800941  | 0.442220688  |
|                                                                                   | 0.439794898   | 0.635830700   | 0.439794898  | 0.635830700   | 0.528998017   | 0.484590590  | 0.217978209  | 0.768384159  |
|                                                                                   | 0.293019176   | 0.461995721   | 0.293019176  | 0.461995721   | 0.426527709   | 0.812007666  | 0.875126362  | 0.433717787  |
|                                                                                   | 0.613402486   | 0.638770938   | 0.613402486  | 0.638770938   | 0.446486086   | 0.131381512  | 0.526417375  | 0.773551285  |
|                                                                                   | 0.456732810   | 0.646335006   | 0.456732810  | 0.646335006   | 0.343591541   | 0.810833216  | 0.852047622  | 0.091706134  |
|                                                                                   | 0.823738158   | 0.873363495   | 0.823738158  | 0.873363495   | 0.607087135   | 0.483549953  | 0.193547505  | 0.427994430  |
|                                                                                   | 0.294546396   | 0.176473618   | 0.294546396  | 0.176473618   | 0.458156437   | 0.151599616  | 0.546082914  | 0.118874311  |
|                                                                                   | 0.421382874   | 0.668512106   | 0.421382874  | 0.668512106   | 0.580509901   | 0.459125400  | 0.191101283  | 0.089480892  |
|                                                                                   | 0.339725018   | 0.524843872   | 0.339725018  | 0.524843872   | 0.468726814   | 0.271198392  | 0.444263309  | 0.792041659  |
|                                                                                   | 0.749950111   | 0.674492598   | 0.749950111  | 0.674492598   | 0.538710356   | 0.922573984  | 0.440248311  | 0.715762198  |
|                                                                                   | 0.725051224   | 0.648425758   | 0.725051224  | 0.648425758   | 0.653912246   | 0.242809370  | 0.764115453  | 0.409453362  |
|                                                                                   | 0.697754920   | 0.545921504   | 0.697754920  | 0.545921504   | 0.579869330   | 0.269801527  | 0.118901089  | 0.707088224  |
|                                                                                   | 0.405873626   | 0.515832126   | 0.405873626  | 0.515832126   | 0.673791409   | 0.550499380  | 0.076037847  | 0.721002221  |
|                                                                                   | 0.516697109   | 0.505816460   | 0.516697109  | 0.505816460   | 0.705900550   | 0.225938216  | 0.395928413  | 0.086688302  |
|                                                                                   | 0.517403066   | 0.626168609   | 0.517403066  | 0.626168609   | 0.722570002   | 0.927415729  | 0.091449142  | 0.721144497  |
|                                                                                   | 0.197799727   | 0.382037550   | 0.197799727  | 0.382037550   | 0.587711632   | 0.587711632  | 0.409008384  | 0.069791637  |
|                                                                                   | 0.207978934   | 0.295418739   | 0.207978934  | 0.295418739   | 0.278870642   | 0.670314670  | 0.952694416  | 0.457580864  |
|                                                                                   | 0.153905168   | 0.373027503   | 0.153905168  | 0.373027503   | 0.315117121   | 0.343298376  | 0.662542343  | 0.803263247  |
|                                                                                   | 0.424631119   | 0.449664742   | 0.424631119  | 0.449664742   | 0.174849913   | 0.355812490  | 0.307480603  | 0.788632810  |
|                                                                                   | 0.417845875   | 0.565896749   | 0.417845875  | 0.565896749   | 0.155717209   | 0.018200062  | 0.633097708  | 0.131530628  |
|                                                                                   | 0.519839883   | 0.572190762   | 0.519839883  | 0.572190762   | 0.221608102   | 0.043762293  | 0.332363844  | 0.462309599  |
|                                                                                   | 0.559994280   | 0.648567915   | 0.559994280  | 0.648567915   | 0.405975491   | 0.722653687  | 0.653642118  | 0.784487784  |
|                                                                                   | 0.435265332   | 0.665956914   | 0.435265332  | 0.665956914   | 0.401664446   | 0.023720855  | 0.971407592  | 0.135155484  |
|                                                                                   | 0.698242009   | 0.620711565   | 0.698242009  | 0.620711565   | 0.588353693   | 0.696907520  | 0.313515029  | 0.471109003  |
|                                                                                   | 0.492289662   | 0.558752298   | 0.492289662  | 0.558752298   | 0.677008808   | 0.392844707  | 0.989450216  | 0.154948071  |
|                                                                                   | 0.213313714   | 0.373022616   | 0.213313714  | 0.373022616   | 0.272713035   | 0.782416403  | 0.462843657  | 0.606376231  |
|                                                                                   | 0.436532825   | 0.522538960   | 0.436532825  | 0.522538960   | 0.204740316   | 0.480134398  | 0.781330466  | 0.939017117  |
|                                                                                   | 0.556981087   | 0.612488925   | 0.556981087  | 0.612488925   | 0.559550941   | 0.880556226  | 0.738620102  | 0.384030819  |
|                                                                                   | 0.351381719   | 0.501724958   | 0.351381719  | 0.501724958   | 0.314671874   | 0.131903753  | 0.623207927  | 0.274047256  |
| <b>[Cu(OH)<sub>2</sub>]<sup>+</sup> + Cu<sup>+</sup>, Fig. 6, E = -972.797 eV</b> |               |               | 1.0          | 13.6750001907 | 0.0000000000  | 0.0000000000 | 0.0000000000 | 0.0000000000 |
|                                                                                   | -6.8375000954 | 0.0000000000  | 0.0000000000 | 0.0000000000  | 14.7670001984 | 0.081327036  | 0.225052729  | 0.598057151  |
| Al Si O H N Cu                                                                    | 11.8428975619 | 0.0000000000  | 0.0000000000 | 0.0000000000  | 14.7670001984 | 0.719508111  | 0.542908490  | 0.938165843  |
| 4 32 76 16 4 2                                                                    | 0.0000000000  | 0.0000000000  | 0.0000000000 | 0.0000000000  | 14.7670001984 | 0.393255234  | 0.844449461  | 0.271806508  |
| Direct                                                                            | 0.398598194   | 0.398598194   | 0.398598194  | 0.398598194   | 0.398598194   | 0.538380504  | 0.212020203  | 0.599725187  |
|                                                                                   | 0.732842922   | 0.732842922   | 0.732842922  | 0.732842922   | 0.732842922   | 0.233153671  | 0.300550520  | 0.929734826  |
|                                                                                   | 0.082759298   | 0.082759298   | 0.082759298  | 0.082759298   | 0.082759298   | 0.867356956  | 0.876837790  | 0.263775229  |
|                                                                                   | 0.379710853   | 0.379710853   | 0.379710853  | 0.379710853   | 0.379710853   | 0.087191418  | 0.470993668  | 0.602942765  |
|                                                                                   | 0.495493025   | 0.495493025   | 0.495493025  | 0.495493025   | 0.495493025   | 0.699293852  | 0.755733967  | 0.941295028  |
|                                                                                   | 0.143200964   | 0.143200964   | 0.143200964  | 0.143200964   | 0.143200964   | 0.395248741  | 0.147997797  | 0.260779828  |
|                                                                                   | 0.493800104   | 0.493800104   | 0.493800104  | 0.493800104   | 0.493800104   | 0.782972515  | 0.931760252  | 0.610952735  |
|                                                                                   | 0.797746062   | 0.797746062   | 0.797746062  | 0.797746062   | 0.797746062   | 0.210873991  | 0.521839917  | 0.935337365  |
|                                                                                   | 0.136109173   | 0.136109173   | 0.136109173  | 0.136109173   | 0.136109173   | 0.463094682  | 0.280783445  | 0.930303216  |
|                                                                                   | 0.165189773   | 0.165189773   | 0.165189773  | 0.165189773   | 0.165189773   | 0.329831094  | 0.462018639  | 0.439727753  |
|                                                                                   | 0.797656357   | 0.797656357   | 0.797656357  | 0.797656357   | 0.797656357   | 0.523901522  | 0.582315087  | 0.365479916  |
|                                                                                   | 0.783047020   | 0.783047020   | 0.783047020  | 0.783047020   | 0.783047020   | 0.648451149  | 0.899805903  | 0.406822413  |
|                                                                                   | 0.780120790   | 0.780120790   | 0.780120790  | 0.780120790   | 0.780120790   | 0.287557423  | 0.158433393  | 0.439878608  |
|                                                                                   | 0.093216635   | 0.093216635   | 0.093216635  | 0.093216635   | 0.093216635   | 0.262836248  | 0.386422724  | 0.439806730  |
|                                                                                   | 0.101332076   | 0.101332076   | 0.101332076  | 0.101332076   | 0.101332076   | 0.222971603  | 0.399156868  | 0.206913829  |
|                                                                                   | 0.200988576   | 0.200988576   | 0.200988576  | 0.200988576   | 0.200988576   | 0.188514560  | 0.327601165  | 0.305438845  |
|                                                                                   | 0.86522394    | 0.86522394    | 0.86522394   | 0.86522394    | 0.86522394    | 0.186799780  | 0.447617263  | 0.298517526  |
|                                                                                   | 0.436116219   | 0.436116219   | 0.436116219  | 0.436116219   | 0.436116219   | 0.430269510  | 0.453137189  | 0.170149997  |
|                                                                                   | 0.753466725   | 0.753466725   | 0.753466725  | 0.753466725   | 0.753466725   | 0.425102651  | 0.571422637  | 0.162463829  |
|                                                                                   | 0.979520917   | 0.979520917   | 0.979520917  | 0.979520917   | 0.979520917   | 0.534839749  | 0.571855307  | 0.214516506  |
|                                                                                   | 0.210472718   | 0.210472718   | 0.210472718  | 0.210472718   | 0.210472718   | 0.515252292  | 0.570587635  | 0.431309909  |
|                                                                                   | 0.425786167   | 0.425786167   | 0.425786167  | 0.425786167   | 0.425786167   | 0.746622205  | 0.774453461  | 0.593560457  |
|                                                                                   | 0.823724747   | 0.823724747   | 0.823724747  | 0.823724747   | 0.823724747   | 0.727832913  | 0.663759828  | 0.653147519  |
|                                                                                   | 0.162502810   | 0.162502810   | 0.162502810  | 0.162502810   | 0.162502810   | 0.726970136  | 0.659604549  | 0.539334416  |
|                                                                                   | 0.038192544   | 0.038192544   | 0.038192544  | 0.038192544   | 0.038192544   | 0.353109032  | 0.540533125  | 0.548224211  |
|                                                                                   | 0.498877227   | 0.498877227   | 0.498877227  | 0.498877227   | 0.498877227   | 0.353639305  | 0.522973597  | 0.660620928  |
|                                                                                   | 0.164264828   | 0.164264828   | 0.164264828  | 0.164264828   | 0.164264828   | 0.368496567  | 0.641304970  | 0.621064305  |
|                                                                                   | 0.499752820   | 0.499752820   | 0.499752820  | 0.499752820   | 0.499752820   | 0.228825673  | 0.407085449  | 0.277422607  |
|                                                                                   | 0.157245263   | 0.157245263   | 0.157245263  | 0.157245263   | 0.157245263   | 0.449212104  | 0.525824130  | 0.204878137  |
|                                                                                   | 0.830622852   | 0.830622852   | 0.830622852  | 0.830622852   | 0.830622852   | 0.703045905  | 0.687277257  | 0.594839394  |
|                                                                                   | 0.503210485   | 0.503210485   | 0.503210485  | 0.503210485   | 0.503210485   | 0.389622450  | 0.580477059  | 0.608885229  |
|                                                                                   | 0.493171841   | 0.493171841   | 0.493171841  | 0.493171841   | 0.493171841   | 0.381660491  | 0.493181318  | 0.323049456  |
|                                                                                   | 0.828875542   | 0.828875542   | 0.828875542  | 0.828875542   | 0.828875542   | 0.547368169  | 0.637443364  | 0.605264366  |
| <b>TS12, Fig. 6, E = -972.452 eV</b>                                              |               |               | 1.0          | 13.6750001907 | 0.0000000000  | 0.0000000000 | 0.0000000000 | 0.0000000000 |
|                                                                                   | -6.8375000954 | 0.0000000000  | 0.0000000000 | 0.0000000000  | 14.7670001984 | 0.081327036  | 0.225052729  | 0.598057151  |
| Al Si O H N Cu                                                                    | 11.8428975619 | 0.0000000000  | 0.0000000000 | 0.0000000000  | 14.7670001984 | 0.719508111  | 0.542908490  | 0.938165843  |
| 4 32 76 16 4 2                                                                    | 0.0000000000  | 0.0000000000  | 0.0000000000 | 0.0000000000  | 14.7670001984 | 0.393255234  | 0.844449461  | 0.271806508  |
| Direct                                                                            | 0.398598194   | 0.398598194   | 0.398598194  | 0.398598194   | 0.398598194   | 0.538380504  | 0.2120202    |              |

|             |             |             |                                                                                |             |             |             |             |             |
|-------------|-------------|-------------|--------------------------------------------------------------------------------|-------------|-------------|-------------|-------------|-------------|
| 0.358560562 | 0.865055919 | 0.373456508 | 0.458891213                                                                    | 0.277640492 | 0.929901898 | 0.810689807 | 0.851634324 | 0.088861071 |
| 0.379322082 | 0.108195074 | 0.364609092 | 0.387733608                                                                    | 0.507392287 | 0.441675454 | 0.482200265 | 0.194001868 | 0.427000880 |
| 0.893035531 | 0.628539026 | 0.370400488 | 0.559619665                                                                    | 0.608309269 | 0.340273261 | 0.149555549 | 0.544834852 | 0.118141674 |
| 0.469782948 | 0.760101616 | 0.831448317 | 0.650587380                                                                    | 0.903808117 | 0.404831588 | 0.460391909 | 0.191896424 | 0.089969955 |
| 0.474744251 | 0.754997194 | 0.046886344 | 0.285496026                                                                    | 0.157704920 | 0.465473890 | 0.267499655 | 0.441300273 | 0.792931318 |
| 0.575412810 | 0.972292066 | 0.713326156 | 0.309677988                                                                    | 0.449516296 | 0.454369634 | 0.920336187 | 0.437687248 | 0.717045069 |
| 0.242296323 | 0.299284488 | 0.041800514 | 0.234404847                                                                    | 0.404537141 | 0.221143961 | 0.240848303 | 0.763752520 | 0.409625292 |
| 0.568931043 | 0.199946240 | 0.704646885 | 0.211724311                                                                    | 0.343033344 | 0.323095143 | 0.268405974 | 0.117213033 | 0.407716423 |
| 0.899681747 | 0.862997115 | 0.367083758 | 0.207692012                                                                    | 0.461009324 | 0.311170250 | 0.550005078 | 0.075659268 | 0.719794035 |
| 0.036028631 | 0.434938818 | 0.706126988 | 0.427309632                                                                    | 0.447699219 | 0.163404882 | 0.225429833 | 0.395485252 | 0.089040726 |
| 0.693273187 | 0.752501547 | 0.046089400 | 0.427648276                                                                    | 0.568885744 | 0.153685674 | 0.924190104 | 0.089308642 | 0.715010107 |
| 0.801813841 | 0.977087975 | 0.713372350 | 0.541864693                                                                    | 0.568263352 | 0.194125310 | 0.586888373 | 0.409469306 | 0.065211147 |
| 0.037511602 | 0.208906093 | 0.704331338 | 0.563491106                                                                    | 0.610531449 | 0.406499624 | 0.669886827 | 0.954102278 | 0.458024651 |
| 0.797988653 | 0.424692750 | 0.707145154 | 0.718498170                                                                    | 0.758786082 | 0.582770348 | 0.341465652 | 0.661113143 | 0.804512501 |
| 0.467644155 | 0.310478359 | 0.823479116 | 0.700913489                                                                    | 0.648143232 | 0.639648855 | 0.351956457 | 0.305546343 | 0.787803352 |
| 0.904361904 | 0.861644030 | 0.160993680 | 0.713922858                                                                    | 0.651581407 | 0.527048111 | 0.017760549 | 0.632919431 | 0.130529374 |
| 0.469605535 | 0.300483555 | 0.037607383 | 0.306826204                                                                    | 0.502988219 | 0.597889602 | 0.050329678 | 0.333306581 | 0.465713531 |
| 0.578088284 | 0.202560246 | 0.498410881 | 0.369854867                                                                    | 0.554836988 | 0.695072234 | 0.712289333 | 0.648923755 | 0.778818071 |
| 0.134896591 | 0.641750693 | 0.164859489 | 0.356954902                                                                    | 0.637018621 | 0.620540142 | 0.023898561 | 0.968829811 | 0.132496923 |
| 0.040911056 | 0.440774858 | 0.499300480 | 0.249091014                                                                    | 0.419712663 | 0.290241480 | 0.695662260 | 0.310426176 | 0.469488263 |
| 0.370592088 | 0.093786158 | 0.156985238 | 0.455256909                                                                    | 0.524726290 | 0.194141656 | 0.392778873 | 0.989188612 | 0.154529274 |
| 0.235328600 | 0.538202405 | 0.834796071 | 0.678737462                                                                    | 0.671641648 | 0.579910278 | 0.783529162 | 0.460622847 | 0.603846014 |
| 0.801578820 | 0.431014240 | 0.501049519 | 0.373179793                                                                    | 0.571950555 | 0.627075791 | 0.481128335 | 0.782280564 | 0.938912928 |
| 0.039138678 | 0.213095337 | 0.495779932 | 0.409951299                                                                    | 0.512837291 | 0.318401098 | 0.869340718 | 0.731916368 | 0.382812470 |
| 0.700492501 | 0.538335562 | 0.825747311 | 0.519164145                                                                    | 0.611268520 | 0.584054589 | 0.131933585 | 0.624830425 | 0.273041666 |
| 0.366717666 | 0.860475540 | 0.165829152 | [Cu <sub>2</sub> (μ-OH) <sub>2</sub> ] <sup>2+</sup> , Fig. 6, E = -973.560 eV |             |             |             |             |             |
| 0.561462402 | 0.962609291 | 0.503622174 | 1.0                                                                            |             |             |             |             |             |
| 0.902577639 | 0.626475632 | 0.162886456 | 13.6750001907 0.0000000000 0.0000000000                                        |             |             |             |             |             |
| 0.127601460 | 0.650098264 | 0.380293220 | -6.8375000954 11.8428975619 0.0000000000                                       |             |             |             |             |             |
| 0.140970290 | 0.082926035 | 0.150462255 | 0.0000000000 0.0000000000 14.7670001984                                        |             |             |             |             |             |
| 0.700084150 | 0.293628871 | 0.723830521 | Al Si O H N Cu                                                                 |             |             |             |             |             |
| 0.125742033 | 0.546350181 | 0.435673058 | 4 32 74 16 4 2                                                                 |             |             |             |             |             |
| 0.377926677 | 0.627461433 | 0.070233889 | Direct                                                                         |             |             |             |             |             |
| 0.031661410 | 0.953336120 | 0.386873394 | 0.238553032 0.522742927 0.049760744                                            |             |             |             |             |             |
| 0.707414031 | 0.017330268 | 0.732923627 | 0.693486333 0.757002354 0.823235691                                            |             |             |             |             |             |
| 0.368760407 | 0.322505653 | 0.072358109 | 0.126417771 0.091466025 0.363068461                                            |             |             |             |             |             |
| 0.020463403 | 0.665142953 | 0.404812753 | 0.809719682 0.975203693 0.502296925                                            |             |             |             |             |             |
| 0.007164765 | 0.307172388 | 0.727177441 | 0.245079756 0.316668123 0.823361754                                            |             |             |             |             |             |
| 0.670088351 | 0.627938926 | 0.083274998 | 0.695257366 0.532065690 0.041957341                                            |             |             |             |             |             |
| 0.350159764 | 0.979891598 | 0.377577364 | 0.358538866 0.864646733 0.371982604                                            |             |             |             |             |             |
| 0.908774853 | 0.116181411 | 0.487242907 | 0.378759056 0.107746445 0.363992423                                            |             |             |             |             |             |
| 0.236317575 | 0.770685613 | 0.141637996 | 0.892626464 0.628282607 0.369726151                                            |             |             |             |             |             |
| 0.913114965 | 0.418812007 | 0.490654409 | 0.468896180 0.759886920 0.830339670                                            |             |             |             |             |             |
| 0.556458175 | 0.724717855 | 0.791162848 | 0.474453479 0.754597306 0.046663441                                            |             |             |             |             |             |
| 0.241652071 | 0.053522840 | 0.130294859 | 0.574735284 0.972057462 0.712815762                                            |             |             |             |             |             |
| 0.919521630 | 0.751618922 | 0.157310143 | 0.241316929 0.299376190 0.041369446                                            |             |             |             |             |             |
| 0.572879434 | 0.434664529 | 0.803682923 | 0.568635285 0.200095192 0.704236567                                            |             |             |             |             |             |
| 0.794458032 | 0.887344658 | 0.784911931 | 0.989824947 0.862641275 0.365581632                                            |             |             |             |             |             |
| 0.790150225 | 0.506925523 | 0.780562341 | 0.036170851 0.435528010 0.705316901                                            |             |             |             |             |             |
| 0.803100348 | 0.539072216 | 0.096138783 | 0.693187714 0.752963722 0.045390464                                            |             |             |             |             |             |
| 0.454048067 | 0.847055495 | 0.101859458 | 0.800665796 0.975977182 0.711951911                                            |             |             |             |             |             |
| 0.124399498 | 0.195557803 | 0.430246741 | 0.036926776 0.208532602 0.703294814                                            |             |             |             |             |             |
| 0.487483501 | 0.874557674 | 0.780023813 | 0.797752321 0.424610049 0.707303851                                            |             |             |             |             |             |
| 0.149256617 | 0.174877599 | 0.076863989 | 0.465674043 0.308721542 0.823446810                                            |             |             |             |             |             |
| 0.803894699 | 0.527234674 | 0.435935915 | 0.904662013 0.861596525 0.159591585                                            |             |             |             |             |             |
| 0.592456758 | 0.091676183 | 0.488565564 | 0.468281984 0.300332248 0.037547678                                            |             |             |             |             |             |
| 0.136301979 | 0.221141309 | 0.772668600 | 0.577614188 0.203011811 0.498205215                                            |             |             |             |             |             |
| 0.456169993 | 0.875533104 | 0.442600459 | 0.134874865 0.641567349 0.163033530                                            |             |             |             |             |             |
| 0.481703043 | 0.215854824 | 0.767845571 | 0.040698145 0.440839827 0.499103457                                            |             |             |             |             |             |
| 0.814275563 | 0.878800035 | 0.432043731 | 0.370447129 0.093895279 0.156264305                                            |             |             |             |             |             |
| 0.130365223 | 0.525479138 | 0.773360074 | 0.237104461 0.537256837 0.831591249                                            |             |             |             |             |             |
| 0.809936881 | 0.851267457 | 0.090495877 | 0.801457405 0.430869937 0.428508959                                            |             |             |             |             |             |
| 0.482389510 | 0.194351122 | 0.427847266 | 0.038663346 0.212120086 0.496432841                                            |             |             |             |             |             |
| 0.150354981 | 0.544290841 | 0.121999212 | 0.698381126 0.537264228 0.825254083                                            |             |             |             |             |             |
| 0.459703982 | 0.191248089 | 0.089867912 | 0.367107660 0.860617399 0.164722458                                            |             |             |             |             |             |
| 0.269223124 | 0.444223255 | 0.797187269 | 0.560270190 0.962537289 0.503624022                                            |             |             |             |             |             |
| 0.920596778 | 0.437705040 | 0.716559768 | 0.902093470 0.626169443 0.161902800                                            |             |             |             |             |             |
| 0.240961626 | 0.764413178 | 0.411455929 | 0.127355695 0.649433315 0.378508091                                            |             |             |             |             |             |
| 0.268884301 | 0.117982790 | 0.407567680 | 0.141494751 0.083332695 0.149629042                                            |             |             |             |             |             |
| 0.550022960 | 0.075568385 | 0.720716715 | 0.699778080 0.293458670 0.723736882                                            |             |             |             |             |             |
| 0.227448583 | 0.396020293 | 0.090143643 | 0.124335296 0.545375824 0.434083819                                            |             |             |             |             |             |
| 0.926308453 | 0.089349791 | 0.719137669 | 0.378792226 0.627911329 0.071666218                                            |             |             |             |             |             |
| 0.588114202 | 0.409058183 | 0.065802075 | 0.030920139 0.951436222 0.384732425                                            |             |             |             |             |             |
| 0.670319319 | 0.952889025 | 0.457985401 | 0.706482708 0.016095426 0.732334793                                            |             |             |             |             |             |
| 0.340629816 | 0.661619902 | 0.808534920 | 0.367436290 0.321967363 0.071997657                                            |             |             |             |             |             |
| 0.353977233 | 0.307923526 | 0.788918138 | 0.020395849 0.665362060 0.402975291                                            |             |             |             |             |             |
| 0.018186308 | 0.632840991 | 0.131155550 | 0.007198532 0.307372451 0.724963546                                            |             |             |             |             |             |
| 0.050938215 | 0.334057510 | 0.464291006 | 0.670224667 0.628568649 0.083096452                                            |             |             |             |             |             |
| 0.716519237 | 0.650871456 | 0.779417336 | 0.349931896 0.979387820 0.376194000                                            |             |             |             |             |             |
| 0.023299729 | 0.969049990 | 0.132416621 | 0.907848716 0.115283616 0.489763081                                            |             |             |             |             |             |
| 0.695865631 | 0.310438544 | 0.470003784 | 0.236677036 0.770687521 0.140785962                                            |             |             |             |             |             |
| 0.392926961 | 0.989146888 | 0.154775515 | 0.912784696 0.418631703 0.490406841                                            |             |             |             |             |             |
| 0.783537745 | 0.460928768 | 0.604125679 | 0.557070434 0.726263583 0.788321137                                            |             |             |             |             |             |
| 0.481211662 | 0.785165012 | 0.939934969 | 0.241989806 0.054047357 0.128003150                                            |             |             |             |             |             |
| 0.873097777 | 0.733676910 | 0.383681178 | 0.919221342 0.751330522 0.156209216                                            |             |             |             |             |             |
| 0.132268876 | 0.625840783 | 0.274833053 | 0.570659041 0.433344722 0.803768754                                            |             |             |             |             |             |
| 0.592592359 | 0.770682812 | 0.086351402 | 0.794978857 0.887697756 0.784398735                                            |             |             |             |             |             |
| 0.545777254 | 0.924457848 | 0.607437670 | 0.788394988 0.506428719 0.860887709                                            |             |             |             |             |             |
| 0.153857678 | 0.131669357 | 0.252029419 | 0.802361548 0.538806856 0.095354632                                            |             |             |             |             |             |
| 0.872091293 | 0.580804110 | 0.267359793 | 0.454621315 0.848157525 0.100083046                                            |             |             |             |             |             |
| 0.085468777 | 0.225355130 | 0.600400448 | 0.120966919 0.192421824 0.429479837                                            |             |             |             |             |             |
| 0.720487118 | 0.545012534 | 0.934888422 | 0.487282187 0.875132859 0.780324876                                            |             |             |             |             |             |
| 0.390636235 | 0.843952417 | 0.272807956 | 0.147783861 0.174764529 0.076050619                                            |             |             |             |             |             |
| 0.536807954 | 0.201910439 | 0.599323511 | 0.803822637 0.527047813 0.435376078                                            |             |             |             |             |             |
| 0.234224409 | 0.300874054 | 0.932524920 | 0.591230929 0.091638885 0.489626378                                            |             |             |             |             |             |
| 0.868306577 | 0.876299918 | 0.262652546 | 0.133054286 0.218224898 0.773537099                                            |             |             |             |             |             |
| 0.085577615 | 0.471222609 | 0.602967322 | 0.456163645 0.875796735 0.441479117                                            |             |             |             |             |             |
| 0.697305620 | 0.736808916 | 0.939761639 | 0.480981350 0.214871213 0.767775953                                            |             |             |             |             |             |
| 0.394459873 | 0.155297721 | 0.200605190 | 0.132984705 0.879611552 0.429148108                                            |             |             |             |             |             |
| 0.779478848 | 0.926397204 | 0.610932469 | 0.130191043 0.525047719 0.773196697                                            |             |             |             |             |             |
| 0.202359080 | 0.519053340 | 0.938566744 | 0.240786672 0.524107337 0.050711207                                            |             |             |             |             |             |
|             |             |             | 0.696022868 0.759671271 0.823155344                                            |             |             |             |             |             |
|             |             |             | 0.124160975 0.092104934 0.361970991                                            |             |             |             |             |             |
|             |             |             | 0.810377061 0.980526924 0.501008689                                            |             |             |             |             |             |
|             |             |             | 0.246792763 0.318814933 0.822194934                                            |             |             |             |             |             |
|             |             |             | 0.696327984 0.534790560 0.041278243                                            |             |             |             |             |             |
|             |             |             | 0.355570853 0.873216331 0.376683235                                            |             |             |             |             |             |
|             |             |             | 0.378311336 0.111458227 0.367232223                                            |             |             |             |             |             |
|             |             |             | 0.890619695 0.629626691 0.370021254                                            |             |             |             |             |             |
|             |             |             | 0.470546672 0.763417006 0.833897531                                            |             |             |             |             |             |
|             |             |             | 0.475226641 0.754848659 0.048716236                                            |             |             |             |             |             |
|             |             |             | 0.575849473 0.973355770 0.713909268                                            |             |             |             |             |             |
|             |             |             | 0.240069300 0.299766839 0.039571211                                            |             |             |             |             |             |
|             |             |             | 0.569967985 0.200572401 0.704356432                                            |             |             |             |             |             |
|             |             |             | 0.900125504 0.864448249 0.365483234                                            |             |             |             |             |             |
|             |             |             | 0.038231693 0.438397229 0.706214368                                            |             |             |             |             |             |
|             |             |             | 0.695093393 0.755923033 0.054340999                                            |             |             |             |             |             |
|             |             |             | 0.802133560 0.978974342 0.712461293                                            |             |             |             |             |             |
|             |             |             | 0.037646450 0.211077094 0.702814579                                            |             |             |             |             |             |
|             |             |             | 0.799164712 0.425916070 0.707514048                                            |             |             |             |             |             |
|             |             |             | 0.467353940 0.310491115 0.822794340                                            |             |             |             |             |             |
|             |             |             | 0.905791283 0.863122642 0.159351900                                            |             |             |             |             |             |
|             |             |             | 0.469316691 0.303355277 0.036642127                                            |             |             |             |             |             |
|             |             |             | 0.577824831 0.204006687 0.496524483                                            |             |             |             |             |             |
|             |             |             | 0.135302991 0.645016849 0.163946554                                            |             |             |             |             |             |
|             |             |             | 0.042743333 0.444213599 0.499534875                                            |             |             |             |             |             |
|             |             |             | 0.371399730 0.096263140 0.153279528                                            |             |             |             |             |             |

|             |             |             |                                |             |             |                                                   |             |              |
|-------------|-------------|-------------|--------------------------------|-------------|-------------|---------------------------------------------------|-------------|--------------|
| 0.237768650 | 0.538803816 | 0.834144890 | 0.506112754                    | 0.391479015 | 0.494392604 | 0.351339221                                       | 0.664903224 | 0.809330285  |
| 0.802551985 | 0.431583464 | 0.500822544 | 0.399327010                    | 0.684383810 | 0.376796842 | 0.357851446                                       | 0.312216610 | 0.790143728  |
| 0.037268791 | 0.215139836 | 0.495026529 | 0.450859040                    | 0.724775374 | 0.273653269 | 0.019342378                                       | 0.632323206 | 0.131608084  |
| 0.699898779 | 0.539138675 | 0.824829280 | 0.314389348                    | 0.644870698 | 0.288304538 | 0.054251350                                       | 0.338050395 | 0.462435275  |
| 0.364419222 | 0.866675615 | 0.163269714 | 0.235832050                    | 0.398910642 | 0.293354601 | 0.723980665                                       | 0.658399761 | 0.785832107  |
| 0.560329139 | 0.964173079 | 0.502115190 | 0.463566959                    | 0.509625196 | 0.207462236 | 0.030300815                                       | 0.973353538 | 0.134117588  |
| 0.901738048 | 0.627322555 | 0.161805734 | 0.665682316                    | 0.682089269 | 0.571004391 | 0.697078586                                       | 0.320275038 | 0.473996043  |
| 0.126098484 | 0.652647376 | 0.379241556 | 0.429191411                    | 0.588640571 | 0.638711572 | 0.396283954                                       | 0.995561302 | 0.1525271499 |
| 0.139934570 | 0.086247295 | 0.148460120 | 0.511471570                    | 0.416851908 | 0.560190678 | 0.793395698                                       | 0.469883680 | 0.608130395  |
| 0.700813472 | 0.294692695 | 0.723864496 | 0.391076684                    | 0.659172952 | 0.310817450 | 0.491244227                                       | 0.795322239 | 0.941069961  |
| 0.124695018 | 0.549988925 | 0.435129672 | 0.399521679                    | 0.498830497 | 0.330770016 | 0.875145078                                       | 0.737544954 | 0.386541575  |
| 0.382524192 | 0.625779867 | 0.068242304 | 0.506369352                    | 0.578204334 | 0.526814044 | 0.135535583                                       | 0.630853236 | 0.274952024  |
| 0.032916144 | 0.951293111 | 0.384012550 | TS13, Fig. 6, E = -1013.324 eV |             |             | 0.599251747                                       | 0.781917632 | 0.090222888  |
| 0.706543028 | 0.016056268 | 0.736833453 | 1.0                            |             |             | 0.549397707                                       | 0.930634797 | 0.609428048  |
| 0.365649074 | 0.320616573 | 0.070041873 | 13.6750001907                  |             |             | 0.157723933                                       | 0.136117965 | 0.255181730  |
| 0.019178065 | 0.668585241 | 0.402314693 | 0.0000000000                   |             |             | 0.875485361                                       | 0.586996973 | 0.268894628  |
| 0.008737548 | 0.310119361 | 0.725844145 | -6.8375000954                  |             |             | 0.087220088                                       | 0.232946530 | 0.601205111  |
| 0.672339380 | 0.631574452 | 0.082505837 | 0.0000000000                   |             |             | 0.718404233                                       | 0.546839833 | 0.939406574  |
| 0.344434381 | 0.984750450 | 0.395226997 | 0.0000000000                   |             |             | 0.395066351                                       | 0.854377270 | 0.273826301  |
| 0.905408502 | 0.121464252 | 0.487437636 | Al Si O H N Cu                 |             |             | 0.538280547                                       | 0.212456957 | 0.600284398  |
| 0.233302787 | 0.776140571 | 0.143147022 | 4 32 74 22 6 2                 |             |             | 0.233561695                                       | 0.298981696 | 0.932213724  |
| 0.913799942 | 0.419459969 | 0.490726948 | Direct                         |             |             | 0.875808060                                       | 0.881415784 | 0.264950544  |
| 0.559238791 | 0.730608404 | 0.792108297 | 0.244171470                    |             |             | 0.085039869                                       | 0.473362386 | 0.602996767  |
| 0.243689984 | 0.061714031 | 0.128363281 | 0.703655064                    |             |             | 0.704120636                                       | 0.762554228 | 0.944261909  |
| 0.920493066 | 0.752989352 | 0.154937267 | 0.131962970                    |             |             | 0.403222024                                       | 0.154115140 | 0.260912687  |
| 0.572900414 | 0.434431374 | 0.802726686 | 0.813858330                    |             |             | 0.781665325                                       | 0.931575239 | 0.613007784  |
| 0.798887134 | 0.887562752 | 0.780384600 | 0.248531252                    |             |             | 0.207085967                                       | 0.525368869 | 0.936438620  |
| 0.790344477 | 0.508531511 | 0.779957592 | 0.696763694                    |             |             | 0.468722939                                       | 0.287498802 | 0.931380630  |
| 0.802533090 | 0.540075421 | 0.094998114 | 0.358919442                    |             |             | 0.371309400                                       | 0.512878537 | 0.456993669  |
| 0.451061577 | 0.840814471 | 0.109905295 | 0.382965595                    |             |             | 0.604561210                                       | 0.620405674 | 0.416160941  |
| 0.117681555 | 0.191669092 | 0.429201901 | 0.898037851                    |             |             | 0.646756589                                       | 0.895443738 | 0.410626888  |
| 0.486431569 | 0.875393569 | 0.779629767 | 0.477037221                    |             |             | 0.303674012                                       | 0.189888984 | 0.456181049  |
| 0.144301280 | 0.175655976 | 0.074300081 | 0.479962319                    |             |             | 0.297772408                                       | 0.479608566 | 0.486463487  |
| 0.803988934 | 0.527405024 | 0.435742676 | 0.578372598                    |             |             | 0.198774502                                       | 0.406799972 | 0.226392671  |
| 0.588629544 | 0.091717802 | 0.483269989 | 0.242425442                    |             |             | 0.208554864                                       | 0.315875888 | 0.592586678  |
| 0.136388466 | 0.221290439 | 0.770142078 | 0.573776186                    |             |             | 0.155387953                                       | 0.390186608 | 0.334304392  |
| 0.454399765 | 0.876314700 | 0.441411823 | 0.908509374                    |             |             | 0.419536680                                       | 0.444348454 | 0.181739673  |
| 0.481526941 | 0.216704696 | 0.765883505 | 0.404242980                    |             |             | 0.433359027                                       | 0.567555010 | 0.158503547  |
| 0.817578256 | 0.885837018 | 0.429621756 | 0.698712587                    |             |             | 0.531890994                                       | 0.559798241 | 0.218076959  |
| 0.132581621 | 0.528075516 | 0.773812830 | 0.806096852                    |             |             | 0.686496377                                       | 0.667360246 | 0.558466673  |
| 0.812179804 | 0.854678631 | 0.089166857 | 0.041591700                    |             |             | 0.728691578                                       | 0.766255736 | 0.592788637  |
| 0.484024882 | 0.202211082 | 0.426595449 | 0.804144025                    |             |             | 0.710243702                                       | 0.659326315 | 0.656464458  |
| 0.157255277 | 0.552516580 | 0.120490544 | 0.727633511                    |             |             | 0.760934949                                       | 0.673212171 | 0.552046895  |
| 0.464340419 | 0.198276609 | 0.091817096 | 0.911342919                    |             |             | 0.463404477                                       | 0.495240837 | 0.688331167  |
| 0.269389153 | 0.443994015 | 0.794561863 | 0.472633749                    |             |             | 0.505930245                                       | 0.630040407 | 0.697848737  |
| 0.921880722 | 0.439731985 | 0.717832446 | 0.584987879                    |             |             | 0.385563672                                       | 0.544219315 | 0.646737397  |
| 0.239350110 | 0.766973019 | 0.410019964 | 0.139113367                    |             |             | 0.467805952                                       | 0.338432074 | 0.558466673  |
| 0.270289689 | 0.128681675 | 0.404253364 | 0.042723928                    |             |             | 0.414186895                                       | 0.396261841 | 0.484745264  |
| 0.551343501 | 0.076941669 | 0.712926093 | 0.376515388                    |             |             | 0.534383118                                       | 0.397573620 | 0.461259603  |
| 0.225081548 | 0.395650148 | 0.088361613 | 0.242320791                    |             |             | 0.440246761                                       | 0.715440154 | 0.393151373  |
| 0.925442040 | 0.092321448 | 0.717590749 | 0.806910336                    |             |             | 0.542701364                                       | 0.683267713 | 0.369156033  |
| 0.586915433 | 0.413111657 | 0.064583033 | 0.039323155                    |             |             | 0.492783040                                       | 0.742210686 | 0.287955195  |
| 0.669571459 | 0.955660582 | 0.455757589 | 0.703560174                    |             |             | 0.216631994                                       | 0.394579291 | 0.291780919  |
| 0.343141913 | 0.663060129 | 0.810776889 | 0.368222968                    |             |             | 0.446501374                                       | 0.522693698 | 0.208885863  |
| 0.354044646 | 0.307843059 | 0.786720514 | 0.567406416                    |             |             | 0.703601122                                       | 0.681553185 | 0.590812981  |
| 0.016670721 | 0.631720603 | 0.131104991 | 0.905956864                    |             |             | 0.467168361                                       | 0.561994255 | 0.653785467  |
| 0.054597490 | 0.338618487 | 0.464514464 | 0.131585851                    |             |             | 0.485256433                                       | 0.400171936 | 0.512012959  |
| 0.713025570 | 0.650412202 | 0.778918564 | 0.145394132                    |             |             | 0.474291503                                       | 0.690775037 | 0.342911899  |
| 0.025016241 | 0.969387233 | 0.131339386 | 0.705413342                    |             |             | 0.370261699                                       | 0.523102045 | 0.325538087  |
| 0.696788371 | 0.311097771 | 0.469771862 | 0.126163334                    |             |             | 0.545727193                                       | 0.584810615 | 0.535871029  |
| 0.361674131 | 0.991885126 | 0.135715172 | 0.386828661                    |             |             | 2[Cu(OH)] <sup>+</sup> , Fig. 6, E = -1013.593 eV |             |              |
| 0.783374965 | 0.460681379 | 0.604059279 | 0.041755214                    |             |             | 1.0                                               |             |              |
| 0.483688772 | 0.791021228 | 0.942282736 | 0.709037364                    |             |             | 13.6750001907                                     |             |              |
| 0.866980851 | 0.732875884 | 0.384108365 | 0.367460489                    |             |             | 0.0000000000                                      |             |              |
| 0.133036301 | 0.628220141 | 0.273998290 | 0.026038138                    |             |             | -6.8375000954                                     |             |              |
| 0.956047878 | 0.775873661 | 0.087005079 | 0.671949625                    |             |             | 0.0000000000                                      |             |              |
| 0.549145460 | 0.929657042 | 0.606523097 | 0.016538929                    |             |             | 0.0000000000                                      |             |              |
| 0.149947450 | 0.132237613 | 0.250554174 | 0.674602866                    |             |             | Al Si O H N Cu                                    |             |              |
| 0.869350910 | 0.583041012 | 0.266582698 | 0.636563540                    |             |             | 4 32 74 22 6 2                                    |             |              |
| 0.084443487 | 0.226152614 | 0.598958969 | 0.339263350                    |             |             | Direct                                            |             |              |
| 0.720767438 | 0.546665847 | 0.933797777 | 0.907391489                    |             |             | 0.244515061                                       |             |              |
| 0.389774889 | 0.870344698 | 0.272724509 | 0.236366808                    |             |             | 0.531553566                                       |             |              |
| 0.537849844 | 0.208870158 | 0.598478734 | 0.914020300                    |             |             | 0.708600342                                       |             |              |
| 0.233394355 | 0.300315112 | 0.930199385 | 0.568358362                    |             |             | 0.769951403                                       |             |              |
| 0.867706478 | 0.875382304 | 0.261085361 | 0.248237446                    |             |             | 0.097253472                                       |             |              |
| 0.086661227 | 0.476548046 | 0.603016138 | 0.925334215                    |             |             | 0.816128254                                       |             |              |
| 0.699738383 | 0.757576108 | 0.939042985 | 0.575081229                    |             |             | 0.253160596                                       |             |              |
| 0.394179821 | 0.135383219 | 0.260922313 | 0.805094481                    |             |             | 0.699612021                                       |             |              |
| 0.775637627 | 0.931301475 | 0.609208524 | 0.791731000                    |             |             | 0.363375127                                       |             |              |
| 0.205079749 | 0.518494964 | 0.938023686 | 0.803938091                    |             |             | 0.874794900                                       |             |              |
| 0.459218264 | 0.278047949 | 0.929075420 | 0.453174114                    |             |             | 0.384205699                                       |             |              |
| 0.361955106 | 0.491836190 | 0.459596843 | 0.121061049                    |             |             | 0.903727263                                       |             |              |
| 0.546127498 | 0.572315991 | 0.398066700 | 0.489136755                    |             |             | 0.480452180                                       |             |              |
| 0.653593361 | 0.915729702 | 0.398067504 | 0.879164457                    |             |             | 0.768609047                                       |             |              |
| 0.286882252 | 0.176455423 | 0.457768947 | 0.148222521                    |             |             | 0.481234372                                       |             |              |
| 0.285511255 | 0.455208691 | 0.484134078 | 0.810218573                    |             |             | 0.582063735                                       |             |              |
| 0.225528911 | 0.390052885 | 0.224074900 | 0.610524058                    |             |             | 0.245207399                                       |             |              |



|              |             |             |             |             |              |                                          |               |             |
|--------------|-------------|-------------|-------------|-------------|--------------|------------------------------------------|---------------|-------------|
| 0.367238939  | 0.873668969 | 0.164482459 | 0.513786137 | 0.631300330 | 0.709586263  | 0.600939870                              | 0.795024097   | 0.082832485 |
| 0.579402447  | 0.985297561 | 0.495226681 | 0.286800861 | 0.422498167 | 0.214694500  | 0.546223402                              | 0.942413747   | 0.602435946 |
| 0.903205454  | 0.638013303 | 0.166973367 | 0.231668428 | 0.353171587 | 0.3311638176 | 0.153508040                              | 0.132605663   | 0.253596902 |
| 0.136727661  | 0.661433935 | 0.377999216 | 0.250956237 | 0.480699658 | 0.295192868  | 0.861328125                              | 0.591872811   | 0.271479368 |
| 0.145901710  | 0.096868590 | 0.149198383 | 0.461447209 | 0.347815305 | 0.527126594  | 0.093927060                              | 0.241733238   | 0.597928464 |
| 0.704956293  | 0.303761572 | 0.725822985 | 0.521943212 | 0.464767247 | 0.210410357  | 0.712894619                              | 0.548305631   | 0.938753188 |
| 0.124303408  | 0.556203723 | 0.436955929 | 0.581303775 | 0.458109051 | 0.307041079  | 0.392559648                              | 0.853157878   | 0.271270275 |
| 0.387501359  | 0.642495215 | 0.059600156 | 0.285010785 | 0.158967525 | 0.470922332  | 0.539283156                              | 0.219225877   | 0.601285934 |
| 0.030988832  | 0.977866888 | 0.400450110 | 0.736337423 | 0.858693957 | 0.385824412  | 0.231662586                              | 0.306554347   | 0.931992829 |
| 0.712315917  | 0.019563591 | 0.726770043 | 0.247715846 | 0.537606537 | 0.048203796  | 0.882633507                              | 0.894065454   | 0.262036383 |
| 0.369339824  | 0.330082625 | 0.068856366 | 0.705147624 | 0.771027684 | 0.825891316  | 0.079410754                              | 0.479488760   | 0.603710651 |
| 0.300831346  | 0.681635496 | 0.397144854 | 0.131942511 | 0.109390520 | 0.367273718  | 0.712074101                              | 0.769725084   | 0.941458642 |
| 0.017902210  | 0.318840176 | 0.728186011 | 0.806405485 | 0.993568957 | 0.501299679  | 0.395598769                              | 0.163690180   | 0.262578189 |
| 0.669962943  | 0.644363999 | 0.084347017 | 0.249232518 | 0.324360251 | 0.823901415  | 0.793785512                              | 0.930719852   | 0.604799390 |
| 0.343270063  | 0.986812711 | 0.367860734 | 0.694262028 | 0.545507371 | 0.407001950  | 0.211932898                              | 0.524775743   | 0.934848505 |
| 0.926613092  | 0.120281614 | 0.479591638 | 0.363911539 | 0.876833141 | 0.372544485  | 0.476653367                              | 0.293994725   | 0.932752132 |
| 0.233517677  | 0.789296329 | 0.144336388 | 0.381429791 | 0.119197704 | 0.365717769  | 0.401556849                              | 0.597915530   | 0.505089104 |
| 0.908752918  | 0.426084816 | 0.485279381 | 0.896737933 | 0.641575873 | 0.373482317  | 0.556124806                              | 0.556268572   | 0.426215470 |
| 0.570029974  | 0.740014255 | 0.792400360 | 0.477382630 | 0.772678182 | 0.829685926  | 0.355018020                              | 0.644273221   | 0.377870262 |
| 0.249021560  | 0.072009966 | 0.126787975 | 0.478630155 | 0.770326793 | 0.044048116  | 0.698307812                              | 0.661971331   | 0.577631176 |
| 0.925447404  | 0.765341222 | 0.159670740 | 0.580552459 | 0.981636107 | 0.707622945  | 0.482238591                              | 0.557467997   | 0.671008170 |
| 0.575813890  | 0.444435206 | 0.800107300 | 0.244520694 | 0.311135918 | 0.441550883  | 0.286832062                              | 0.431206912   | 0.284708977 |
| 0.808573484  | 0.897578835 | 0.778634131 | 0.574174881 | 0.208706468 | 0.705872357  | 0.505828917                              | 0.434409648   | 0.275605470 |
| 0.794220984  | 0.514509678 | 0.787961304 | 0.910337210 | 0.878382981 | 0.365217119  | 0.391067262                              | 0.592249933   | 0.419669449 |
| 0.802866817  | 0.554335594 | 0.099490136 | 0.041318957 | 0.444714606 | 0.708642483  | 0.535162747                              | 0.582832515   | 0.544918716 |
| 0.49179232   | 0.858084857 | 0.095672913 | 0.697439551 | 0.768499315 | 0.047389511  | 0.433909893                              | 0.500031650   | 0.350351214 |
| 0.142379954  | 0.224419191 | 0.426783949 | 0.810036540 | 0.983527184 | 0.706597865  | TS15, Fig. 7, E = -976.111 eV            |               |             |
| 0.491996437  | 0.880742550 | 0.769650638 | 0.044336174 | 0.219564781 | 0.701475739  | 1.0                                      |               |             |
| 0.149744093  | 0.191013023 | 0.080775067 | 0.804949522 | 0.434859246 | 0.713355932  | 13.6750001907 0.0000000000 0.0000000000  |               |             |
| 0.518509131  | 0.554175258 | 0.447315186 | 0.473525196 | 0.318191677 | 0.825690389  | -6.8375000954 11.8428975619 0.0000000000 | 0.0000000000  |             |
| 0.608404458  | 0.116762973 | 0.485928923 | 0.912795961 | 0.874690056 | 0.158473253  | 0.0000000000 0.0000000000 0.0000000000   | 14.7670001984 |             |
| 0.141653791  | 0.226087034 | 0.769606650 | 0.474632472 | 0.312505692 | 0.040548660  | H Al Si O N Cu                           |               |             |
| 0.466817945  | 0.905062587 | 0.437269688 | 0.579575241 | 0.215345770 | 0.498766510  | 14 4 32 75 5 2                           | Direct        |             |
| 0.486934096  | 0.223840073 | 0.769330680 | 0.138978079 | 0.653372824 | 0.165625721  | 0.727643728 0.762366712 0.576388180      |               |             |
| 0.806486309  | 0.885577261 | 0.422547609 | 0.303995205 | 0.51078355  | 0.499478370  | 0.718694925 0.659345567 0.641403973      |               |             |
| 0.141797081  | 0.538312674 | 0.768963744 | 0.375355065 | 0.108383127 | 0.158363372  | 0.752918005 0.664337993 0.530933022      |               |             |
| 0.813408256  | 0.866249084 | 0.095349886 | 0.244922340 | 0.546361685 | 0.831150055  | 0.400835820 0.500781894 0.675190806      |               |             |
| 0.480751932  | 0.201069310 | 0.429825842 | 0.804754615 | 0.445991307 | 0.505878091  | 0.517256200 0.502820051 0.704100847      |               |             |
| 0.160504133  | 0.567494750 | 0.111792356 | 0.048414353 | 0.228426799 | 0.493282855  | 0.513743520 0.620308101 0.705142915      |               |             |
| 0.466876004  | 0.207698777 | 0.093814462 | 0.702561140 | 0.545930326 | 0.829010069  | 0.282682627 0.439167827 0.234216809      |               |             |
| 0.274990588  | 0.449253201 | 0.791612566 | 0.366133541 | 0.871752262 | 0.166166380  | 0.229111851 0.376015007 0.332438707      |               |             |
| 0.925491810  | 0.444370121 | 0.728870690 | 0.573624611 | 0.979768455 | 0.497178853  | 0.253691018 0.504404038 0.313886255      |               |             |
| 0.249986485  | 0.774455635 | 0.410262942 | 0.902008772 | 0.635846615 | 0.167062551  | 0.466047823 0.362914205 0.268441205      |               |             |
| 0.270079941  | 0.127684399 | 0.410347551 | 0.134330228 | 0.661067128 | 0.379059970  | 0.521746933 0.482782811 0.210722014      |               |             |
| 0.559489906  | 0.086467668 | 0.723235369 | 0.145050392 | 0.095844261 | 0.148952901  | 0.586380661 0.473330110 0.303257525      |               |             |
| 0.235121652  | 0.412419856 | 0.088884883 | 0.704591453 | 0.304687172 | 0.742753439  | 0.284866720 0.161171958 0.468522877      |               |             |
| 0.931557775  | 0.100825258 | 0.711480677 | 0.126948312 | 0.558488905 | 0.490557521  | 0.373069539 0.848611951 0.386536747      |               |             |
| 0.587836862  | 0.426119149 | 0.075207233 | 0.387415171 | 0.641899288 | 0.064194843  | 0.248395577 0.536057353 0.044336006      |               |             |
| 0.683564544  | 0.977741599 | 0.454454869 | 0.029767551 | 0.974817336 | 0.401263624  | 0.705094737 0.768651307 0.821673751      |               |             |
| 0.3533476240 | 0.667373240 | 0.805708647 | 0.019038023 | 0.712048829 | 0.723870635  | 0.131790906 0.108835392 0.365236491      |               |             |
| 0.358157337  | 0.312678337 | 0.793983400 | 0.367652774 | 0.325330526 | 0.069860650  | 0.806957424 0.992531121 0.496856898      |               |             |
| 0.016583411  | 0.638382077 | 0.139261395 | 0.024911787 | 0.675522804 | 0.398298353  | 0.249279907 0.320580897 0.823180676      |               |             |
| 0.045081396  | 0.341916263 | 0.464310348 | 0.016828911 | 0.318294019 | 0.729226351  | 0.695508540 0.546300650 0.043756153      |               |             |
| 0.719557881  | 0.658593535 | 0.780583918 | 0.669740856 | 0.642780900 | 0.085819751  | 0.366019994 0.876001596 0.368383616      |               |             |
| 0.030560855  | 0.981283009 | 0.127728835 | 0.354202360 | 0.992050588 | 0.373114765  | 0.379345775 0.115708858 0.365861893      |               |             |
| 0.689429641  | 0.337473989 | 0.471018583 | 0.924678266 | 0.120503552 | 0.481085420  | 0.899019132 0.640987575 0.369474739      |               |             |
| 0.3965576239 | 0.042903337 | 0.157931864 | 0.728559001 | 0.786574244 | 0.144989401  | 0.478210180 0.770301878 0.825263381      |               |             |
| 0.795662463  | 0.475385010 | 0.611002088 | 0.912246823 | 0.430024363 | 0.487077683  | 0.479726106 0.750785828 0.039296433      |               |             |
| 0.490936740  | 0.806776047 | 0.934338748 | 0.568076253 | 0.738769293 | 0.793237209  | 0.580875516 0.978576183 0.703330457      |               |             |
| 0.887358963  | 0.754945338 | 0.387051880 | 0.249650583 | 0.073761851 | 0.125734642  | 0.244750738 0.311268270 0.041249897      |               |             |
| 0.143075556  | 0.633524239 | 0.273262084 | 0.925605834 | 0.763619840 | 0.159751371  | 0.575964868 0.207027659 0.704627156      |               |             |
| 0.600914538  | 0.796272039 | 0.079743572 | 0.575405955 | 0.444008052 | 0.799793243  | 0.910023451 0.877366543 0.361588091      |               |             |
| 0.551754296  | 0.944093943 | 0.599806845 | 0.806465387 | 0.897461772 | 0.780655682  | 0.041794524 0.443023533 0.705594540      |               |             |
| 0.155000329  | 0.155000329 | 0.253241032 | 0.793975770 | 0.514411390 | 0.788383484  | 0.698276222 0.768539727 0.043040147      |               |             |
| 0.865516186  | 0.594002903 | 0.271933496 | 0.802670509 | 0.552851021 | 0.098685987  | 0.809951603 0.981229663 0.703097939      |               |             |
| 0.094338007  | 0.239751144 | 0.597797036 | 0.449748098 | 0.857789576 | 0.08079808   | 0.044206001 0.217522934 0.699836314      |               |             |
| 0.716024637  | 0.552256346 | 0.938256085 | 0.140144676 | 0.221429989 | 0.427237779  | 0.805518985 0.433073044 0.711241663      |               |             |
| 0.393898159  | 0.853817642 | 0.269305557 | 0.493028790 | 0.882840931 | 0.774041593  | 0.473357708 0.313563079 0.826534867      |               |             |
| 0.540873766  | 0.221655414 | 0.601198196 | 0.147596225 | 0.190215454 | 0.081415720  | 0.912945628 0.874258697 0.155927733      |               |             |
| 0.231764913  | 0.307514787 | 0.931844056 | 0.809950113 | 0.548635960 | 0.445716143  | 0.474810630 0.312353221 0.040502802      |               |             |
| 0.881991386  | 0.895168602 | 0.262572616 | 0.595374584 | 0.108055092 | 0.482293308  | 0.579153507 0.215280001 0.497887909      |               |             |
| 0.076547608  | 0.479851425 | 0.602433681 | 0.141633376 | 0.226460680 | 0.769302785  | 0.139824092 0.652651387 0.160866320      |               |             |
| 0.716241300  | 0.773336947 | 0.940468729 | 0.462327987 | 0.892156720 | 0.440199852  | 0.037791718 0.447653799 0.496034026      |               |             |
| 0.397299469  | 0.165105954 | 0.262344539 | 0.486321598 | 0.223771840 | 0.769434631  | 0.375743091 0.108282365 0.157744944      |               |             |
| 0.791540921  | 0.932656705 | 0.604123175 | 0.805997610 | 0.887311697 | 0.41019435   | 0.246412247 0.542210937 0.827586234      |               |             |
| 0.209217906  | 0.523838878 | 0.933408141 | 0.140525654 | 0.537446737 | 0.771059573  | 0.804201126 0.445058376 0.503494680      |               |             |
| 0.476481587  | 0.294012338 | 0.932652950 | 0.814205229 | 0.864861250 | 0.094467722  | 0.049428321 0.226792186 0.492012531      |               |             |
| 0.371213108  | 0.488743722 | 0.519084334 | 0.482083917 | 0.208629340 | 0.429571360  | 0.702515239 0.543910682 0.826347414      |               |             |
| 0.554665983  | 0.564346969 | 0.430918097 | 0.159008056 | 0.564609826 | 0.113127492  | 0.367574513 0.872341275 0.161663264      |               |             |
| 0.394805729  | 0.651198566 | 0.467395753 | 0.469668806 | 0.205869928 | 0.094013952  | 0.575725496 0.980141580 0.493268460      |               |             |
| 0.687830210  | 0.657001376 | 0.577947974 | 0.274532050 | 0.449510336 | 0.792163134  | 0.902312599 0.635126770 0.164537176      |               |             |
| 0.485758781  | 0.557290018 | 0.677527666 | 0.925294399 | 0.444608897 | 0.727961719  | 0.135198534 0.657408237 0.372960865      |               |             |
| 0.282233089  | 0.441856652 | 0.287884086 | 0.243096381 | 0.779080987 | 0.409791172  | 0.145231292 0.095302492 0.147255639      |               |             |
| 0.505416036  | 0.442748696 | 0.275572777 | 0.269062230 | 0.124927625 | 0.410633087  | 0.706948221 0.302017182 0.723269165      |               |             |
| 0.348969012  | 0.548896730 | 0.460170686 | 0.560874238 | 0.087768525 | 0.725790918  | 0.124994829 0.554476857 0.434532911      |               |             |
| 0.526125789  | 0.569354177 | 0.551464856 | 0.237191573 | 0.411867678 | 0.089539928  | 0.387746185 0.642299235 0.058940757      |               |             |

|                                                                                               |             |             |             |             |             |                                                                        |               |               |
|-----------------------------------------------------------------------------------------------|-------------|-------------|-------------|-------------|-------------|------------------------------------------------------------------------|---------------|---------------|
| 0.574100137                                                                                   | 0.440537333 | 0.800872386 | 0.246348083 | 0.310551465 | 0.041255064 | 0.289662480                                                            | 0.444980234   | 0.329784095   |
| 0.807380140                                                                                   | 0.894106328 | 0.775661528 | 0.574664414 | 0.205210820 | 0.704560399 | 0.510403991                                                            | 0.453908861   | 0.270552129   |
| 0.793102741                                                                                   | 0.511999428 | 0.785791993 | 0.909670591 | 0.876187205 | 0.362159252 | 0.340363413                                                            | 0.694607377   | 0.595201790   |
| 0.803920805                                                                                   | 0.553175807 | 0.095146559 | 0.040007293 | 0.441087872 | 0.707076609 | 0.547364950                                                            | 0.582176864   | 0.538489103   |
| 0.450025707                                                                                   | 0.857916236 | 0.092588454 | 0.696852624 | 0.765451372 | 0.043601770 | 0.447244585                                                            | 0.507127166   | 0.369588077   |
| 0.141687319                                                                                   | 0.220893323 | 0.426312268 | 0.809508324 | 0.980609715 | 0.703357816 | [Cu <sub>2</sub> (μ-O)] <sup>2+</sup> , Fig. 7, E = -957.589 eV<br>1.0 |               |               |
| 0.491958112                                                                                   | 0.879135549 | 0.768561900 | 0.043769721 | 0.216189027 | 0.700682282 |                                                                        |               |               |
| 0.147623152                                                                                   | 0.189332098 | 0.079564631 | 0.804311216 | 0.430362314 | 0.711600780 |                                                                        |               |               |
| 0.815273166                                                                                   | 0.550667048 | 0.444360971 | 0.472259820 | 0.314255625 | 0.823994637 | 13.6750001907                                                          | 0.0000000000  | 0.0000000000  |
| 0.595548511                                                                                   | 0.108138420 | 0.482153893 | 0.912557006 | 0.873001397 | 0.155977264 | -6.8375000954                                                          | 11.8428975619 | 0.0000000000  |
| 0.140024424                                                                                   | 0.223669842 | 0.769024134 | 0.474941075 | 0.311721683 | 0.039484370 | 0.0000000000                                                           | 0.0000000000  | 14.7670001984 |
| 0.465653658                                                                                   | 0.892504930 | 0.434988558 | 0.577663779 | 0.213452056 | 0.498417884 | H                                                                      | Al            | Si            |
| 0.489413381                                                                                   | 0.220485553 | 0.771127343 | 0.139652774 | 0.649715066 | 0.161974207 | 14                                                                     | 4             | 32            |
| 0.805251002                                                                                   | 0.883874059 | 0.418816328 | 0.038596749 | 0.447479278 | 0.497010648 | Direct                                                                 | 7             | 5             |
| 0.142771587                                                                                   | 0.534844339 | 0.767128170 | 0.375576317 | 0.105731986 | 0.562216905 | 0.727855206                                                            | 0.766796827   | 0.581645131   |
| 0.815905213                                                                                   | 0.864099205 | 0.089731634 | 0.245872155 | 0.540947795 | 0.827896595 | 0.714651823                                                            | 0.660896958   | 0.645903766   |
| 0.480056018                                                                                   | 0.804600537 | 0.429431528 | 0.840660037 | 0.442283690 | 0.503070712 | 0.756591618                                                            | 0.670944520   | 0.536935687   |
| 0.158640414                                                                                   | 0.565419078 | 0.105264984 | 0.049869833 | 0.226171881 | 0.492617369 | 0.392401844                                                            | 0.507723451   | 0.662008524   |
| 0.471877515                                                                                   | 0.208362922 | 0.096503891 | 0.700041533 | 0.542463183 | 0.824746490 | 0.503130257                                                            | 0.500385582   | 0.690340384   |
| 0.276458889                                                                                   | 0.445495129 | 0.788676679 | 0.367519081 | 0.869463027 | 0.161932021 | 0.507577538                                                            | 0.621802330   | 0.697981596   |
| 0.927547395                                                                                   | 0.446267247 | 0.725224733 | 0.573688984 | 0.977184057 | 0.494906247 | 0.280268073                                                            | 0.433827758   | 0.261257142   |
| 0.247993916                                                                                   | 0.771369287 | 0.403825790 | 0.901502609 | 0.634457052 | 0.16481258  | 0.236242235                                                            | 0.367176116   | 0.359667122   |
| 0.267398030                                                                                   | 0.122188903 | 0.410222739 | 0.135317296 | 0.656756103 | 0.372662157 | 0.256565988                                                            | 0.495302409   | 0.346969008   |
| 0.562352538                                                                                   | 0.085368149 | 0.720854640 | 0.145533904 | 0.093367405 | 0.146628425 | 0.467341632                                                            | 0.368475914   | 0.263738722   |
| 0.237180963                                                                                   | 0.411853164 | 0.089183606 | 0.706003189 | 0.299196482 | 0.722870708 | 0.512033701                                                            | 0.488518029   | 0.208132669   |
| 0.931307971                                                                                   | 0.097694747 | 0.707842827 | 0.125025272 | 0.555493295 | 0.436437666 | 0.591818869                                                            | 0.479294658   | 0.288563569   |
| 0.587076902                                                                                   | 0.426294059 | 0.072407313 | 0.386044741 | 0.638862789 | 0.064746693 | 0.283247560                                                            | 0.151579469   | 0.468443513   |
| 0.683901310                                                                                   | 0.979206502 | 0.453719497 | 0.028074356 | 0.973937273 | 0.398686558 | 0.731563568                                                            | 0.843148410   | 0.389753252   |
| 0.352907985                                                                                   | 0.665212274 | 0.803712308 | 0.712026834 | 0.016486039 | 0.721378386 | 0.247099146                                                            | 0.533319771   | 0.045856159   |
| 0.356440663                                                                                   | 0.305476576 | 0.794565022 | 0.370640963 | 0.328014493 | 0.071162350 | 0.704003870                                                            | 0.767095566   | 0.821693182   |
| 0.016697578                                                                                   | 0.637032926 | 0.138382778 | 0.027835701 | 0.675654173 | 0.386404753 | 0.132121384                                                            | 0.107792892   | 0.364667740   |
| 0.044645991                                                                                   | 0.339576393 | 0.461647809 | 0.014740149 | 0.314325035 | 0.726719558 | 0.807023287                                                            | 0.992412806   | 0.497055173   |
| 0.718648434                                                                                   | 0.655659974 | 0.777663946 | 0.668878019 | 0.639589012 | 0.082054190 | 0.249443129                                                            | 0.319449097   | 0.982243406   |
| 0.031898100                                                                                   | 0.978063941 | 0.124669790 | 0.355269521 | 0.987972975 | 0.369936973 | 0.695247233                                                            | 0.543675423   | 0.042684823   |
| 0.691298366                                                                                   | 0.331850529 | 0.470507056 | 0.926146150 | 0.119200170 | 0.478896081 | 0.366194099                                                            | 0.873765290   | 0.367973626   |
| 0.394844323                                                                                   | 0.002126079 | 0.154590887 | 0.234048530 | 0.783052623 | 0.142738387 | 0.3813532047                                                           | 0.135320473   | 0.363166273   |
| 0.794530094                                                                                   | 0.474149346 | 0.608842432 | 0.909739373 | 0.422150135 | 0.483381182 | 0.896299232                                                            | 0.639072180   | 0.368986607   |
| 0.492603809                                                                                   | 0.804292760 | 0.932032347 | 0.567388415 | 0.733966589 | 0.786641181 | 0.477141678                                                            | 0.767028749   | 0.826574951   |
| 0.884837985                                                                                   | 0.751154065 | 0.382714778 | 0.248842701 | 0.068687290 | 0.125126362 | 0.477793664                                                            | 0.766033292   | 0.041299380   |
| 0.143223211                                                                                   | 0.626242757 | 0.269332141 | 0.926178694 | 0.762570322 | 0.159644902 | 0.579773009                                                            | 0.976651669   | 0.704334617   |
| 0.601875484                                                                                   | 0.795372784 | 0.078823209 | 0.572048485 | 0.441003054 | 0.796721697 | 0.246337920                                                            | 0.310638785   | 0.041272849   |
| 0.548091352                                                                                   | 0.939447820 | 0.597940624 | 0.806073070 | 0.893296182 | 0.776088655 | 0.574594140                                                            | 0.205340073   | 0.704282820   |
| 0.152385488                                                                                   | 0.131944925 | 0.251798630 | 0.790478706 | 0.509118974 | 0.785372019 | 0.909755349                                                            | 0.876105309   | 0.362199157   |
| 0.861890554                                                                                   | 0.587777376 | 0.268470168 | 0.806386530 | 0.554579616 | 0.092330329 | 0.040055461                                                            | 0.441124499   | 0.706797390   |
| 0.094761916                                                                                   | 0.239945412 | 0.596642911 | 0.450449824 | 0.856522560 | 0.092370845 | 0.696760692                                                            | 0.765273809   | 0.043599997   |
| 0.715882063                                                                                   | 0.551380098 | 0.935712636 | 0.142262325 | 0.219547614 | 0.426843077 | 0.809244472                                                            | 0.980508506   | 0.703469098   |
| 0.395954996                                                                                   | 0.855155706 | 0.266742170 | 0.493469596 | 0.879004539 | 0.771993876 | 0.043651931                                                            | 0.216053918   | 0.700616181   |
| 0.540709674                                                                                   | 0.220922843 | 0.600874543 | 0.150163621 | 0.187103242 | 0.077564754 | 0.804264247                                                            | 0.430302411   | 0.711356580   |
| 0.232184052                                                                                   | 0.305883139 | 0.931364894 | 0.581876365 | 0.548072278 | 0.444163531 | 0.472269148                                                            | 0.314290343   | 0.823817074   |
| 0.881447256                                                                                   | 0.894292891 | 0.258942336 | 0.912046142 | 0.104738034 | 0.484629393 | 0.912568808                                                            | 0.872974873   | 0.156005129   |
| 0.078650922                                                                                   | 0.477444023 | 0.600110233 | 0.138632521 | 0.221738771 | 0.770426631 | 0.474932402                                                            | 0.311664104   | 0.039423708   |
| 0.711522877                                                                                   | 0.769068301 | 0.937317669 | 0.464091420 | 0.888450801 | 0.664116815 | 0.577938085                                                            | 0.213446259   | 0.498187423   |
| 0.394026846                                                                                   | 0.159160525 | 0.262785196 | 0.489544988 | 0.219893650 | 0.771800578 | 0.139634714                                                            | 0.649550974   | 0.162001342   |
| 0.791866779                                                                                   | 0.928969324 | 0.600760520 | 0.805241062 | 0.883585215 | 0.419281453 | 0.039051831                                                            | 0.447785020   | 0.496999294   |
| 0.212086409                                                                                   | 0.519006371 | 0.930896819 | 0.141251311 | 0.532657325 | 0.768403590 | 0.375496894                                                            | 0.105573446   | 0.156204164   |
| 0.475523978                                                                                   | 0.288654208 | 0.933426440 | 0.814410210 | 0.860608041 | 0.090143114 | 0.245944634                                                            | 0.541093647   | 0.764282864   |
| 0.336049378                                                                                   | 0.542081219 | 0.512087470 | 0.477971962 | 0.204525188 | 0.428752840 | 0.804788589                                                            | 0.442191154   | 0.502954900   |
| 0.562928319                                                                                   | 0.569029748 | 0.425715178 | 0.154954612 | 0.561569452 | 0.104494743 | 0.049930736                                                            | 0.226259515   | 0.492561698   |
| 0.339701921                                                                                   | 0.700705030 | 0.554780304 | 0.469115257 | 0.204187229 | 0.292136666 | 0.699842274                                                            | 0.542298436   | 0.346259569   |
| 0.704194129                                                                                   | 0.677635908 | 0.576401770 | 0.274976224 | 0.444101602 | 0.788243592 | 0.367211014                                                            | 0.869262040   | 0.162062302   |
| 0.486915201                                                                                   | 0.546331048 | 0.667805195 | 0.925994515 | 0.443907569 | 0.728530645 | 0.573540072                                                            | 0.767885915   | 0.490559848   |
| 0.286262095                                                                                   | 0.452119619 | 0.303507268 | 0.246831596 | 0.772425234 | 0.403766721 | 0.901465714                                                            | 0.634406567   | 0.164854974   |
| 0.509356916                                                                                   | 0.449148327 | 0.274614602 | 0.267736584 | 0.119270541 | 0.407502800 | 0.135557532                                                            | 0.056682432   | 0.372821182   |
| 0.320189476                                                                                   | 0.604576051 | 0.563014090 | 0.560279667 | 0.083051100 | 0.719648838 | 0.145541400                                                            | 0.093379855   | 0.464646622   |
| 0.544105589                                                                                   | 0.575042069 | 0.543943703 | 0.23345374  | 0.407730013 | 0.088982277 | 0.705896974                                                            | 0.299205720   | 0.722603142   |
| 0.436496913                                                                                   | 0.50794354  | 0.359828591 | 0.930746078 | 0.096635491 | 0.708256006 | 0.126473904                                                            | 0.555919290   | 0.436796010   |
|                                                                                               |             |             | 0.590993822 | 0.421291113 | 0.072219163 | 0.386261016                                                            | 0.638624310   | 0.064676531   |
| [Cu <sub>2</sub> (μ-O)] <sup>2+</sup> + ads(NO <sub>2</sub> ), Fig. 7, E = -976.368 eV<br>1.0 |             |             |             |             |             | 0.028424111                                                            | 0.973928332   | 0.398600221   |
|                                                                                               |             |             | 0.683066487 | 0.978619516 | 0.455637991 | 0.711761117                                                            | 0.016247900   | 0.721511841   |
|                                                                                               |             |             | 0.351742059 | 0.663819551 | 0.802161574 | 0.370688707                                                            | 0.328036010   | 0.071187288   |
|                                                                                               |             |             | 0.355180562 | 0.304091841 | 0.789808035 | 0.027571828                                                            | 0.674731195   | 0.386651708   |
|                                                                                               |             |             | 0.015920322 | 0.644220931 | 0.462621480 | 0.014597175                                                            | 0.314158380   | 0.726525426   |
|                                                                                               |             |             | 0.049813695 | 0.341645896 | 0.462621480 | 0.668804586                                                            | 0.639488285   | 0.262168229   |
|                                                                                               |             |             | 0.719425738 | 0.655716360 | 0.776674390 | 0.355267733                                                            | 0.988101125   | 0.369994640   |
|                                                                                               |             |             | 0.030544050 | 0.977670670 | 0.124279626 | 0.926212430                                                            | 0.119191110   | 0.478827477   |
|                                                                                               |             |             | 0.690974891 | 0.328995556 | 0.471118152 | 0.233821154                                                            | 0.782938898   | 0.142780393   |
|                                                                                               |             |             | 0.394414991 | 0.999310374 | 0.156134188 | 0.910244773                                                            | 0.422556192   | 0.483001888   |
|                                                                                               |             |             | 0.795930684 | 0.471153140 | 0.608599544 | 0.567355931                                                            | 0.733741403   | 0.786631584   |
|                                                                                               |             |             | 0.848765091 | 0.795654893 | 0.933342993 | 0.246887416                                                            | 0.068382248   | 0.125095323   |
|                                                                                               |             |             | 0.884647428 | 0.750345886 | 0.384968132 | 0.926350653                                                            | 0.762618065   | 0.159564629   |
|                                                                                               |             |             | 0.146820188 | 0.624701381 | 0.270094544 | 0.571870565                                                            | 0.441099495   | 0.776280921   |
|                                                                                               |             |             | 0.600893795 | 0.792560220 | 0.079776488 | 0.806405561                                                            | 0.893236339   | 0.76104569    |
|                                                                                               |             |             | 0.545648515 | 0.934070587 | 0.599429429 | 0.790098667                                                            | 0.508901775   | 0.785083890   |
|                                                                                               |             |             | 0.153018981 | 0.131448299 | 0.250985116 | 0.806385279                                                            | 0.554595172   | 0.092323230   |
|                                                                                               |             |             | 0.855297267 | 0.587448180 | 0.267960012 | 0.449985623                                                            | 0.595196642   | 0.092404135   |
|                                                                                               |             |             | 0.094347157 | 0.238105297 | 0.597431958 | 0.142391310                                                            | 0.219606625   | 0.426866859   |
|                                                                                               |             |             | 0.712206690 | 0.549273014 | 0.934160650 | 0.493598342                                                            | 0.879135489   | 0.772297680   |
|                                                                                               |             |             | 0.395942718 | 0.850372732 | 0.266634613 | 0.150221512                                                            | 0.187146351   | 0.077612266   |
|                                                                                               |             |             | 0.538792431 | 0.219828919 | 0.601089606 | 0.552741619                                                            | 0.547897577   | 0.444201529   |
|                                                                                               |             |             | 0.237853140 | 0.306478411 | 0.930984259 | 0.159214149                                                            | 0.104645148   | 0.4484567106  |
|                                                                                               |             |             | 0.881718755 | 0.892863512 | 0.259256244 | 0.138563454                                                            | 0.221655381   |               |

|             |             |             |             |             |             |             |              |             |
|-------------|-------------|-------------|-------------|-------------|-------------|-------------|--------------|-------------|
| 0.246651158 | 0.772387862 | 0.404484272 | 0.704929709 | 0.303348392 | 0.726895869 | 0.561649561 | 0.441986322  | 0.210160807 |
| 0.267720580 | 0.119182803 | 0.407570541 | 0.125114560 | 0.554606378 | 0.435643286 | 0.597049952 | 0.494328648  | 0.313850313 |
| 0.559951127 | 0.083106600 | 0.719628155 | 0.386543065 | 0.642375708 | 0.058768298 | 0.285924971 | 0.171121433  | 0.465849310 |
| 0.233370617 | 0.407796264 | 0.089014105 | 0.029776601 | 0.974781692 | 0.403378010 | 0.725210309 | 0.824840724  | 0.405098110 |
| 0.930692434 | 0.096464664 | 0.708271384 | 0.711776257 | 0.018777056 | 0.728336318 | 0.241527438 | 0.534745753  | 0.045106694 |
| 0.590926945 | 0.421189427 | 0.072437607 | 0.365865022 | 0.328403205 | 0.066358320 | 0.706002891 | 0.773462176  | 0.828605592 |
| 0.683148086 | 0.978619516 | 0.455663711 | 0.028790506 | 0.678585231 | 0.399696916 | 0.126628816 | 0.105211467  | 0.367389441 |
| 0.351747930 | 0.663808465 | 0.801948011 | 0.017016886 | 0.318158001 | 0.728504121 | 0.802524626 | 0.991517067  | 0.496594161 |
| 0.355037183 | 0.303863794 | 0.789676845 | 0.670217037 | 0.645755470 | 0.083475843 | 0.245938271 | 0.321446002  | 0.822816670 |
| 0.015935114 | 0.634470224 | 0.143742889 | 0.345969230 | 0.987520814 | 0.375066131 | 0.690814793 | 0.544148147  | 0.046925236 |
| 0.049879774 | 0.341684699 | 0.462412685 | 0.925685108 | 0.119013965 | 0.478748530 | 0.361589462 | 0.876562774  | 0.372494042 |
| 0.719394863 | 0.655662835 | 0.776609004 | 0.232694909 | 0.789703488 | 0.144588931 | 0.376734823 | 0.116846837  | 0.366349757 |
| 0.030467289 | 0.977763176 | 0.124318667 | 0.909274638 | 0.426322460 | 0.483999461 | 0.895753980 | 0.639696419  | 0.371683955 |
| 0.691357613 | 0.328912675 | 0.470975101 | 0.568638742 | 0.738449872 | 0.795239270 | 0.474805802 | 0.771849453  | 0.830278218 |
| 0.394491017 | 0.999245942 | 0.156042635 | 0.247658268 | 0.073332004 | 0.129838914 | 0.472764224 | 0.764647901  | 0.044222444 |
| 0.795898795 | 0.471261173 | 0.608362377 | 0.922709823 | 0.763941169 | 0.159729242 | 0.579852283 | 0.980049551  | 0.706886590 |
| 0.488914669 | 0.795466098 | 0.933287621 | 0.574503243 | 0.443331122 | 0.802472532 | 0.234843940 | 0.306038588  | 0.039383203 |
| 0.885014474 | 0.750312567 | 0.385069758 | 0.807764351 | 0.895838499 | 0.777335227 | 0.571214318 | 0.207996070  | 0.705877483 |
| 0.146918267 | 0.624550462 | 0.270175248 | 0.793272972 | 0.514435053 | 0.787210643 | 0.910049736 | 0.878186285  | 0.367140800 |
| 0.600807428 | 0.792329490 | 0.079713278 | 0.800056517 | 0.552523613 | 0.100701764 | 0.038438547 | 0.442330509  | 0.706301868 |
| 0.545548439 | 0.934214652 | 0.599498868 | 0.448451310 | 0.857627273 | 0.097526632 | 0.696763515 | 0.770642698  | 0.040880479 |
| 0.153344765 | 0.131626353 | 0.251016021 | 0.141552672 | 0.222724065 | 0.427828848 | 0.809259713 | 0.983528674  | 0.704608381 |
| 0.855060935 | 0.587330520 | 0.267999709 | 0.490407228 | 0.787852291 | 0.768697619 | 0.043023691 | 0.218945503  | 0.698477924 |
| 0.094394684 | 0.238086855 | 0.597351253 | 0.146675244 | 0.190717310 | 0.082653672 | 0.803175986 | 0.435242981  | 0.712501287 |
| 0.711893618 | 0.549136102 | 0.934133112 | 0.812259853 | 0.550406694 | 0.446067512 | 0.472341239 | 0.316591591  | 0.826348841 |
| 0.395481795 | 0.850254059 | 0.266822994 | 0.600649714 | 0.112478808 | 0.481545627 | 0.911276877 | 0.873938799  | 0.159443870 |
| 0.538997769 | 0.220155016 | 0.600819230 | 0.141365409 | 0.224870324 | 0.768417537 | 0.469247788 | 0.313909411  | 0.040889934 |
| 0.237726614 | 0.306536674 | 0.931005299 | 0.464308828 | 0.897037208 | 0.439667374 | 0.574939489 | 0.215112388  | 0.500548840 |
| 0.881743729 | 0.892818987 | 0.252999010 | 0.486133516 | 0.223793699 | 0.769307971 | 0.136062443 | 0.654512584  | 0.163281426 |
| 0.75932458  | 0.475825071 | 0.601629555 | 0.805216849 | 0.884191871 | 0.422906369 | 0.035704117 | 0.448425591  | 0.496161968 |
| 0.710351169 | 0.767500818 | 0.937430024 | 0.141388774 | 0.538018584 | 0.768064320 | 0.373896360 | 0.107683815  | 0.157777473 |
| 0.396087915 | 0.160006791 | 0.260378718 | 0.811823070 | 0.867101610 | 0.097788580 | 0.242548168 | 0.545349896  | 0.828338444 |
| 0.791924000 | 0.928558052 | 0.600956857 | 0.478297532 | 0.204838395 | 0.432611108 | 0.801616013 | 0.446015984  | 0.504603544 |
| 0.214784309 | 0.519993544 | 0.931516945 | 0.159891322 | 0.567841113 | 0.112196863 | 0.043297067 | 0.226355299  | 0.489424855 |
| 0.473805487 | 0.299302974 | 0.931321263 | 0.468190223 | 0.210726663 | 0.098102614 | 0.700389802 | 0.543736875  | 0.829258978 |
| 0.581395268 | 0.581252396 | 0.423058063 | 0.272714198 | 0.447604865 | 0.792217731 | 0.364595652 | 0.872307301  | 0.165403828 |
| 0.704331398 | 0.681782961 | 0.580315530 | 0.925208092 | 0.444254637 | 0.728679061 | 0.570699811 | 0.978949070  | 0.498108536 |
| 0.478848070 | 0.549530447 | 0.657781601 | 0.247415736 | 0.773778439 | 0.411066592 | 0.897875249 | 0.632713199  | 0.165741220 |
| 0.289777249 | 0.444897443 | 0.330417961 | 0.267009676 | 0.124857850 | 0.412009388 | 0.131834462 | 0.658193409  | 0.376944363 |
| 0.510393202 | 0.454696625 | 0.270522773 | 0.559515655 | 0.086038776 | 0.727267265 | 0.140490487 | 0.088740043  | 0.147423416 |
| 0.547679543 | 0.581895351 | 0.538193941 | 0.233058825 | 0.412116289 | 0.089251645 | 0.700955689 | 0.305926293  | 0.724155605 |
| 0.447635531 | 0.507652164 | 0.370034426 | 0.331085944 | 0.099896528 | 0.711443305 | 0.124704204 | 0.555382371  | 0.436209202 |
|             |             |             | 0.584577382 | 0.427842259 | 0.073606290 | 0.382532448 | 0.635358393  | 0.062223069 |
|             |             |             | 0.682635605 | 0.978092611 | 0.454133838 | 0.026825404 | 0.972897887  | 0.409174711 |
|             |             |             | 0.352092057 | 0.666433394 | 0.805936098 | 0.711454391 | 0.018413180  | 0.724307239 |
|             |             |             | 0.356592327 | 0.311223596 | 0.797516763 | 0.360993803 | 0.326297134  | 0.065236270 |
|             |             |             | 0.015645161 | 0.638763249 | 0.138040796 | 0.023809516 | 0.674881995  | 0.398426980 |
|             |             |             | 0.043868400 | 0.340467900 | 0.463001102 | 0.014528911 | 0.316378772  | 0.728777587 |
|             |             |             | 0.718416095 | 0.658008993 | 0.781241715 | 0.670997739 | 0.644534230  | 0.083276644 |
|             |             |             | 0.029726433 | 0.979891300 | 0.127441838 | 0.346834868 | 0.988808334  | 0.376521885 |
|             |             |             | 0.689181209 | 0.334573627 | 0.471407955 | 0.920645118 | 0.117686182  | 0.476520956 |
|             |             |             | 0.395318240 | 0.004624906 | 0.156219199 | 0.230723456 | 0.788125575  | 0.145976126 |
|             |             |             | 0.794942439 | 0.473709196 | 0.610555887 | 0.908728600 | 0.429999590  | 0.484109789 |
|             |             |             | 0.487869650 | 0.807876110 | 0.568321884 | 0.739921808 | 0.797033774  | 0.797033774 |
|             |             |             | 0.885193348 | 0.752223134 | 0.387861699 | 0.247823283 | 0.070877299  | 0.125306845 |
|             |             |             | 0.140833497 | 0.634176254 | 0.273084372 | 0.915012062 | 0.757948160  | 0.160755306 |
|             |             |             | 0.599971473 | 0.796852410 | 0.078517474 | 0.574787855 | 0.441303641  | 0.797007322 |
|             |             |             | 0.552758336 | 0.946976542 | 0.600544512 | 0.805799246 | 0.894594550  | 0.775750041 |
|             |             |             | 0.149594426 | 0.133922905 | 0.254944831 | 0.794316769 | 0.516627550  | 0.787161648 |
|             |             |             | 0.865965962 | 0.593204260 | 0.271950752 | 0.796998441 | 0.547297716  | 0.099251829 |
|             |             |             | 0.093069926 | 0.240162417 | 0.597604990 | 0.444851190 | 0.852393031  | 0.098355524 |
|             |             |             | 0.717027247 | 0.552415013 | 0.938396692 | 0.134990066 | 0.220039502  | 0.423219532 |
|             |             |             | 0.392599046 | 0.856608450 | 0.492646694 | 0.883292377 | 0.774990320  | 0.774990320 |
|             |             |             | 0.541563988 | 0.219177216 | 0.602367103 | 0.142752588 | 0.184972927  | 0.082373299 |
|             |             |             | 0.225149736 | 0.304958731 | 0.932126224 | 0.805969954 | 0.547899425  | 0.443484247 |
|             |             |             | 0.883164287 | 0.895330191 | 0.263887227 | 0.590081811 | 0.106940016  | 0.487936586 |
|             |             |             | 0.075527593 | 0.477966189 | 0.601790667 | 0.142072573 | 0.225339070  | 0.763745368 |
|             |             |             | 0.719778001 | 0.777515769 | 0.940842986 | 0.458895057 | 0.891643047  | 0.441342473 |
|             |             |             | 0.395591766 | 0.161746204 | 0.265355766 | 0.483721107 | 0.219076529  | 0.773183644 |
|             |             |             | 0.789763987 | 0.932749033 | 0.63874505  | 0.803145528 | 0.881953835  | 0.422355205 |
|             |             |             | 0.207422912 | 0.523789346 | 0.933430076 | 0.139150932 | 0.536604404  | 0.766790688 |
|             |             |             | 0.476019830 | 0.289721906 | 0.933715999 | 0.808325231 | 0.865416646  | 0.102097027 |
|             |             |             | 0.380169034 | 0.571569280 | 0.500384986 | 0.479302883 | 0.207657412  | 0.428741753 |
|             |             |             | 0.545110464 | 0.607584119 | 0.418047637 | 0.156539336 | 0.5666918790 | 0.109785184 |
|             |             |             | 0.401211917 | 0.668039799 | 0.373110265 | 0.466589987 | 0.209183246  | 0.095433064 |
|             |             |             | 0.696112812 | 0.661679447 | 0.578286111 | 0.272064984 | 0.447266519  | 0.792327523 |
|             |             |             | 0.479944795 | 0.554799914 | 0.674365103 | 0.922631741 | 0.442673117  | 0.726514816 |
|             |             |             | 0.277515858 | 0.427607328 | 0.287927717 | 0.243035600 | 0.773651898  | 0.407774597 |
|             |             |             | 0.515828192 | 0.431261182 | 0.277622551 | 0.266173005 | 0.126176998  | 0.410364866 |
|             |             |             | 0.415369421 | 0.601897240 | 0.418633431 | 0.561985433 | 0.087866992  | 0.720663548 |
|             |             |             | 0.530890524 | 0.590051532 | 0.549021900 | 0.220122397 | 0.404008955  | 0.084210590 |
|             |             |             | 0.429808944 | 0.494519323 | 0.341672093 | 0.930933595 | 0.099025324  | 0.709583402 |
|             |             |             |             |             |             | 0.580536187 | 0.426032633  | 0.078474596 |
|             |             |             |             |             |             | 0.678387463 | 0.978606880  | 0.457504481 |
|             |             |             |             |             |             | 0.351390034 | 0.666741014  | 0.802902699 |
|             |             |             |             |             |             | 0.356538147 | 0.311637491  | 0.796118796 |
|             |             |             |             |             |             | 0.013004289 | 0.637682140  | 0.136931404 |
|             |             |             |             |             |             | 0.037978616 | 0.338762075  | 0.459132493 |
|             |             |             |             |             |             | 0.717550039 | 0.658621252  | 0.786622286 |
|             |             |             |             |             |             | 0.029335557 | 0.971523643  | 0.119689003 |
|             |             |             |             |             |             | 0.688612759 | 0.330921769  | 0.474441975 |
|             |             |             |             |             |             | 0.395358592 | 0.002979116  | 0.154334709 |
|             |             |             |             |             |             | 0.794472098 | 0.477252424  | 0.609817386 |
|             |             |             |             |             |             | 0.482311219 | 0.800348699  | 0.937444091 |
|             |             |             |             |             |             | 0.880900025 | 0.749581218  | 0.383271366 |
|             |             |             |             |             |             | 0.136163518 | 0.630363703  | 0.272073686 |
|             |             |             |             |             |             | 0.595611393 | 0.790881693  | 0.081971481 |
|             |             |             |             |             |             | 0.544985890 | 0.936370373  | 0.602587759 |
|             |             |             |             |             |             | 0.142968550 | 0.119193479  | 0.252947718 |
|             |             |             |             |             |             | 0.861193955 | 0.586916983  | 0.270321846 |
|             |             |             |             |             |             | 0.089167729 | 0.241325602  | 0.594030082 |

TS16, Fig. 7, E = -976.520 eV

1.0

13.6750001907

0.0000000000

0.0000000000

-6.8375

|                                                                        |               |              |               |             |             |             |             |              |
|------------------------------------------------------------------------|---------------|--------------|---------------|-------------|-------------|-------------|-------------|--------------|
| 0.708168983                                                            | 0.543935835   | 0.938861787  | 0.146774143   | 0.186577588 | 0.078457564 | 0.908540606 | 0.870660782 | 0.157634571  |
| 0.392458022                                                            | 0.857252061   | 0.270923018  | 0.812208831   | 0.550376654 | 0.445523113 | 0.469726026 | 0.311623871 | 0.041310035  |
| 0.533689857                                                            | 0.221076742   | 0.62059109   | 0.592757285   | 0.108215012 | 0.482607335 | 0.573429236 | 0.211885899 | 0.50336111   |
| 0.220131174                                                            | 0.298087806   | 0.929714799  | 0.141432479   | 0.227201715 | 0.767488480 | 0.136066943 | 0.648334086 | 0.166398808  |
| 0.894159555                                                            | 0.903271973   | 0.263526171  | 0.459904475   | 0.891161859 | 0.441367626 | 0.033238408 | 0.446048081 | 0.498702377  |
| 0.074361637                                                            | 0.474518448   | 0.600755572  | 0.483984947   | 0.221435785 | 0.771235704 | 0.371481836 | 0.104101025 | 0.158540443  |
| 0.719501019                                                            | 0.780899349   | 0.943475068  | 0.802840769   | 0.882957280 | 0.421579927 | 0.239320740 | 0.546144783 | 0.830303133  |
| 0.393755883                                                            | 0.158578221   | 0.262698859  | 0.139124200   | 0.537472785 | 0.768310010 | 0.799691916 | 0.443415701 | 0.504360914  |
| 0.791453302                                                            | 0.931925833   | 0.602057159  | 0.812851429   | 0.861071646 | 0.091246583 | 0.040419362 | 0.224332571 | 0.490545750  |
| 0.207368702                                                            | 0.526360393   | 0.931556642  | 0.477874994   | 0.206827432 | 0.430417180 | 0.700221837 | 0.545475960 | 0.4827865124 |
| 0.477985889                                                            | 0.296720356   | 0.933701277  | 0.153476700   | 0.556791246 | 0.113320045 | 0.364711046 | 0.869273782 | 0.166657656  |
| 0.416674644                                                            | 0.601870000   | 0.491479248  | 0.464173734   | 0.203726739 | 0.092457585 | 0.567602754 | 0.977152705 | 0.499743988  |
| 0.585181296                                                            | 0.694813848   | 0.434432060  | 0.273890108   | 0.450015426 | 0.791855812 | 0.899315894 | 0.632497668 | 0.166808132  |
| 0.437439382                                                            | 0.665278971   | 0.350717515  | 0.923327506   | 0.443840265 | 0.727525949 | 0.130353242 | 0.655505180 | 0.377766252  |
| 0.716636777                                                            | 0.694202304   | 0.596414328  | 0.243795291   | 0.774118066 | 0.406901926 | 0.140100593 | 0.090761371 | 0.148196205  |
| 0.484967619                                                            | 0.560361903   | 0.676716208  | 0.266290396   | 0.125434086 | 0.408784926 | 0.699592352 | 0.306836605 | 0.724961817  |
| 0.249844566                                                            | 0.415767908   | 0.281699479  | 0.564102709   | 0.090173393 | 0.727039546 | 0.121851340 | 0.554859519 | 0.4400460563 |
| 0.534159184                                                            | 0.431163758   | 0.276470304  | 0.223673299   | 0.404467613 | 0.087370709 | 0.381972849 | 0.633314133 | 0.061636101  |
| 0.476248235                                                            | 0.655159593   | 0.421548218  | 0.931232035   | 0.099424899 | 0.712075055 | 0.024476215 | 0.972985506 | 0.399738252  |
| 0.557261050                                                            | 0.633825898   | 0.563590288  | 0.588105917   | 0.420598626 | 0.707536023 | 0.709900677 | 0.017996583 | 0.70557928   |
| 0.392510146                                                            | 0.425383985   | 0.280221760  | 0.678661942   | 0.976908088 | 0.460979134 | 0.366470665 | 0.331641048 | 0.070984602  |
| [Cu(NO <sub>3</sub> )] <sup>+</sup> + ads(NO), Fig. 8, E = -970.402 eV |               |              | 0.357088476   | 0.313024193 | 0.791851103 | 0.011546172 | 0.315391988 | 0.731768012  |
| 1.0                                                                    |               |              | 0.015173377   | 0.633827269 | 0.142477736 | 0.668387413 | 0.638426125 | 0.083369106  |
|                                                                        | 13.6750001907 | 0.0000000000 | 0.0000000000  | 0.041322641 | 0.340614617 | 0.345723212 | 0.987203360 | 0.376939505  |
|                                                                        | -6.8375000954 | 11.842975619 | 0.0000000000  | 0.717773963 | 0.658767462 | 0.783051133 | 0.917372048 | 0.473448277  |
|                                                                        | 0.0000000000  | 0.0000000000 | 14.7670001984 | 0.028174913 | 0.976327419 | 0.123813502 | 0.230899960 | 0.780844212  |
| H                                                                      | Al            | Si           | O             | N           | Cu          |             |             |              |
| 12                                                                     | 4             | 32           | 76            | 5           | 1           |             |             |              |
| Direct                                                                 |               |              |               |             |             |             |             |              |
| 0.286226124                                                            | 0.168725982   | 0.465127051  | 0.90066975    | 0.802748680 | 0.937172055 | 0.922971070 | 0.760355771 | 0.1594       |

|                |               |               |                               |                |               |               |             |             |
|----------------|---------------|---------------|-------------------------------|----------------|---------------|---------------|-------------|-------------|
| -6.8375000954  | 11.8428975619 | 0.0000000000  | 0.704503715                   | 0.653290510    | 0.781183958   | 0.913515925   | 0.117544055 | 0.470600426 |
| 0.0000000000   | 0.0000000000  | 14.7670001984 | 0.024448993                   | 0.973865986    | 0.124178834   | 0.228626549   | 0.780061126 | 0.151121035 |
| H Al Si O N Cu |               |               | 0.683342516                   | 0.325407773    | 0.475690693   | 0.903962135   | 0.422483772 | 0.482656658 |
| 12 4 32 76 5 1 |               |               | 0.390226960                   | 0.997049332    | 0.153495952   | 0.554309249   | 0.731081843 | 0.795441806 |
| Direct         |               |               | 0.794613421                   | 0.474896431    | 0.607787490   | 0.241844758   | 0.065390952 | 0.132067233 |
| 0.281352997    | 0.169259936   | 0.463505447   | 0.480747223                   | 0.797325432    | 0.940024018   | 0.919737160   | 0.758063674 | 0.153869692 |
| 0.717662930    | 0.813167095   | 0.401656300   | 0.878875911                   | 0.746475637    | 0.386351287   | 0.574929833   | 0.436813593 | 0.804131269 |
| 0.166449592    | 0.384526163   | 0.191741705   | 0.132666752                   | 0.614903867    | 0.275301456   | 0.794665873   | 0.888676584 | 0.776915073 |
| 0.043877717    | 0.331716329   | 0.251750261   | 0.592809916                   | 0.784317315    | 0.084808387   | 0.795019269   | 0.524489880 | 0.781263828 |
| 0.145086974    | 0.464264810   | 0.270186216   | 0.532607615                   | 0.940519571    | 0.607421458   | 0.798994899   | 0.545153499 | 0.095627345 |
| 0.158061177    | 0.353810459   | 0.307993293   | 0.139631480                   | 0.130550846    | 0.251664251   | 0.442573220   | 0.847343624 | 0.101920605 |
| 0.811586916    | 0.802436531   | 0.598776162   | 0.856314421                   | 0.586356103    | 0.267835468   | 0.131606713   | 0.217769399 | 0.426528215 |
| 0.842214704    | 0.708067715   | 0.642103314   | 0.074120425                   | 0.230211049    | 0.596742094   | 0.492382884   | 0.885313272 | 0.780029833 |
| 0.811458111    | 0.702528298   | 0.532803535   | 0.716850758                   | 0.552098632    | 0.935741305   | 0.144442752   | 0.182927728 | 0.076884791 |
| 0.432574153    | 0.555125475   | 0.609799325   | 0.392948717                   | 0.856400788    | 0.273737341   | 0.804777209   | 0.542706251 | 0.441453427 |
| 0.446819514    | 0.475142568   | 0.687784970   | 0.531216621                   | 0.212361649    | 0.604399204   | 0.589341462   | 0.103201956 | 0.482551743 |
| 0.478918612    | 0.605670810   | 0.713516712   | 0.230264157                   | 0.306237251    | 0.930596471   | 0.142116174   | 0.230693504 | 0.765693784 |
| 0.239695519    | 0.531727970   | 0.045564227   | 0.879780114                   | 0.888577998    | 0.260802180   | 0.452668577   | 0.885782599 | 0.445084125 |
| 0.691529214    | 0.766319931   | 0.825601459   | 0.065684251                   | 0.467463136    | 0.603383064   | 0.475000054   | 0.217148885 | 0.770764470 |
| 0.123548858    | 0.105097041   | 0.365854293   | 0.704660714                   | 0.770251632    | 0.940477490   | 0.803936362   | 0.881925642 | 0.422831625 |
| 0.798457563    | 0.985085607   | 0.495878547   | 0.393492967                   | 0.154801413    | 0.263970286   | 0.131681561   | 0.534769475 | 0.769166052 |
| 0.246679872    | 0.326889753   | 0.822329879   | 0.803880095                   | 0.937505484    | 0.602998853   | 0.807094395   | 0.860788882 | 0.095364705 |
| 0.692175031    | 0.540842235   | 0.043392450   | 0.200034082                   | 0.524471223    | 0.934136987   | 0.473779887   | 0.202844188 | 0.433314472 |
| 0.358254343    | 0.874102831   | 0.374672979   | 0.458107144                   | 0.284748673    | 0.933165371   | 0.153159067   | 0.557154953 | 0.115278706 |
| 0.373858541    | 0.114430018   | 0.367711365   | 0.517550170                   | 0.674993336    | 0.484493673   | 0.459307641   | 0.203235999 | 0.094176404 |
| 0.890646756    | 0.635610878   | 0.369742453   | 0.610335350                   | 0.716944098    | 0.354838639   | 0.270491183   | 0.453357875 | 0.794346750 |
| 0.467805892    | 0.769882381   | 0.832219064   | 0.428146213                   | 0.593860507    | 0.359225988   | 0.916259468   | 0.439223588 | 0.729744375 |
| 0.471368223    | 0.760605097   | 0.045953896   | 0.535394371                   | 0.539481878    | 0.232325703   | 0.238384619   | 0.769841194 | 0.406295508 |
| 0.575950980    | 0.980851114   | 0.710694075   | 0.129547909                   | 0.383587927    | 0.256191194   | 0.263852298   | 0.125724599 | 0.409143865 |
| 0.238226548    | 0.306105137   | 0.040175252   | 0.792594552                   | 0.718861818    | 0.596004784   | 0.564120114   | 0.091063462 | 0.732464015 |
| 0.566873610    | 0.206359565   | 0.709324777   | 0.481508613                   | 0.555229664    | 0.662230372   | 0.215602994   | 0.399807215 | 0.087066069 |
| 0.902331471    | 0.872873425   | 0.365274101   | 0.520316303                   | 0.663530707    | 0.401390433   | 0.929165363   | 0.095839895 | 0.723950326 |
| 0.031102695    | 0.438113898   | 0.709437490   | 0.446162790                   | 0.524464786    | 0.240211189   | 0.584247530   | 0.418803573 | 0.066310853 |
| 0.692074597    | 0.763539493   | 0.046673715   | 0.638808727                   | 0.629747272    | 0.633782983   | 0.669835329   | 0.965446949 | 0.465909421 |
| 0.806693852    | 0.981415689   | 0.705976069   | TS18, Fig. 8, E = -970.049 eV |                |               |               |             |             |
| 0.036521740    | 0.215161845   | 0.703340650   | 1.0                           |                |               |               |             |             |
| 0.799093544    | 0.435297608   | 0.711861610   |                               | 13.6750001907  | 0.0000000000  | 0.0000000000  |             |             |
| 0.465951294    | 0.314107507   | 0.826512337   |                               | -6.8375000954  | 11.8428975619 | 0.0000000000  |             |             |
| 0.906870782    | 0.868944347   | 0.157060891   |                               | 0.0000000000   | 0.0000000000  | 14.7670001984 |             |             |
| 0.465845227    | 0.309883654   | 0.040720508   |                               | H Al Si O N Cu |               |               |             |             |
| 0.569987774    | 0.209275186   | 0.501229823   |                               | 12 4 32 76 5 1 |               |               |             |             |
| 0.133984804    | 0.647270322   | 0.167161167   | Direct                        | 0.284210503    | 0.171295062   | 0.464288563   |             |             |
| 0.030510798    | 0.443392217   | 0.498464227   |                               | 0.726774037    | 0.827775180   | 0.400095224   |             |             |
| 0.370274305    | 0.103084527   | 0.159811378   |                               | 0.167063162    | 0.384773344   | 0.190215722   |             |             |
| 0.235867426    | 0.546223819   | 0.830567718   |                               | 0.043917596    | 0.331417441   | 0.249970213   |             |             |
| 0.797373772    | 0.440125883   | 0.502918243   |                               | 0.144918472    | 0.463904053   | 0.268807113   |             |             |
| 0.035968632    | 0.220261395   | 0.490306497   |                               | 0.158154353    | 0.353669643   | 0.306418985   |             |             |
| 0.697712958    | 0.543828249   | 0.827312171   |                               | 0.809231937    | 0.801191151   | 0.598360062   |             |             |
| 0.363134325    | 0.868188918   | 0.168301806   |                               | 0.832659602    | 0.702914536   | 0.642942548   |             |             |
| 0.563416958    | 0.974154830   | 0.501753032   |                               | 0.813087046    | 0.703651071   | 0.532012939   |             |             |
| 0.896859944    | 0.630469203   | 0.163755313   |                               | 0.421748012    | 0.547969162   | 0.616743803   |             |             |
| 0.127542943    | 0.652792335   | 0.378381371   |                               | 0.451387018    | 0.476823300   | 0.691682875   |             |             |
| 0.138020664    | 0.089332029   | 0.148953274   |                               | 0.482921392    | 0.607716024   | 0.714816511   |             |             |
| 0.694310129    | 0.308921993   | 0.727848828   |                               | 0.239853173    | 0.532133520   | 0.045536902   |             |             |
| 0.120634504    | 0.553120017   | 0.441525340   |                               | 0.692274392    | 0.766354680   | 0.826333523   |             |             |
| 0.380791873    | 0.630321920   | 0.062588371   |                               | 0.126320183    | 0.107355244   | 0.365732998   |             |             |
| 0.022123409    | 0.970553696   | 0.400528848   |                               | 0.800526798    | 0.989015400   | 0.497817963   |             |             |
| 0.707604766    | 0.015485571   | 0.719823182   |                               | 0.247678101    | 0.328447968   | 0.822143197   |             |             |
| 0.363788784    | 0.330921352   | 0.071586989   |                               | 0.691816330    | 0.541073143   | 0.043774337   |             |             |
| 0.019437272    | 0.669724405   | 0.393735468   |                               | 0.358130544    | 0.874744475   | 0.375001371   |             |             |
| 0.007609888    | 0.312632293   | 0.732260644   |                               | 0.375041217    | 0.114991464   | 0.367639214   |             |             |
| 0.669134617    | 0.638783574   | 0.081759192   |                               | 0.891037166    | 0.635880291   | 0.369832158   |             |             |
| 0.342904896    | 0.985763252   | 0.378308386   |                               | 0.468651414    | 0.770565152   | 0.832640707   |             |             |
| 0.913309038    | 0.114119619   | 0.470228821   |                               | 0.471629292    | 0.761496425   | 0.046119299   |             |             |
| 0.228913337    | 0.780213773   | 0.151513726   |                               | 0.576987565    | 0.981729984   | 0.710873306   |             |             |
| 0.903317451    | 0.421617806   | 0.482142806   |                               | 0.238265216    | 0.306683689   | 0.039735042   |             |             |
| 0.553889930    | 0.730969727   | 0.794984281   |                               | 0.567111790    | 0.206642732   | 0.709107220   |             |             |
| 0.241823956    | 0.064638123   | 0.132411107   |                               | 0.907021761    | 0.874553859   | 0.365012318   |             |             |
| 0.919257104    | 0.757440925   | 0.154325217   |                               | 0.031507313    | 0.438659877   | 0.709713936   |             |             |
| 0.574041545    | 0.436211377   | 0.803559336   |                               | 0.691437960    | 0.763523877   | 0.047656942   |             |             |
| 0.794441521    | 0.887868702   | 0.776179969   |                               | 0.807626009    | 0.982503295   | 0.707092583   |             |             |
| 0.794552803    | 0.524371564   | 0.780759513   |                               | 0.037280239    | 0.216035694   | 0.703678668   |             |             |
| 0.799499333    | 0.545253455   | 0.094990075   |                               | 0.799259484    | 0.458756294   | 0.712058127   |             |             |
| 0.442546099    | 0.846554220   | 0.101675436   |                               | 0.466594398    | 0.314723253   | 0.826467097   |             |             |
| 0.131259635    | 0.216976359   | 0.426303923   |                               | 0.906992793    | 0.869260907   | 0.156911984   |             |             |
| 0.491353601    | 0.884841919   | 0.780286968   |                               | 0.465748072    | 0.310008466   | 0.040136278   |             |             |
| 0.144876242    | 0.182428747   | 0.077297755   |                               | 0.571690798    | 0.209287539   | 0.501082182   |             |             |
| 0.804381669    | 0.542291641   | 0.441487491   |                               | 0.133708179    | 0.647185862   | 0.166829526   |             |             |
| 0.585783541    | 0.102311313   | 0.482942343   |                               | 0.031142540    | 0.444385737   | 0.498897433   |             |             |
| 0.140788466    | 0.229185194   | 0.766208887   |                               | 0.370260984    | 0.103519872   | 0.159213960   |             |             |
| 0.451875716    | 0.885282934   | 0.445345670   |                               | 0.236456454    | 0.547264874   | 0.830783129   |             |             |
| 0.474940628    | 0.216488019   | 0.771705329   |                               | 0.797926545    | 0.440936744   | 0.503336132   |             |             |
| 0.797366202    | 0.875661612   | 0.422155827   |                               | 0.037165828    | 0.222229823   | 0.490642607   |             |             |
| 0.131399736    | 0.534236133   | 0.768855810   |                               | 0.698791623    | 0.545093775   | 0.827994227   |             |             |
| 0.807655096    | 0.860117793   | 0.094194934   |                               | 0.362607062    | 0.868563950   | 0.167940423   |             |             |
| 0.471448392    | 0.203112021   | 0.434071183   |                               | 0.564566493    | 0.974378645   | 0.501536965   |             |             |
| 0.153758928    | 0.557547152   | 0.115352593   |                               | 0.896668732    | 0.630726277   | 0.163548231   |             |             |
| 0.459158957    | 0.202852413   | 0.094039732   |                               | 0.127834707    | 0.653194249   | 0.378302127   |             |             |
| 0.269507796    | 0.451750964   | 0.794740081   |                               | 0.138255700    | 0.090275586   | 0.148595691   |             |             |
| 0.915959120    | 0.438759178   | 0.730367839   |                               | 0.694514513    | 0.309203535   | 0.727407575   |             |             |
| 0.237766087    | 0.769900858   | 0.405550063   |                               | 0.121250905    | 0.553767562   | 0.441587031   |             |             |
| 0.261164814    | 0.122703038   | 0.408887863   |                               | 0.380397350    | 0.631576419   | 0.062250346   |             |             |
| 0.564168334    | 0.099923063   | 0.732428014   |                               | 0.026662054    | 0.971690714   | 0.400182128   |             |             |
| 0.215886548    | 0.399526536   | 0.087415531   |                               | 0.709134519    | 0.017763434   | 0.125917032   |             |             |
| 0.927702725    | 0.095313981   | 0.723293483   |                               | 0.363424122    | 0.330671459   | 0.070417099   |             |             |
| 0.583686411    | 0.419612259   | 0.067977943   |                               | 0.019799892    | 0.670134902   | 0.393882036   |             |             |
| 0.670287907    | 0.969076633   | 0.466361076   |                               | 0.007396071    | 0.312837005   | 0.732290328   |             |             |
| 0.340167403    | 0.671032608   | 0.807772040   |                               | 0.668988883    | 0.639011323   | 0.082563266   |             |             |
| 0.356796920    | 0.319190890   | 0.790044665   |                               | 0.342600167    | 0.985973775   | 0             |             |             |

|              |             |             |                                                                       |               |               |             |             |             |
|--------------|-------------|-------------|-----------------------------------------------------------------------|---------------|---------------|-------------|-------------|-------------|
| 0.890884757  | 0.636971176 | 0.369827837 | 0.526596725                                                           | 0.522546768   | 0.290112555   | 0.808706880 | 0.895575225 | 0.412252009 |
| 0.468033373  | 0.774682760 | 0.833113790 | 0.453816086                                                           | 0.483699113   | 0.481272608   | 0.132282645 | 0.536697924 | 0.771506429 |
| 0.471389264  | 0.762639403 | 0.045871459 | 0.597800434                                                           | 0.654977441   | 0.481104046   | 0.806741416 | 0.859483242 | 0.096444652 |
| 0.576102614  | 0.982769132 | 0.711255312 | 0.125534177                                                           | 0.382164776   | 0.253025681   | 0.481105328 | 0.211422205 | 0.427188575 |
| 0.237249300  | 0.306935608 | 0.038444757 | 0.439980149                                                           | 0.518223524   | 0.263071686   | 0.155105904 | 0.556345165 | 0.117043518 |
| 0.568115711  | 0.209156379 | 0.707931876 | 0.797143638                                                           | 0.724205494   | 0.599299967   | 0.457496434 | 0.200136125 | 0.089485437 |
| 0.905158937  | 0.874031544 | 0.364982694 | 0.486086398                                                           | 0.560496867   | 0.670910656   | 0.274219245 | 0.458293021 | 0.792982817 |
| 0.031868100  | 0.441631466 | 0.709697425 | 0.516830564                                                           | 0.571840286   | 0.443146288   | 0.915947676 | 0.441849768 | 0.732542276 |
| 0.691472590  | 0.764337957 | 0.047679473 | 0.639204502                                                           | 0.636982739   | 0.628489912   | 0.234786689 | 0.779143274 | 0.406578511 |
| 0.808156908  | 0.984085441 | 0.708377481 |                                                                       |               |               | 0.266840100 | 0.132435977 | 0.403383672 |
| 0.036772206  | 0.217975110 | 0.703252852 | [Cu(NO <sub>2</sub> ) <sup>+</sup> ](Nitrite, Fig. 8, E = -994.652 eV |               |               | 0.565331161 | 0.095100239 | 0.719873548 |
| 0.799687266  | 0.439167798 | 0.711577892 | 1.0                                                                   |               |               | 0.216420189 | 0.397628069 | 0.086826622 |
| 0.465615600  | 0.314069927 | 0.825656950 | 13.6750001907                                                         | 0.0000000000  | 0.0000000000  | 0.930100560 | 0.098595992 | 0.716975212 |
| 0.906686425  | 0.869287550 | 0.155951872 | -6.8375000954                                                         | 11.8428975619 | 0.0000000000  | 0.587656021 | 0.417088777 | 0.059324052 |
| 0.465168804  | 0.309893906 | 0.038653798 | 0.0000000000                                                          | 0.0000000000  | 14.7670001984 | 0.668132842 | 0.970101178 | 0.462467879 |
| 0.571991384  | 0.210554540 | 0.499777138 | H Al Si O N Cu                                                        |               |               | 0.341508776 | 0.677579820 | 0.814732312 |
| 0.132913738  | 0.647002518 | 0.166394338 | 18 4 32 74 6 1                                                        |               |               | 0.357991487 | 0.321649581 | 0.785028338 |
| 0.031065164  | 0.445455551 | 0.498683006 | Direct                                                                |               |               | 0.010052480 | 0.623819888 | 0.148598179 |
| 0.370403826  | 0.104178481 | 0.157830387 | 0.164682448                                                           | 0.374404013   | 0.192701265   | 0.045047347 | 0.345087141 | 0.466591448 |
| 0.236502558  | 0.548408091 | 0.830644488 | 0.038686968                                                           | 0.323827565   | 0.245547205   | 0.697341263 | 0.654727221 | 0.779451132 |
| 0.797893107  | 0.442253292 | 0.502560616 | 0.146090925                                                           | 0.445652425   | 0.280308664   | 0.022186752 | 0.980228841 | 0.129676551 |
| 0.035792261  | 0.222147793 | 0.489459664 | 0.141590357                                                           | 0.321294487   | 0.303800792   | 0.692214310 | 0.320675373 | 0.476813793 |
| 0.697055280  | 0.546503127 | 0.827113450 | 0.815513790                                                           | 0.810075402   | 0.606175661   | 0.388734519 | 0.995868325 | 0.149637774 |
| 0.361615509  | 0.868786990 | 0.167848453 | 0.849793494                                                           | 0.715090096   | 0.644150615   | 0.800717652 | 0.479526073 | 0.603374243 |
| 0.563593149  | 0.975130498 | 0.501595736 | 0.817213118                                                           | 0.716468751   | 0.535163224   | 0.487799287 | 0.805592954 | 0.944651961 |
| 0.896079302  | 0.631334007 | 0.162367269 | 0.426854759                                                           | 0.546762824   | 0.630032599   | 0.883720338 | 0.752129316 | 0.405893952 |
| 0.127551422  | 0.653249204 | 0.377818346 | 0.464404434                                                           | 0.490481466   | 0.712495148   | 0.142806605 | 0.619704247 | 0.277929634 |
| 0.138163328  | 0.091464311 | 0.147488251 | 0.489783049                                                           | 0.621992111   | 0.723941743   | 0.592609406 | 0.781503618 | 0.091585472 |
| 0.694946655  | 0.313178450 | 0.727943122 | 0.615816176                                                           | 0.800209701   | 0.241935611   | 0.535158038 | 0.930722058 | 0.609354973 |
| 0.121494189  | 0.554229975 | 0.441255182 | 0.690524578                                                           | 0.839823961   | 0.344216257   | 0.143934667 | 0.145409569 | 0.277462744 |
| 0.379706442  | 0.632664561 | 0.059515715 | 0.562939644                                                           | 0.720587254   | 0.336659163   | 0.856451273 | 0.613192141 | 0.265586913 |
| 0.024055682  | 0.973877847 | 0.398811936 | 0.571345806                                                           | 0.846565425   | 0.330146909   | 0.087694995 | 0.232128382 | 0.594628930 |
| 0.706587493  | 0.014153925 | 0.723268330 | 0.294720948                                                           | 0.205477715   | 0.500244796   | 0.723041415 | 0.559578121 | 0.933491588 |
| 0.362139851  | 0.329498857 | 0.068147637 | 0.232204616                                                           | 0.247213766   | 0.580201805   | 0.392301261 | 0.860300362 | 0.276338766 |
| 0.019216128  | 0.669781268 | 0.393754452 | 0.345488340                                                           | 0.233671874   | 0.609489918   | 0.529598653 | 0.223652989 | 0.600287978 |
| 0.008969092  | 0.316204011 | 0.732203901 | 0.362944037                                                           | 0.339168996   | 0.541016996   | 0.234621748 | 0.311409324 | 0.927959321 |
| 0.670075357  | 0.640629530 | 0.083295271 | 0.239487290                                                           | 0.529588163   | 0.046550393   | 0.874036491 | 0.856055260 | 0.259716543 |
| 0.340568274  | 0.986679912 | 0.380360007 | 0.692600489                                                           | 0.772733927   | 0.826804578   | 0.068430901 | 0.481969297 | 0.605169356 |
| 0.912628829  | 0.172325554 | 0.467701346 | 0.135869280                                                           | 0.110591814   | 0.362152457   | 0.700836360 | 0.770414829 | 0.942042021 |
| 0.227682859  | 0.778855132 | 0.150741756 | 0.798217237                                                           | 0.985198200   | 0.492482692   | 0.402204871 | 0.156753540 | 0.261055265 |
| 0.904409468  | 0.428422330 | 0.482220620 | 0.249719754                                                           | 0.332451820   | 0.820439458   | 0.795853913 | 0.935729742 | 0.602407098 |
| 0.556077659  | 0.738579988 | 0.794798911 | 0.694972157                                                           | 0.541037977   | 0.041604605   | 0.199164808 | 0.521504045 | 0.934918582 |
| 0.242476150  | 0.067877665 | 0.130206183 | 0.357596606                                                           | 0.881189883   | 0.377333492   | 0.453200400 | 0.281316191 | 0.929800868 |
| 0.920038044  | 0.758631885 | 0.149938211 | 0.372755408                                                           | 0.122564703   | 0.366904497   | 0.443445683 | 0.496440887 | 0.482320845 |
| 0.574447751  | 0.436693609 | 0.804118514 | 0.890094578                                                           | 0.642710567   | 0.371498138   | 0.601218462 | 0.655881584 | 0.501772761 |
| 0.797923625  | 0.889357388 | 0.776544213 | 0.469387531                                                           | 0.779175162   | 0.836486459   | 0.124092035 | 0.366489828 | 0.256430835 |
| 0.794814527  | 0.292648677 | 0.779342890 | 0.472213298                                                           | 0.760890722   | 0.049035896   | 0.798934162 | 0.727313459 | 0.600554407 |
| 0.798014939  | 0.544684052 | 0.094813712 | 0.577181578                                                           | 0.983020723   | 0.710661292   | 0.487338632 | 0.563406048 | 0.677536786 |
| 0.442281753  | 0.847451746 | 0.102752492 | 0.241410300                                                           | 0.306962520   | 0.037898954   | 0.515085995 | 0.590696216 | 0.453699321 |
| 0.131037891  | 0.218567058 | 0.426003784 | 0.568103313                                                           | 0.211810261   | 0.703193188   | 0.610126793 | 0.801618516 | 0.311713874 |
| 0.488028586  | 0.888026595 | 0.780166328 | 0.904936969                                                           | 0.875074863   | 0.367367178   | 0.309083283 | 0.256312907 | 0.559017181 |
| 0.142842606  | 0.183387950 | 0.075678751 | 0.032336261                                                           | 0.444043607   | 0.709455132   | 0.641249180 | 0.637607932 | 0.633736193 |
| 0.803602219  | 0.543196082 | 0.440520734 | 0.692161381                                                           | 0.761915803   | 0.048700146   |             |             |             |
| 0.589498341  | 0.104227677 | 0.482427269 | 0.806779623                                                           | 0.984236777   | 0.704599559   |             |             |             |
| 0.142655894  | 0.232220501 | 0.763697863 | 0.039402314                                                           | 0.218816057   | 0.699412644   |             |             |             |
| 0.450727016  | 0.887521148 | 0.446113527 | 0.800962090                                                           | 0.440542489   | 0.708196700   |             |             |             |
| 0.474165976  | 0.217253625 | 0.769056082 | 0.465666741                                                           | 0.314284652   | 0.824532926   |             |             |             |
| 0.801076353  | 0.878596246 | 0.424588650 | 0.909675419                                                           | 0.865170181   | 0.154236034   |             |             |             |
| 0.132735357  | 0.537942946 | 0.768596411 | 0.466474921                                                           | 0.308753371   | 0.037604417   |             |             |             |
| 0.807267487  | 0.862498823 | 0.094451509 | 0.570832729                                                           | 0.211667746   | 0.498611093   |             |             |             |
| 0.7474232107 | 0.204084858 | 0.432047814 | 0.135430291                                                           | 0.645587444   | 0.169938296   |             |             |             |
| 0.151999801  | 0.557044327 | 0.114388488 | 0.037123736                                                           | 0.452939481   | 0.499895543   |             |             |             |
| 0.460393995  | 0.204280391 | 0.093273222 | 0.371021360                                                           | 0.103695214   | 0.159225345   |             |             |             |
| 0.270460755  | 0.454784125 | 0.793049216 | 0.237825960                                                           | 0.550038517   | 0.832496285   |             |             |             |
| 0.916409671  | 0.442124844 | 0.730393291 | 0.801257133                                                           | 0.441663623   | 0.498579443   |             |             |             |
| 0.237504736  | 0.770272732 | 0.405750930 | 0.034681343                                                           | 0.222933054   | 0.490342945   |             |             |             |
| 0.264960855  | 0.130047277 | 0.406420469 | 0.697896898                                                           | 0.547571003   | 0.825784564   |             |             |             |
| 0.567627072  | 0.094842359 | 0.731198251 | 0.361321539                                                           | 0.868569016   | 0.169979304   |             |             |             |
| 0.215708315  | 0.400401682 | 0.086269066 | 0.561863363                                                           | 0.972064078   | 0.504169822   |             |             |             |
| 0.927946866  | 0.099016026 | 0.726131260 | 0.899949491                                                           | 0.636238217   | 0.160425314   |             |             |             |
| 0.583176196  | 0.420311213 | 0.063389547 | 0.130177453                                                           | 0.657687724   | 0.379102856   |             |             |             |
| 0.669026434  | 0.966494143 | 0.466350734 | 0.140035987                                                           | 0.094122738   | 0.149021000   |             |             |             |
| 0.67354346   | 0.673505247 | 0.809420347 | 0.694653392                                                           | 0.314609349   | 0.724154294   |             |             |             |
| 0.357978106  | 0.322297305 | 0.789851487 | 0.129952937                                                           | 0.561878204   | 0.443830907   |             |             |             |
| 0.010630759  | 0.630483925 | 0.140467733 | 0.380771905                                                           | 0.630477548   | 0.059457239   |             |             |             |
| 0.036921650  | 0.338353574 | 0.459465146 | 0.031791802                                                           | 0.972839594   | 0.386696130   |             |             |             |
| 0.699939072  | 0.654015243 | 0.779708564 | 0.708859384                                                           | 0.018973924   | 0.724294424   |             |             |             |
| 0.024484182  | 0.974871218 | 0.124789625 | 0.367352277                                                           | 0.333618164   | 0.069088787   |             |             |             |
| 0.685148299  | 0.326945543 | 0.474996626 | 0.016696658                                                           | 0.665520966   | 0.390425086   |             |             |             |
| 0.387901723  | 0.996757209 | 0.150458604 | 0.009629129                                                           | 0.316856742   | 0.723422647   |             |             |             |
| 0.795294881  | 0.478020787 | 0.607717147 | 0.669216990                                                           | 0.636804938   | 0.081736282   |             |             |             |
| 0.483066708  | 0.803221345 | 0.940527439 | 0.351133645                                                           | 0.995598733   | 0.382046044   |             |             |             |
| 0.880712569  | 0.748551965 | 0.390011132 | 0.906221867                                                           | 0.124866776   | 0.485378861   |             |             |             |
| 0.132539824  | 0.615921140 | 0.274735063 | 0.228159428                                                           | 0.779038668   | 0.150988087   |             |             |             |
| 0.592578351  | 0.785967469 | 0.085203357 | 0.911219299                                                           | 0.430242211   | 0.477842599   |             |             |             |
| 0.534308672  | 0.942017777 | 0.607631385 | 0.556623280                                                           | 0.743445694   | 0.795488477   |             |             |             |
| 0.140290961  | 0.132698134 | 0.250274390 | 0.240747899                                                           | 0.063821167   | 0.135894328   |             |             |             |
| 0.856754839  | 0.591360509 | 0.267341197 | 0.931360245                                                           | 0.761993468   | 0.128624931   |             |             |             |
| 0.071167573  | 0.229723006 | 0.596173286 | 0.574705780                                                           | 0.437145442   | 0.402907711   |             |             |             |
| 0.718566239  | 0.557591617 | 0.935191989 | 0.798205197                                                           | 0.892641425   | 0.776424825   |             |             |             |
| 0.391747981  | 0.859380007 | 0.273808241 | 0.279402579                                                           | 0.531355500   | 0.774206161   |             |             |             |
| 0.532788515  | 0.213318288 | 0.602710009 | 0.800388038                                                           | 0.544151127   | 0.095464744   |             |             |             |
| 0.227962717  | 0.307568818 | 0.928754449 | 0.443992972                                                           | 0.843729436   | 0.109427899   |             |             |             |
| 0.878044009  | 0.88446009  | 0.260892093 | 0.119467124                                                           | 0.213808253   | 0.902857661   |             |             |             |



|                                                                     |               |              |              |              |              |                                                                              |               |               |
|---------------------------------------------------------------------|---------------|--------------|--------------|--------------|--------------|------------------------------------------------------------------------------|---------------|---------------|
| 0.126106009                                                         | 0.562695980   | 0.446559966  | 0.558255792  | 0.762985885  | 0.465933293  | 0.847789466                                                                  | 0.602278113   | 0.272294790   |
| 0.375330180                                                         | 0.632270873   | 0.071456984  | 0.681451321  | 0.761660576  | 0.453107685  | 0.090439335                                                                  | 0.232269973   | 0.593889296   |
| 0.033802021                                                         | 0.973684788   | 0.399930894  | 0.534309328  | 0.459603935  | 0.468630821  | 0.713163793                                                                  | 0.544546306   | 0.939502001   |
| 0.708209097                                                         | 0.022681063   | 0.724569619  | 0.403097570  | 0.519409537  | 0.692137301  | 0.397918522                                                                  | 0.864690661   | 0.276902437   |
| 0.362806529                                                         | 0.331239730   | 0.069059514  | 0.521831214  | 0.519221425  | 0.712631881  | 0.520574570                                                                  | 0.205408916   | 0.601788580   |
| 0.013549145                                                         | 0.662802080   | 0.386772126  | 0.517895639  | 0.638276736  | 0.725918949  | 0.229875326                                                                  | 0.309246838   | 0.928563297   |
| 0.009171591                                                         | 0.313505679   | 0.726435184  | 0.235439256  | 0.527727723  | 0.046495035  | 0.865865827                                                                  | 0.870504141   | 0.268216521   |
| 0.664291978                                                         | 0.635285974   | 0.081049338  | 0.704083562  | 0.775300264  | 0.829780042  | 0.056342527                                                                  | 0.480049372   | 0.606550336   |
| 0.350909770                                                         | 0.995723367   | 0.380301535  | 0.138537869  | 0.115338020  | 0.363526821  | 0.707095325                                                                  | 0.778468728   | 0.946094394   |
| 0.906455874                                                         | 0.125592545   | 0.485900700  | 0.797794461  | 0.984449387  | 0.498637438  | 0.400214463                                                                  | 0.154533029   | 0.261090100   |
| 0.225732774                                                         | 0.773659170   | 0.149956271  | 0.247922629  | 0.326854527  | 0.820876002  | 0.779164135                                                                  | 0.933952928   | 0.607961416   |
| 0.909021914                                                         | 0.429332495   | 0.485685796  | 0.691335618  | 0.537539780  | 0.047512870  | 0.202029258                                                                  | 0.519916832   | 0.933154881   |
| 0.561868429                                                         | 0.737129748   | 0.802758753  | 0.359415740  | 0.881282568  | 0.377885431  | 0.465884566                                                                  | 0.294463962   | 0.932216346   |
| 0.233787179                                                         | 0.062758781   | 0.138123229  | 0.372319579  | 0.121400766  | 0.367518336  | 0.462117583                                                                  | 0.636984169   | 0.350390643   |
| 0.929034293                                                         | 0.761878967   | 0.129243478  | 0.891331971  | 0.641221762  | 0.375601292  | 0.494891018                                                                  | 0.458095908   | 0.524240375   |
| 0.751683943                                                         | 0.442278355   | 0.798304498  | 0.473113984  | 0.774713993  | 0.835120797  | 0.130093828                                                                  | 0.373442948   | 0.261311948   |
| 0.796214402                                                         | 0.892774999   | 0.774004579  | 0.468279511  | 0.759083509  | 0.048530355  | 0.680699527                                                                  | 0.908870339   | 0.252174407   |
| 0.790475786                                                         | 0.518099129   | 0.784212053  | 0.579757392  | 0.985144019  | 0.713748634  | 0.315166801                                                                  | 0.252815008   | 0.566467464   |
| 0.796522856                                                         | 0.543416381   | 0.100440077  | 0.237626195  | 0.305472970  | 0.038377415  | 0.592162371                                                                  | 0.710435569   | 0.459029645   |
| 0.444432557                                                         | 0.849715173   | 0.106064886  | 0.565885544  | 0.207807124  | 0.705246985  | 0.489225239                                                                  | 0.565754175   | 0.684497237   |
| 0.121245220                                                         | 0.215631396   | 0.421979487  | 0.906225443  | 0.877471149  | 0.375503272  | 0.549113989                                                                  | 0.644062281   | 0.375923395   |
| 0.493318170                                                         | 0.886896133   | 0.782821596  | 0.032152899  | 0.442154974  | 0.711864293  | 0.539876759                                                                  | 0.606106043   | 0.563265800   |
| 0.143424734                                                         | 0.182162508   | 0.073674597  | 0.691016495  | 0.761285901  | 0.051115148  | Cu <sup>2+</sup> + NH <sub>4</sub> NO <sub>3</sub> , Fig. 8, E = -992.319 eV |               |               |
| 0.798576057                                                         | 0.535573363   | 0.436240047  | 0.805076122  | 0.985687017  | 0.708981514  | 1.0                                                                          |               |               |
| 0.576851010                                                         | 0.098478302   | 0.494111449  | 0.042198211  | 0.217240468  | 0.698551476  | 13.6750001907                                                                | 0.0000000000  | 0.0000000000  |
| 0.138152793                                                         | 0.226312354   | 0.766891301  | 0.803925216  | 0.436460376  | 0.713979065  | -6.8375000954                                                                | 11.8428975619 | 0.0000000000  |
| 0.448482186                                                         | 0.883205354   | 0.445407689  | 0.470256567  | 0.320204049  | 0.825642586  | 0.0000000000                                                                 | 0.0000000000  | 14.7670001984 |
| 0.476818621                                                         | 0.219631374   | 0.771183729  | 0.905648291  | 0.867728055  | 0.163900673  | H                                                                            | Al            | Si            |
| 0.809041440                                                         | 0.897169411   | 0.412662745  | 0.466054708  | 0.310319275  | 0.041114725  | 18                                                                           | 4             | 32            |
| 0.129754692                                                         | 0.532628059   | 0.775506198  | 0.570981026  | 0.211536556  | 0.500253797  | 6                                                                            | 1             |               |
| 0.796911359                                                         | 0.854387462   | 0.113558501  | 0.133397922  | 0.642318964  | 0.172394842  | Direct                                                                       |               |               |
| 0.481256604                                                         | 0.212050721   | 0.426387966  | 0.031892061  | 0.450510025  | 0.500736773  | 0.156795621                                                                  | 0.372668803   | 0.190034077   |
| 0.142822176                                                         | 0.550450683   | 0.113270678  | 0.366226494  | 0.100913569  | 0.159484088  | 0.030992547                                                                  | 0.321534663   | 0.243919626   |
| 0.448973566                                                         | 0.194043159   | 0.086371861  | 0.239804387  | 0.546559513  | 0.830455065  | 0.138812765                                                                  | 0.444654912   | 0.277453423   |
| 0.269201636                                                         | 0.455031071   | 0.788899839  | 0.803374290  | 0.445386201  | 0.505106628  | 0.135854825                                                                  | 0.320787936   | 0.300563782   |
| 0.914318025                                                         | 0.436649024   | 0.731106281  | 0.035905365  | 0.222801208  | 0.490909487  | 0.821990430                                                                  | 0.823290229   | 0.603348494   |
| 0.232612878                                                         | 0.778401613   | 0.404362857  | 0.701399088  | 0.547445059  | 0.868498743  | 0.868498743                                                                  | 0.737836063   | 0.643085897   |
| 0.267452776                                                         | 0.133614466   | 0.403354943  | 0.361482918  | 0.867964447  | 0.171219870  | 0.826370060                                                                  | 0.727399170   | 0.535583436   |
| 0.554792762                                                         | 0.087372169   | 0.720319510  | 0.567436635  | 0.977837026  | 0.501714230  | 0.452933013                                                                  | 0.570033431   | 0.614922106   |
| 0.214271456                                                         | 0.398240417   | 0.088520601  | 0.896763444  | 0.635187328  | 0.169198766  | 0.467924893                                                                  | 0.496378988   | 0.698857844   |
| 0.927058697                                                         | 0.095401563   | 0.711495399  | 0.131505832  | 0.653957725  | 0.379415542  | 0.496979088                                                                  | 0.627618730   | 0.718077064   |
| 0.582000971                                                         | 0.413926601   | 0.074361399  | 0.137480885  | 0.094904095  | 0.151500046  | 0.535411894                                                                  | 0.455635875   | 0.277998757   |
| 0.667340398                                                         | 0.973297596   | 0.456700832  | 0.694077551  | 0.310438931  | 0.717467070  | 0.644488633                                                                  | 0.586256623   | 0.286441058   |
| 0.345189959                                                         | 0.670414448   | 0.804811895  | 0.129239514  | 0.559486508  | 0.446876794  | 0.422930866                                                                  | 0.684396744   | 0.305913270   |
| 0.354236066                                                         | 0.315744668   | 0.787490845  | 0.375845194  | 0.630066633  | 0.063170768  | 0.544135571                                                                  | 0.557746232   | 0.210925639   |
| 0.005531812                                                         | 0.623694003   | 0.157378823  | 0.031511225  | 0.979771495  | 0.389595717  | 0.288894325                                                                  | 0.198088199   | 0.498240590   |
| 0.043903362                                                         | 0.345474333   | 0.466943592  | 0.710908830  | 0.024873329  | 0.733402610  | 0.223408058                                                                  | 0.235550433   | 0.581204951   |
| 0.713668525                                                         | 0.659562945   | 0.789910972  | 0.363643616  | 0.331885546  | 0.068764344  | 0.337152302                                                                  | 0.220947459   | 0.609471142   |
| 0.015946195                                                         | 0.980201960   | 0.125748515  | 0.017627332  | 0.660951257  | 0.388806105  | 0.354309589                                                                  | 0.328514129   | 0.545465529   |
| 0.690214932                                                         | 0.320782334   | 0.481606692  | 0.018558841  | 0.318593866  | 0.723986626  | 0.237094924                                                                  | 0.530808926   | 0.048847828   |
| 0.379339963                                                         | 0.991985321   | 0.150164872  | 0.667083681  | 0.636280477  | 0.083253630  | 0.693725705                                                                  | 0.775515139   | 0.830350697   |
| 0.759990467                                                         | 0.479868382   | 0.608102262  | 0.349811256  | 0.994054317  | 0.383281201  | 0.135947838                                                                  | 0.111492850   | 0.361221761   |
| 0.476146907                                                         | 0.794385493   | 0.943310559  | 0.908247292  | 0.121460333  | 0.483778149  | 0.796712637                                                                  | 0.984794021   | 0.493767053   |
| 0.881963313                                                         | 0.751292765   | 0.414680809  | 0.229104877  | 0.775050461  | 0.155301705  | 0.248579234                                                                  | 0.333231807   | 0.819745123   |
| 0.143140227                                                         | 0.615425706   | 0.278367728  | 0.906378090  | 0.426077336  | 0.473352104  | 0.694104791                                                                  | 0.540730834   | 0.042212013   |
| 0.589793265                                                         | 0.782519639   | 0.088440798  | 0.565509498  | 0.743148625  | 0.798708498  | 0.355213225                                                                  | 0.880145490   | 0.376385659   |
| 0.537496686                                                         | 0.929886281   | 0.607141495  | 0.235261366  | 0.060537290  | 0.137661323  | 0.372918069                                                                  | 0.123207532   | 0.365754694   |
| 0.132988811                                                         | 0.138487428   | 0.251279742  | 0.928748250  | 0.764252007  | 0.147835568  | 0.889263809                                                                  | 0.641159356   | 0.370694965   |
| 0.849367797                                                         | 0.617463827   | 0.269280612  | 0.574801922  | 0.444111317  | 0.800052404  | 0.465784818                                                                  | 0.775200486   | 0.834690034   |
| 0.088061564                                                         | 0.233273908   | 0.595706105  | 0.804416299  | 0.900653839  | 0.783052444  | 0.466801375                                                                  | 0.759499729   | 0.050746508   |
| 0.709052682                                                         | 0.541699171   | 0.939324439  | 0.793056726  | 0.519949973  | 0.784603775  | 0.574202836                                                                  | 0.983145773   | 0.710659554   |
| 0.390845925                                                         | 0.858704925   | 0.274935186  | 0.801271975  | 0.548133731  | 0.099638127  | 0.241179943                                                                  | 0.309115052   | 0.037893623   |
| 0.523723185                                                         | 0.220103607   | 0.601710975  | 0.444954962  | 0.846029937  | 0.108427696  | 0.565228105                                                                  | 0.211398184   | 0.702795923   |
| 0.229957849                                                         | 0.309105933   | 0.929239333  | 0.122687608  | 0.219858184  | 0.418372989  | 0.908857346                                                                  | 0.875427306   | 0.371691346   |
| 0.889338315                                                         | 0.860855460   | 0.266894490  | 0.491208732  | 0.886592865  | 0.780997276  | 0.031459596                                                                  | 0.444183081   | 0.710590780   |
| 0.072099768                                                         | 0.479658782   | 0.607703865  | 0.145135567  | 0.179003611  | 0.070403852  | 0.690804303                                                                  | 0.762060642   | 0.050512262   |
| 0.716852844                                                         | 0.784936666   | 0.947160304  | 0.802320600  | 0.543102503  | 0.443268687  | 0.803781152                                                                  | 0.986908138   | 0.706752777   |
| 0.400044888                                                         | 0.157052457   | 0.259891957  | 0.592711926  | 0.106614053  | 0.485330135  | 0.038787324                                                                  | 0.218190446   | 0.701297400   |
| 0.783352911                                                         | 0.932984591   | 0.600223780  | 0.143092677  | 0.228032678  | 0.764327288  | 0.799089968                                                                  | 0.438504517   | 0.707973242   |
| 0.211703703                                                         | 0.525111079   | 0.934620678  | 0.451907098  | 0.886385918  | 0.464765553  | 0.464789689                                                                  | 0.317517370   | 0.823584855   |
| 0.463631839                                                         | 0.294097096   | 0.931452334  | 0.478896707  | 0.222553924  | 0.770481765  | 0.907416582                                                                  | 0.866385102   | 0.159211069   |
| 0.408799350                                                         | 0.503134906   | 0.491732389  | 0.807451248  | 0.884072185  | 0.430338234  | 0.464786649                                                                  | 0.309058458   | 0.036995299   |
| 0.534458578                                                         | 0.639845729   | 0.418330550  | 0.137152523  | 0.537903488  | 0.768489659  | 0.570300579                                                                  | 0.211061463   | 0.498262107   |
| 0.127182245                                                         | 0.370992631   | 0.259078503  | 0.801210225  | 0.857531965  | 0.105446778  | 0.132606819                                                                  | 0.642893076   | 0.170170128   |
| 0.713044643                                                         | 0.701945424   | 0.588201225  | 0.482098103  | 0.209870279  | 0.426918030  | 0.038099974                                                                  | 0.453619987   | 0.501972139   |
| 0.491020381                                                         | 0.564236462   | 0.679306626  | 0.146444589  | 0.553304017  | 0.112889901  | 0.366545081                                                                  | 0.102750808   | 0.159216940   |
| 0.435905427                                                         | 0.553389966   | 0.414469093  | 0.450911433  | 0.196478099  | 0.088409908  | 0.238595515                                                                  | 0.550985575   | 0.829794884   |
| 0.629328191                                                         | 0.833371460   | 0.291025639  | 0.271992475  | 0.451959193  | 0.790152788  | 0.801190436                                                                  | 0.440857977   | 0.499019235   |
| 0.304079473                                                         | 0.253344953   | 0.559430242  | 0.914703369  | 0.431745350  | 0.744321704  | 0.033277601                                                                  | 0.221715569   | 0.492675394   |
| 0.553255022                                                         | 0.610280633   | 0.557337761  | 0.237216249  | 0.776025653  | 0.404406697  | 0.699005127                                                                  | 0.547781527   | 0.826860428   |
| [Cu(OH)(NH <sub>2</sub> NO)] <sup>+</sup> , Fig. 8, E = -992.948 eV |               |              |              |              |              |                                                                              |               |               |
| 1.0                                                                 | 13.6750001907 | 0.0000000000 | 0.0000000000 | 0.0000000000 | 0.0000000000 | -6.8375000954                                                                | 11.8428975619 | 0.0000000000  |
|                                                                     |               |              |              |              |              | 0.0000000000                                                                 | 0.0000000000  | 14.7670001984 |
| H                                                                   | Al            | Si           | O            | N            | Cu           |                                                                              |               |               |
| 18                                                                  | 4             | 32           | 74           | 6            | 1            | Direct                                                                       |               |               |
| 0.167755172                                                         | 0.377162695   |              |              |              |              |                                                                              |               |               |
